# Supplementary material for: Reduction in Structural Disorder and Functional Complexity in the Thermal Adaptation of Prokaryotes
Source: PubMed Central journal article supplement (PMC2920320; doi:10.1371/journal.pone.0012069), 2010-08-11
Supplement: pone.0012069.s003.pdf [file pone.0012069.s003.pdf]

| Species                                       | temp range        | Opt temp | Average Genome disorder | on Average, the number of residues with disorder >0.5 in genome | percent of proteins with average disorder >0.5 | Number of proteins with 50% residues having disorder >0.5 | Number of proteins in the genome | number of residues >0.5 in all proteins | total number of residues in the whole proteome of the genome | ratio of 100*column I/column J | FoldIndex |
|-----------------------------------------------|-------------------|----------|-------------------------|-----------------------------------------------------------------|------------------------------------------------|-----------------------------------------------------------|----------------------------------|-----------------------------------------|--------------------------------------------------------------|--------------------------------|-----------|
| Acidiphilium cryptum JF-5                     | Mesophilic        | 35C      | 0,25                    | 9,3                                                             | 3,74                                           | 119                                                       | 3559                             | 90364                                   | 1180790                                                      | 7,65284                        | 0,2058    |
| Acidothermus cellulolyticus 11B               | Thermophilic      | 58C      | 0,27                    | 12,16                                                           | 4,68                                           | 77                                                        | 2157                             | 79479                                   | 729823                                                       | 10,8902                        | 0,2080    |
| Acinetobacter baumannii                       | Mesophilic        | 37C      | 0,2                     | 5,1                                                             | 1,37                                           | 52                                                        | 3712                             | 58270                                   | 1162802                                                      | 5,01117                        | 0,1897    |
| Acinetobacter sp. ADP1                        | Mesophilic        | 37C      | 0,19                    | 4,89                                                            | 1,35                                           | 45                                                        | 3325                             | 48254                                   | 1051233                                                      | 4,59023                        | 0,2027    |
| Actinobacillus succinogenes 130Z              | Mesophilic        | 37C      | 0,2                     | 4,47                                                            | 0,82                                           | 20                                                        | 2079                             | 29032                                   | 677681                                                       | 4,28402                        | 0,1593    |
| Aeromonas hydrophila subsp. hydrophila ATCC 7 | Mesophilic        | 22-28C   | 0,21                    | 5,8                                                             | 1,5                                            | 58                                                        | 4122                             | 75196                                   | 1380361                                                      | 5,44756                        | 0,1280    |
| Aeropyrum pernix K1                           | Hyperthermophilic | 90-95C   | 0,18                    | 3,73                                                            | 0,88                                           | 11                                                        | 1700                             | 15364                                   | 492079                                                       | 3,12226                        | 0,1569    |
| Anaeromyxobacter dehalogenans 2CP-C           | Mesophilic        | 30C      | 0,28                    | 12,73                                                           | 5,04                                           | 194                                                       | 4346                             | 178555                                  | 1516999                                                      | 11,7703                        | 0,1901    |
| Anaplasma phagocytophilum HZ                  | Mesophilic        | 37C      | 0,16                    | 4,59                                                            | 2,29                                           | 27                                                        | 1264                             | 19519                                   | 333499                                                       | 5,85279                        | 0,2024    |
| Aquifex aeolicus VF5                          | Hyperthermophilic | 96C      | 0,15                    | 2,02                                                            | 0,38                                           | 3                                                         | 1560                             | 7686                                    | 490148                                                       | 1,5681                         | 0,1966    |
| Archaeoglobus fulgidus DSM 4304               | Hyperthermophilic | 83C      | 0,15                    | 1,71                                                            | 0,21                                           | 7                                                         | 2420                             | 9514                                    | 669587                                                       | 1,42088                        | 0,1413    |
| Arthrobacter aureus TC1                       | Mesophilic        | 30C      | 0,28                    | 13,03                                                           | 5,25                                           | 198                                                       | 4587                             | 181054                                  | 1520762                                                      | 11,9055                        | 0,1819    |
| Azoarcus sp. EbN1                             | Mesophilic        | 26C      | 0,26                    | 11,71                                                           | 6,54                                           | 273                                                       | 4599                             | 127476                                  | 1428035                                                      | 8,92667                        | 0,1850    |
| Bacillus cereus ATCC 10987                    | Mesophilic        | 25-35C   | 0,18                    | 4,73                                                            | 2,09                                           | 118                                                       | 5844                             | 71583                                   | 1533198                                                      | 4,66887                        | 0,1732    |
| Bacillus subtilis subsp. subtilis str. 168    | Mesophilic        | 25-35C   | 0,21                    | 6,36                                                            | 2,41                                           | 90                                                        | 4105                             | 68388                                   | 1221709                                                      | 5,59773                        | 0,2036    |
| Bacteroides fragilis YCH46                    | Mesophilic        | 37C      | 0,18                    | 3,78                                                            | 0,8                                            | 36                                                        | 4625                             | 52766                                   | 1591158                                                      | 3,3162                         | 0,1998    |
| Bartonella bacilliformis KC583                | Mesophilic        | 28C      | 0,2                     | 6,24                                                            | 2,26                                           | 29                                                        | 1283                             | 20227                                   | 387541                                                       | 5,21932                        | 0,2020    |
| Bartonella henselae str. Houston-1            | Mesophilic        | 37C      | 0,2                     | 6,4                                                             | 2,49                                           | 36                                                        | 1488                             | 29133                                   | 467410                                                       | 6,23286                        | 0,1517    |
| Bartonella quintana str. Toulouse             | Mesophilic        | 37C      | 0,2                     | 5,72                                                            | 1,84                                           | 21                                                        | 1142                             | 19701                                   | 379825                                                       | 5,18686                        | 0,1617    |
| Bdellovibrio bacteriovorus HD100              | Mesophilic        | 28-30C   | 0,23                    | 7,15                                                            | 2,56                                           | 89                                                        | 3587                             | 73045                                   | 1169120                                                      | 6,24786                        | 0,2177    |
| Bifidobacterium adolescentis ATCC 15703       | Mesophilic        | 37C      | 0,28                    | 13,52                                                           | 6,07                                           | 79                                                        | 1631                             | 76563                                   | 601390                                                       | 12,731                         | 0,1745    |
| Bifidobacterium longum NCC2705                | Mesophilic        | 37-41C   | 0,28                    | 13,45                                                           | 5,73                                           | 81                                                        | 1729                             | 85181                                   | 641400                                                       | 13,2805                        | 0,2030    |
| Bordetella bronchiseptica RB50                | Mesophilic        | 35-37C   | 0,24                    | 7,62                                                            | 2,36                                           | 104                                                       | 4994                             | 115545                                  | 1629896                                                      | 7,0891                         | 0,1922    |
| Bordetella parapertussis 12822                | Mesophilic        | 35-37C   | 0,24                    | 7,4                                                             | 2,27                                           | 78                                                        | 4185                             | 94818                                   | 1372931                                                      | 6,90625                        | 0,1868    |
| Bordetella pertussis Tohama I                 | Mesophilic        | 35-37C   | 0,24                    | 7,28                                                            | 2,04                                           | 57                                                        | 3436                             | 76329                                   | 1122089                                                      | 6,8024                         | 0,1959    |
| Bradyrhizobium japonicum USDA 110             | Mesophilic        | 25-30C   | 0,25                    | 10,05                                                           | 4,08                                           | 301                                                       | 8317                             | 231485                                  | 2633756                                                      | 8,78916                        | 0,1723    |
| Brucella abortus biovar 1 str. 9-941          | Mesophilic        | 37C      | 0,24                    | 8,25                                                            | 3,01                                           | 91                                                        | 3085                             | 64620                                   | 888817                                                       | 7,27034                        | 0,1462    |
| Brucella melitensis 16M                       | Mesophilic        | 37C      | 0,24                    | 7,9                                                             | 2,47                                           | 64                                                        | 3198                             | 67212                                   | 949492                                                       | 7,07873                        | 0,1397    |
| Brucella ovis ATCC 25840                      | Mesophilic        | 37C      | 0,24                    | 7,97                                                            | 2,66                                           | 72                                                        | 2890                             | 62810                                   | 861814                                                       | 7,28812                        | 0,1565    |
| Brucella suis 1330                            | Mesophilic        | 37C      | 0,23                    | 8,18                                                            | 2,9                                            | 92                                                        | 3271                             | 66114                                   | 930165                                                       | 7,10777                        | 0,1504    |
| Brucella suis ATCC 23445                      | Mesophilic        | 37C      | 0,23                    | 8,27                                                            | 3,02                                           | 87                                                        | 3241                             | 67429                                   | 923864                                                       | 7,29859                        | 0,1940    |
| Burkholderia multivorans ATCC 17616           | Mesophilic        | 37C      | 0,24                    | 8,97                                                            | 3,32                                           | 194                                                       | 6259                             | 162338                                  | 2025361                                                      | 8,01526                        | 0,1613    |
| Burkholderia thailandensis E264               | Mesophilic        | 25-42C   | 0,25                    | 10,73                                                           | 4,47                                           | 232                                                       | 5634                             | 183171                                  | 1942079                                                      | 9,4317                         | 0,1784    |
| Burkholderia xenovorans LB400                 | Mesophilic        | 30C      | 0,24                    | 9,03                                                            | 3,38                                           | 278                                                       | 8702                             | 218860                                  | 2785166                                                      | 7,85806                        | 0,2049    |
| Caldicellulosiruptor saccharolyticus DSM 8903 | Thermophilic      | ND       | 0,14                    | 1,81                                                            | 0,37                                           | 8                                                         | 2679                             | 13947                                   | 852447                                                       | 1,63611                        | 0,1780    |
| Caldivirga maquilingensis IC-167              | Hyperthermophilic | 85C      | 0,14                    | 1,83                                                            | 0,36                                           | 5                                                         | 1963                             | 8248                                    | 601176                                                       | 1,37198                        | 0,1950    |
| Campylobacter hominis ATCC BAA-381            | Mesophilic        | 37C      | 0,14                    | 2,78                                                            | 0,83                                           | 17                                                        | 1687                             | 12354                                   | 481482                                                       | 2,56583                        | 0,1815    |
| Candidatus Methanoregula boonei 6A8           | Mesophilic        | 37C      | 0,22                    | 6,28                                                            | 2,04                                           | 45                                                        | 2450                             | 39977                                   | 727444                                                       | 5,49554                        | 0,2005    |
| Carboxydotherrnus hydrogenoformans Z-2901     | Hyperthermophilic | 78C      | 0,16                    | 2,75                                                            | 0,95                                           | 25                                                        | 2620                             | 14106                                   | 721616                                                       | 1,95478                        | 0,1861    |
| Caulobacter crescentus CB15                   | Mesophilic        | 35C      | 0,27                    | 11,16                                                           | 5,43                                           | 180                                                       | 3737                             | 112698                                  | 1209209                                                      | 9,31998                        | 0,1742    |
| Chlamydia muridarum Nigg                      | Mesophilic        | 37C      | 0,18                    | 5,37                                                            | 2,2                                            | 18                                                        | 911                              | 14531                                   | 323040                                                       | 4,4982                         | 0,1625    |
| Chlamydia trachomatis D/UW-3/CX               | Mesophilic        | 37C      | 0,18                    | 5,82                                                            | 2,68                                           | 22                                                        | 895                              | 16037                                   | 312363                                                       | 5,13409                        | 0,2030    |
| Chlamydomydia caviae GPIC                     | Mesophilic        | 37C      | 0,19                    | 5,87                                                            | 2,09                                           | 22                                                        | 1005                             | 18694                                   | 350813                                                       | 5,32876                        | 0,1945    |

|                                                                  |               |        |      |       |      |     |      |        |         |         |        |
|------------------------------------------------------------------|---------------|--------|------|-------|------|-----|------|--------|---------|---------|--------|
| <i>Chlamydomphila pneumoniae</i> AR39                            | Mesophilic    | 37C    | 0,18 | 5,83  | 2,34 | 24  | 1112 | 17978  | 364115  | 4,93745 | 0,1775 |
| <i>Chlamydomphila pneumoniae</i> CWL029                          | Mesophilic    | 37C    | 0,18 | 5,81  | 2,38 | 21  | 1052 | 17839  | 362041  | 4,92734 | 0,1777 |
| <i>Chlamydomphila pneumoniae</i> J138                            | Mesophilic    | 37C    | 0,19 | 5,82  | 2,43 | 22  | 1069 | 18008  | 366322  | 4,91589 | 0,1666 |
| <i>Chlorobium tepidum</i> TLS                                    | Thermophilic  | 48C    | 0,22 | 7,37  | 3,24 | 70  | 2252 | 32527  | 630738  | 5,15697 | 0,1569 |
| <i>Chromobacterium violaceum</i> ATCC 12472                      | Mesophilic    | 25C    | 0,23 | 7,79  | 2,88 | 121 | 4407 | 102299 | 1398086 | 7,31707 | 0,1764 |
| <i>Chromohalobacter salexigens</i> DSM 3043                      | Mesophilic    | 37C    | 0,26 | 10,22 | 3,73 | 107 | 3298 | 103630 | 1099708 | 9,42341 | 0,1729 |
| <i>Clavibacter michiganensis</i> subsp. <i>michiganensis</i>     | Mesophilic    | 25-28C | 0,3  | 14,81 | 5,36 | 134 | 3079 | 140121 | 1007926 | 13,9019 | 0,1880 |
| <i>Clostridium acetobutylicum</i> ATCC 824                       | Mesophilic    | 10-65C | 0,17 | 2,83  | 0,75 | 24  | 3848 | 31720  | 1177004 | 2,69498 | 0,1897 |
| <i>Clostridium botulinum</i> A str. ATCC 19397                   | Mesophilic    | 37C    | 0,16 | 3,11  | 1,04 | 34  | 3590 | 26378  | 1052834 | 2,50543 | 0,1798 |
| <i>Clostridium botulinum</i> A str. ATCC 3502                    | Mesophilic    | 37C    | 0,16 | 3,08  | 1    | 35  | 3552 | 26620  | 1042007 | 2,55469 | 0,1915 |
| <i>Clostridium botulinum</i> A str. Hall                         | Mesophilic    | 37C    | 0,16 | 3,03  | 1,03 | 32  | 3404 | 24669  | 1007070 | 2,44958 | 0,1523 |
| <i>Clostridium botulinum</i> A3 str. Loch Maree                  | Mesophilic    | 37C    | 0,16 | 3,04  | 0,9  | 37  | 3984 | 29680  | 1148930 | 2,58327 | 0,1534 |
| <i>Clostridium botulinum</i> B1 str. Okra                        | Mesophilic    | 37C    | 0,16 | 3,1   | 1,01 | 36  | 3852 | 28245  | 1105625 | 2,55466 | 0,1618 |
| <i>Clostridium botulinum</i> F str. Langeland                    | Mesophilic    | 37C    | 0,17 | 3,13  | 0,98 | 33  | 3659 | 27923  | 1075716 | 2,59576 | 0,2119 |
| <i>Clostridium difficile</i> 630                                 | Mesophilic    | 37C    | 0,17 | 2,82  | 0,8  | 25  | 3753 | 32879  | 1173228 | 2,80244 | 0,1098 |
| <i>Clostridium perfringens</i> ATCC 13124                        | Mesophilic    | 37C    | 0,17 | 3,39  | 1,15 | 25  | 2723 | 25997  | 856066  | 3,0368  | 0,1465 |
| <i>Clostridium perfringens</i> SM101                             | Mesophilic    | 37C    | 0,17 | 3,2   | 1,06 | 31  | 2876 | 28989  | 899399  | 3,22315 | 0,1609 |
| <i>Clostridium perfringens</i> str. 13                           | Mesophilic    | 37C    | 0,17 | 3,21  | 1,03 | 27  | 2631 | 22509  | 797744  | 2,82158 | 0,1705 |
| <i>Clostridium phytofermentans</i> ISDg                          | Mesophilic    | 37C    | 0,17 | 3,4   | 1    | 35  | 3902 | 44021  | 1318750 | 3,33809 | 0,1950 |
| <i>Clostridium tetani</i> E88                                    | Mesophilic    | 37C    | 0,16 | 2,29  | 0,29 | 5   | 2432 | 17845  | 814431  | 2,1911  | 0,1851 |
| <i>Clostridium thermocellum</i> ATCC 27405                       | Thermophilic  | 60C    | 0,18 | 3,4   | 0,75 | 16  | 3189 | 37328  | 1068839 | 3,49239 | 0,1920 |
| <i>Colwellia psychrerythraea</i> 34H                             | Psychrophilic | 8C     | 0,19 | 4,43  | 1,08 | 53  | 4910 | 65172  | 1512173 | 4,30982 | 0,1841 |
| <i>Corynebacterium diphtheriae</i> NCTC 13129                    | Mesophilic    | 37C    | 0,27 | 11,1  | 4,05 | 85  | 2272 | 75389  | 727426  | 10,3638 | 0,1801 |
| <i>Corynebacterium efficiens</i> YS-314                          | Mesophilic    | 30-45C | 0,3  | 14,97 | 6,2  | 156 | 2950 | 131263 | 958318  | 13,6972 | 0,1503 |
| <i>Corynebacterium glutamicum</i> R                              | Mesophilic    | 30-40C | 0,27 | 10,96 | 3,96 | 97  | 3080 | 98542  | 962200  | 10,2413 | 0,1839 |
| <i>Coxiella burnetii</i> RSA 493                                 | Mesophilic    | 37C    | 0,2  | 6,92  | 3,65 | 70  | 2052 | 26827  | 570164  | 4,70514 | 0,1491 |
| <i>Cytophaga hutchinsonii</i> ATCC 33406                         | Mesophilic    | 30C    | 0,16 | 3,13  | 0,98 | 37  | 3785 | 36596  | 1327846 | 2,75604 | 0,1925 |
| <i>Dehalococcoides ethenogenes</i> 195                           | Mesophilic    | 35C    | 0,19 | 4,81  | 1,46 | 20  | 1580 | 18292  | 438843  | 4,16823 | 0,1959 |
| <i>Deinococcus geothermalis</i> DSM 11300                        | Mesophilic    | 47C    | 0,28 | 12,11 | 4,74 | 120 | 3062 | 107725 | 970757  | 11,097  | 0,1771 |
| <i>Deinococcus radiodurans</i> R1                                | Mesophilic    | 30-37C | 0,3  | 13,86 | 6,13 | 160 | 3181 | 130115 | 985225  | 13,2066 | 0,2109 |
| <i>Delftia acidovorans</i> SPH-1                                 | Mesophilic    | 30C    | 0,26 | 10,22 | 3,08 | 154 | 6040 | 194023 | 2020772 | 9,60143 | 0,1569 |
| <i>Desulfotalea psychrophila</i> L5v54                           | Psychrophilic | 7C     | 0,19 | 4,25  | 0,93 | 33  | 3234 | 41934  | 1036990 | 4,04382 | 0,1760 |
| <i>Desulfotomaculum reducens</i> MI-1                            | Mesophilic    | 37C    | 0,2  | 4,5   | 1,19 | 33  | 3276 | 40190  | 999111  | 4,02258 | 0,2097 |
| <i>Desulfovibrio desulfuricans</i> G20                           | Mesophilic    | 25-40C | 0,24 | 8,99  | 3,84 | 138 | 3775 | 82351  | 1121515 | 7,34284 | 0,1943 |
| <i>Desulfovibrio vulgaris</i> subsp. <i>vulgaris</i> str. Hilden | Mesophilic    | 25-40C | 0,25 | 10,43 | 4,39 | 144 | 3531 | 99335  | 1078093 | 9,21395 | 0,2034 |
| <i>Dichelobacter nodosus</i> VCS1703A                            | Mesophilic    | 37C    | 0,19 | 5     | 1,48 | 16  | 1280 | 21856  | 417601  | 5,2337  | 0,2156 |
| <i>Dinoroseobacter shibae</i> DFL 12                             | Mesophilic    | 33C    | 0,25 | 8,8   | 2,87 | 95  | 4187 | 110459 | 1317230 | 8,3857  | 0,1165 |
| <i>Enterobacter sakazakii</i> ATCC BAA-894                       | Mesophilic    | 37C    | 0,22 | 6,77  | 2,35 | 104 | 4434 | 82035  | 1342332 | 6,11138 | 0,1638 |
| <i>Enterococcus faecalis</i> V583                                | Mesophilic    | 37C    | 0,21 | 6,33  | 2,85 | 74  | 3265 | 62870  | 960383  | 6,54635 | 0,1929 |
| <i>Escherichia coli</i> CFT073                                   | Mesophilic    | 37C    | 0,21 | 6,1   | 2,06 | 105 | 5379 | 84947  | 1569865 | 5,4111  | 0,2019 |
| <i>Escherichia coli</i> DH10B                                    | Mesophilic    | 37C    | 0,21 | 5,68  | 1,62 | 64  | 4126 | 65495  | 1297117 | 5,04927 | 0,1903 |
| <i>Escherichia coli</i> E24377A                                  | Mesophilic    | 37C    | 0,21 | 6,25  | 2,04 | 95  | 4997 | 82398  | 1487042 | 5,54107 | 0,1783 |
| <i>Escherichia coli</i> HS                                       | Mesophilic    | 37C    | 0,21 | 5,79  | 1,76 | 72  | 4384 | 69230  | 1335595 | 5,18346 | 0,1855 |
| <i>Escherichia coli</i> W3110                                    | Mesophilic    | 37C    | 0,21 | 5,6   | 1,51 | 61  | 4226 | 68095  | 1339321 | 5,08429 | 0,1604 |
| <i>Fervidobacterium nodosum</i> Rt17-B1                          | Thermophilic  | 70C    | 0,14 | 1,9   | 0,29 | 5   | 1750 | 8926   | 585328  | 1,52496 | 0,1720 |
| <i>Flavobacterium johnsoniae</i> UW101                           | Mesophilic    | 20-30C | 0,18 | 3,36  | 1,08 | 47  | 5017 | 54723  | 1769529 | 3,09252 | 0,1548 |
| <i>Fusobacterium nucleatum</i> subsp. <i>nucleatum</i> ATCC      | Mesophilic    | 37C    | 0,15 | 2,61  | 1,02 | 22  | 2067 | 15617  | 643488  | 2,42693 | 0,1090 |
| <i>Geobacillus kaustophilus</i> HTA426                           | Thermophilic  | ND     | 0,21 | 6,49  | 2,77 | 95  | 3540 | 48731  | 1014285 | 4,80447 | 0,2025 |

|                                                  |                   |         |      |       |       |     |      |        |         |         |        |
|--------------------------------------------------|-------------------|---------|------|-------|-------|-----|------|--------|---------|---------|--------|
| Geobacillus thermodenitrificans NG80-2           | Thermophilic      | 65C     | 0,2  | 5,43  | 2,15  | 67  | 3445 | 44507  | 1003478 | 4,43527 | 0,2220 |
| Geobacter metallireducens GS-15                  | Mesophilic        | 30C     | 0,22 | 6,06  | 1,81  | 54  | 3532 | 66541  | 1211145 | 5,49406 | 0,1559 |
| Geobacter sulfurreducens PCA                     | Mesophilic        | 30C     | 0,22 | 6,87  | 2,41  | 76  | 3446 | 66680  | 1137980 | 5,85951 | 0,1807 |
| Gluconacetobacter diazotrophicus PAI 5           | Mesophilic        | 30C     | 0,27 | 12,92 | 6,28  | 225 | 3852 | 126157 | 1197244 | 10,5373 | 0,2011 |
| Gluconobacter oxydans 621H                       | Mesophilic        | 25-30C  | 0,28 | 12,25 | 4,58  | 100 | 2664 | 94256  | 870283  | 10,8305 | 0,1592 |
| Haemophilus ducreyi 35000HP                      | Mesophilic        | 35-37C  | 0,18 | 4,49  | 1,16  | 23  | 1717 | 22042  | 480322  | 4,589   | 0,1550 |
| Haemophilus influenzae Rd KW20                   | Mesophilic        | 35-37C  | 0,19 | 4,32  | 1,09  | 14  | 1657 | 21013  | 516236  | 4,07043 | 0,1577 |
| Haemophilus somnus 129PT                         | Mesophilic        | 35-37C  | 0,18 | 4,07  | 1,17  | 20  | 1798 | 33455  | 589704  | 5,67319 | 0,1556 |
| Haemophilus somnus 2336                          | Mesophilic        | 35-37C  | 0,19 | 4,46  | 1,16  | 24  | 1980 | 38208  | 657271  | 5,81313 | 0,1427 |
| Haloarcula marismortui ATCC 43049                | Mesophilic        | 40-50C  | 0,35 | 24,04 | 14,25 | 545 | 4240 | 284145 | 1203534 | 23,6092 | 0,2264 |
| Halobacterium salinarum R1                       | Thermophilic      | 50C     | 0,34 | 21,88 | 11,86 | 305 | 2749 | 160850 | 774914  | 20,7571 | 0,1740 |
| Halobacterium sp. NRC-1                          | Mesophilic        | 42C     | 0,35 | 22,15 | 12,2  | 291 | 2622 | 156490 | 737458  | 21,2202 | 0,1923 |
| Helicobacter acinonychis str. Sheeba             | Mesophilic        | 37C     | 0,17 | 4,72  | 1,73  | 29  | 1618 | 18086  | 464163  | 3,89648 | 0,1526 |
| Helicobacter hepaticus ATCC 51449                | Mesophilic        | 37C     | 0,16 | 3,51  | 1,12  | 18  | 1875 | 17008  | 558337  | 3,04619 | 0,1832 |
| Helicobacter pylori 26695                        | Mesophilic        | 37C     | 0,17 | 5,42  | 2,41  | 36  | 1576 | 22855  | 501419  | 4,55806 | 0,1340 |
| Helicobacter pylori HPAG1                        | Mesophilic        | 37C     | 0,17 | 5,13  | 2,4   | 38  | 1544 | 22042  | 489511  | 4,50286 | 0,1574 |
| Helicobacter pylori J99                          | Mesophilic        | 37C     | 0,18 | 5,32  | 2,42  | 37  | 1489 | 23208  | 494009  | 4,69789 | 0,1593 |
| Helibacterium modesticaldum Ice1                 | Thermophilic      | 50-52C  | 0,23 | 8,64  | 4     | 113 | 3000 | 59486  | 880842  | 6,75331 | 0,1553 |
| Hyperthermus butylicus DSM 5456                  | Hyperthermophilic | 95-106C | 0,16 | 3,02  | 0,5   | 7   | 1602 | 10299  | 449798  | 2,28969 | 0,1465 |
| Hyphomonas neptunium ATCC 15444                  | Mesophilic        | 37C     | 0,26 | 9,85  | 3,57  | 99  | 3505 | 95495  | 1114601 | 8,56764 | 0,1711 |
| Idiomarina loihiensis L2TR                       | Mesophilic        | 4-46C   | 0,24 | 8,02  | 2,51  | 62  | 2628 | 64357  | 869940  | 7,39787 | 0,2011 |
| Jannaschia sp. CCS1                              | Mesophilic        | 30C     | 0,25 | 8,6   | 2,64  | 100 | 4283 | 111167 | 1327554 | 8,37382 | 0,1694 |
| Kineococcus radiotolerans SRS30216               | Mesophilic        | 32C     | 0,33 | 18,51 | 9,74  | 377 | 4681 | 242584 | 1489738 | 16,2837 | 0,1802 |
| Klebsiella pneumoniae subsp. pneumoniae MGH      | Mesophilic        | 37C     | 0,21 | 5,71  | 1,7   | 83  | 5187 | 85047  | 1619320 | 5,25202 | 0,1892 |
| Lactobacillus acidophilus NCFM                   | Mesophilic        | 25-35C  | 0,22 | 6,53  | 2,69  | 39  | 1862 | 43542  | 584499  | 7,44946 | 0,1914 |
| Lactobacillus brevis ATCC 367                    | Mesophilic        | 25-35C  | 0,22 | 7,21  | 2,57  | 47  | 2218 | 45008  | 650815  | 6,91564 | 0,1882 |
| Lactobacillus casei ATCC 334                     | Mesophilic        | 30-40C  | 0,22 | 7,12  | 2,35  | 60  | 2771 | 54370  | 798238  | 6,81125 | 0,1778 |
| Lactobacillus delbrueckii subsp. bulgaricus ATCC | Mesophilic        | 42C     | 0,21 | 6,03  | 2,32  | 39  | 1721 | 24079  | 475905  | 5,05962 | 0,1889 |
| Lactobacillus gasserii ATCC 33323                | Mesophilic        | 25-35C  | 0,22 | 6,37  | 2,22  | 33  | 1755 | 39654  | 556923  | 7,12019 | 0,1542 |
| Lactobacillus johnsonii NCC 533                  | Mesophilic        | 25-35C  | 0,21 | 6,24  | 2,58  | 42  | 1821 | 47289  | 591376  | 7,99644 | 0,2029 |
| Lactobacillus plantarum WCFS1                    | Mesophilic        | 25-35C  | 0,21 | 6,01  | 2,19  | 54  | 3057 | 60315  | 931444  | 6,47543 | 0,2095 |
| Lactococcus lactis subsp. cremoris MG1363        | Mesophilic        | 40C     | 0,2  | 4,92  | 1,68  | 36  | 2434 | 33616  | 692229  | 4,8562  | 0,1885 |
| Lactococcus lactis subsp. cremoris SK11          | Mesophilic        | 40C     | 0,19 | 4,87  | 1,68  | 40  | 2504 | 32025  | 693740  | 4,61628 | 0,1499 |
| Leifsonia xyli subsp. xyli str. CTCB07           | Mesophilic        | 20-25C  | 0,28 | 12,53 | 5,07  | 79  | 2030 | 67340  | 602316  | 11,1802 | 0,1508 |
| Leptospira interrogans serovar Copenhageni str.  | Mesophilic        | 28-30C  | 0,17 | 3,73  | 0,93  | 30  | 3658 | 42528  | 1151209 | 3,6942  | 0,1805 |
| Leptospira interrogans serovar Lai str. 56601    | Mesophilic        | 28-30C  | 0,16 | 3,59  | 1,04  | 46  | 4727 | 44878  | 1221026 | 3,67543 | 0,1647 |
| Leuconostoc mesenteroides subsp. mesenteroid     | Mesophilic        | 20-30C  | 0,21 | 5,95  | 1,95  | 36  | 2005 | 34268  | 606767  | 5,64764 | 0,2003 |
| Listeria innocua Clip11262                       | Mesophilic        | 30-37C  | 0,21 | 5,24  | 1,61  | 45  | 3043 | 46562  | 911734  | 5,10697 | 0,1926 |
| Listeria monocytogenes EGD-e                     | Mesophilic        | 30-37C  | 0,2  | 4,89  | 1,51  | 41  | 2846 | 42743  | 870846  | 4,90822 | 0,1795 |
| Listeria monocytogenes str. 4b F2365             | Mesophilic        | 30-37C  | 0,2  | 4,81  | 1,45  | 35  | 2821 | 41317  | 853671  | 4,83992 | 0,1764 |
| Mannheimia succiniciproducens MBEL55E            | Mesophilic        | 37C     | 0,18 | 4,32  | 1,22  | 33  | 2380 | 27721  | 689990  | 4,01759 | 0,1717 |
| Maricaulis maris MCS10                           | Mesophilic        | 20-25C  | 0,26 | 9,82  | 3,04  | 78  | 3063 | 93313  | 1006730 | 9,26892 | 0,1702 |
| Marinobacter aquaeolei VT8                       | Mesophilic        | 30C     | 0,26 | 9,8   | 3,18  | 116 | 4272 | 130268 | 1423715 | 9,14986 | 0,1543 |
| Mesoplasma florum L1                             | Mesophilic        | 20-40C  | 0,17 | 3,28  | 0,88  | 6   | 682  | 7051   | 244942  | 2,87864 | 0,1673 |
| Metallospira sedula DSM 5348                     | Thermophilic      | 70C     | 0,17 | 2,58  | 0,4   | 11  | 2256 | 13535  | 640287  | 2,1139  | 0,2172 |
| Methanobrevibacter smithii ATCC 35061            | Mesophilic        | 37-40C  | 0,19 | 4,01  | 1,06  | 20  | 1793 | 19020  | 555768  | 3,42229 | 0,1753 |
| Methanococcoides burtonii DSM 6242               | Mesophilic        | 23.4C   | 0,2  | 4,21  | 0,88  | 16  | 2273 | 27034  | 687337  | 3,93315 | 0,1944 |
| Methanococcus aeolicus Nankai-3                  | Mesophilic        | 42C     | 0,18 | 2,88  | 0,47  | 6   | 1490 | 10911  | 439206  | 2,48426 | 0,1712 |

|                                               |                   |        |      |       |      |     |      |        |         |         |        |
|-----------------------------------------------|-------------------|--------|------|-------|------|-----|------|--------|---------|---------|--------|
| Methanococcus maripaludis S2                  | Mesophilic        | 35-40C | 0,17 | 2,5   | 0,41 | 6   | 1722 | 10639  | 490051  | 2,171   | 0,1844 |
| Methanococcus vannielii SB                    | Mesophilic        | 30C    | 0,16 | 1,88  | 0,12 | 2   | 1678 | 8033   | 489682  | 1,64045 | 0,1484 |
| Methanocorpusculum labreanum Z                | Mesophilic        | 37C    | 0,19 | 3,57  | 0,75 | 10  | 1739 | 17193  | 522502  | 3,29051 | 0,1587 |
| Methanoculleus marisnigri JR1                 | Mesophilic        | 21-25C | 0,23 | 7,06  | 2,73 | 59  | 2489 | 42941  | 719678  | 5,9667  | 0,1421 |
| Methanopyrus kandleri AV19                    | Hyperthermophilic | 98C    | 0,25 | 7,51  | 1,9  | 24  | 1687 | 35652  | 501100  | 7,11475 | 0,2406 |
| Methanosphaera thermophila PT                 | Thermophilic      | ND     | 0,2  | 3,72  | 0,47 | 7   | 1696 | 18837  | 513525  | 3,66818 | 0,1950 |
| Methanosarcina acetivorans C2A                | Mesophilic        | 35-40C | 0,2  | 5,27  | 1,43 | 58  | 4540 | 76140  | 1415838 | 5,37773 | 0,2115 |
| Methanosarcina mazei Go1                      | Mesophilic        | 30-40C | 0,2  | 5,39  | 1,81 | 52  | 3370 | 53447  | 1021269 | 5,23339 | 0,1390 |
| Methanosphaera stadtmanae DSM 3091            | Mesophilic        | 36-40C | 0,21 | 5,21  | 2,15 | 30  | 1534 | 23510  | 493971  | 4,75939 | 0,2109 |
| Methanospirillum hungatei JF-1                | Mesophilic        | 37C    | 0,2  | 4,69  | 1,02 | 29  | 3139 | 48720  | 1014087 | 4,80432 | 0,1570 |
| Methylobium petroleiphilum PM1                | Mesophilic        | 30C    | 0,26 | 9,81  | 3,33 | 131 | 4449 | 119374 | 1412766 | 8,44967 | 0,2018 |
| Methylobacillus flagellatus KT                | Mesophilic        | 30-42C | 0,22 | 6,63  | 2,07 | 53  | 2753 | 53764  | 890782  | 6,0356  | 0,1983 |
| Methylobacterium extorquens PA1               | Mesophilic        | 25-30C | 0,28 | 13,49 | 7,04 | 297 | 4829 | 170083 | 1527522 | 11,1346 | 0,1565 |
| Methylococcus capsulatus str. Bath            | Thermophilic      | 45C    | 0,25 | 9,51  | 4,47 | 116 | 2956 | 74550  | 982447  | 7,5882  | 0,1912 |
| Moorella thermoacetica ATCC 39073             | Thermophilic      | 58C    | 0,2  | 4,84  | 1,38 | 22  | 2465 | 33641  | 755527  | 4,45265 | 0,1847 |
| Mycobacterium avium 104                       | Mesophilic        | 37C    | 0,29 | 13,27 | 6,33 | 260 | 5120 | 180531 | 1612773 | 11,1938 | 0,1968 |
| Mycobacterium avium subsp. paratuberculosis K | Mesophilic        | 37C    | 0,29 | 13,12 | 5,47 | 198 | 4350 | 178532 | 1469173 | 12,1519 | 0,1949 |
| Mycobacterium bovis AF2122/97                 | Mesophilic        | 37C    | 0,28 | 12,37 | 5,46 | 189 | 3920 | 151453 | 1307802 | 11,5807 | 0,2140 |
| Mycobacterium leprae TN                       | Mesophilic        | 37C    | 0,26 | 9,92  | 3,36 | 45  | 1605 | 46953  | 538437  | 8,72024 | 0,1592 |
| Mycobacterium smegmatis str. MC2 155          | Mesophilic        | 37C    | 0,29 | 12,95 | 6,03 | 351 | 6716 | 232966 | 2118292 | 10,9978 | 0,1670 |
| Mycobacterium tuberculosis CDC1551            | Mesophilic        | 37C    | 0,29 | 14,04 | 7,28 | 289 | 4189 | 160925 | 1326524 | 12,1313 | 0,2006 |
| Mycobacterium tuberculosis F11                | Mesophilic        | 37C    | 0,28 | 12,38 | 5,33 | 189 | 3941 | 156931 | 1339537 | 11,7153 | 0,1940 |
| Mycobacterium tuberculosis H37Rv              | Mesophilic        | 37C    | 0,28 | 12,4  | 5,39 | 194 | 3989 | 155377 | 1336162 | 11,6286 | 0,1784 |
| Mycobacterium ulcerans Agy99                  | Mesophilic        | 32C    | 0,28 | 11,88 | 4,64 | 168 | 4160 | 149512 | 1353971 | 11,0425 | 0,1785 |
| Mycobacterium vanbaalenii PYR-1               | Mesophilic        | 24-37C | 0,28 | 12,19 | 4,83 | 231 | 5979 | 227615 | 1974441 | 11,5281 | 0,1498 |
| Mycoplasma agalactiae PG2                     | Psychrophilic     | ND     | 0,18 | 4,95  | 2,56 | 17  | 742  | 10880  | 255606  | 4,25655 | 0,1706 |
| Mycoplasma capricolum subsp. capricolum ATCC  | Mesophilic        | 37C    | 0,17 | 4,84  | 1,72 | 12  | 812  | 12619  | 296533  | 4,25551 | 0,1601 |
| Mycoplasma gallisepticum R                    | Mesophilic        | 37C    | 0,19 | 6,92  | 2,48 | 12  | 726  | 24048  | 291039  | 8,26281 | 0,1671 |
| Mycoplasma genitalium G37                     | Mesophilic        | 37C    | 0,16 | 4,86  | 2,1  | 11  | 477  | 8436   | 175727  | 4,80063 | 0,1571 |
| Mycoplasma hyopneumoniae 232                  | Mesophilic        | 37C    | 0,14 | 4     | 1,16 | 7   | 691  | 12153  | 268125  | 4,53259 | 0,1621 |
| Mycoplasma hyopneumoniae 7448                 | Mesophilic        | 37C    | 0,15 | 4,05  | 1,06 | 7   | 663  | 11637  | 263225  | 4,42093 | 0,1607 |
| Mycoplasma hyopneumoniae J                    | Mesophilic        | 37C    | 0,15 | 4,39  | 1,5  | 10  | 665  | 11768  | 261815  | 4,49478 | 0,1573 |
| Mycoplasma mobile 163K                        | Mesophilic        | 20C    | 0,16 | 3,51  | 1,58 | 5   | 633  | 5574   | 234509  | 2,37688 | 0,2101 |
| Mycoplasma mycoides subsp. mycoides SC str. P | Mesophilic        | 37C    | 0,16 | 4,37  | 1,87 | 12  | 1016 | 11621  | 329458  | 3,52731 | 0,2017 |
| Mycoplasma penetrans HF-2                     | Mesophilic        | 37C    | 0,18 | 5,76  | 1,35 | 15  | 1037 | 21341  | 400551  | 5,32791 | 0,1235 |
| Mycoplasma pneumoniae M129                    | Mesophilic        | 37C    | 0,21 | 8,58  | 3,63 | 29  | 689  | 21393  | 239716  | 8,92431 | 0,2038 |
| Mycoplasma pulmonis UAB CTIP                  | Mesophilic        | 37C    | 0,17 | 5,38  | 2,69 | 19  | 782  | 15924  | 290153  | 5,48814 | 0,1908 |
| Mycoplasma synoviae 53                        | Mesophilic        | 37C    | 0,18 | 5,36  | 1,04 | 6   | 672  | 11215  | 237323  | 4,72563 | 0,1685 |
| Myxococcus xanthus DK 1622                    | Mesophilic        | 20-30C | 0,3  | 15,53 | 7,97 | 498 | 7331 | 393687 | 2780010 | 14,1614 | 0,1635 |
| Nanoarchaeum equitans Kin4-M                  | Hyperthermophilic | 90C    | 0,12 | 1,75  | 0,19 | 1   | 536  | 1820   | 151570  | 1,20077 | 0,1921 |
| Neisseria gonorrhoeae FA 1090                 | Mesophilic        | 35-37C | 0,24 | 8,51  | 3,65 | 63  | 2002 | 42997  | 562017  | 7,65048 | 0,1470 |
| Neisseria meningitidis FAM18                  | Mesophilic        | 35-37C | 0,22 | 6,91  | 2,03 | 34  | 1917 | 41384  | 585009  | 7,07408 | 0,1354 |
| Neisseria meningitidis MC58                   | Mesophilic        | 35-37C | 0,23 | 7,79  | 3,3  | 60  | 2063 | 45894  | 597438  | 7,6818  | 0,2086 |
| Neisseria meningitidis Z2491                  | Mesophilic        | 35-37C | 0,23 | 7,29  | 2,54 | 44  | 2049 | 40370  | 583381  | 6,92001 | 0,1819 |
| Nitratiruptor sp. SB155-2                     | Thermophilic      | ND     | 0,16 | 2,48  | 0,54 | 8   | 1843 | 12403  | 587077  | 2,11267 | 0,1868 |
| Nocardioides sp. JS614                        | Mesophilic        | 30C    | 0,29 | 13,07 | 4,28 | 176 | 4909 | 195585 | 1599588 | 12,2272 | 0,1895 |
| Oceanobacillus iheyensis HTE831               | Mesophilic        | 30C    | 0,21 | 6,91  | 2,77 | 88  | 3500 | 62369  | 1018006 | 6,12658 | 0,2099 |
| Oenococcus oeni PSU-1                         | Mesophilic        | 17-25C | 0,19 | 5,37  | 2,66 | 39  | 1691 | 22497  | 487917  | 4,61083 | 0,1915 |

|                                                 |                   |             |      |       |      |     |      |        |         |         |        |
|-------------------------------------------------|-------------------|-------------|------|-------|------|-----|------|--------|---------|---------|--------|
| Paracoccus denitrificans PD1222                 | Mesophilic        | 25-30C      | 0,26 | 9,86  | 3,47 | 164 | 5077 | 139079 | 1579571 | 8,80486 | 0,1197 |
| Pasteurella multocida subsp. multocida str. Pm7 | Mesophilic        | 37C         | 0,18 | 3,78  | 0,74 | 16  | 2015 | 26681  | 668007  | 3,99412 | 0,1381 |
| Pediococcus pentosaceus ATCC 25745              | Mesophilic        | 30C         | 0,22 | 6,63  | 2,56 | 40  | 1755 | 34890  | 535200  | 6,51906 | 0,1832 |
| Pelobacter propionicus DSM 2379                 | Mesophilic        | 30C         | 0,22 | 6,94  | 1,97 | 60  | 3804 | 77547  | 1240249 | 6,25253 | 0,1529 |
| Pelodictyon luteolum DSM 273                    | Mesophilic        | 25C         | 0,22 | 6,62  | 1,44 | 24  | 2083 | 40106  | 700673  | 5,72393 | 0,1744 |
| Pelotomaculum thermopropionicum SI              | Thermophilic      | 55C         | 0,2  | 4,83  | 1,34 | 31  | 2920 | 35374  | 868388  | 4,07352 | 0,1625 |
| Petrotoga mobilis SJ95                          | Thermophilic      | ND          | 0,16 | 2,36  | 0,42 | 6   | 1898 | 13358  | 642353  | 2,07954 | 0,1804 |
| Photobacterium profundum SS9                    | Psychrophilic     | 15C         | 0,2  | 4,72  | 1,11 | 55  | 5489 | 85252  | 1733919 | 4,91672 | 0,1937 |
| Picrophilus torridus DSM 9790                   | Thermophilic      | 60C         | 0,14 | 1,94  | 0,59 | 7   | 1535 | 6056   | 471359  | 1,2848  | 0,1077 |
| Polaromonas naphthalenivorans CJ2               | Mesophilic        | 20C         | 0,24 | 8,45  | 2,86 | 124 | 5453 | 118074 | 1714773 | 6,88569 | 0,1952 |
| Polaromonas sp. JS666                           | Mesophilic        | 20C         | 0,24 | 7,91  | 2,44 | 146 | 4929 | 115482 | 1575666 | 7,32909 | 0,1736 |
| Porphyromonas gingivalis W83                    | Mesophilic        | 37C         | 0,2  | 5,55  | 1,83 | 31  | 1909 | 27836  | 643202  | 4,32772 | 0,1548 |
| Propionibacterium acnes KPA171202               | Mesophilic        | 37C         | 0,29 | 13,62 | 5,53 | 109 | 2297 | 94292  | 761895  | 12,376  | 0,1907 |
| Pseudoalteromonas haloplanktis TAC125           | Psychrophilic     | ND          | 0,2  | 4,67  | 1,41 | 40  | 3486 | 48053  | 1116827 | 4,30264 | 0,1790 |
| Pseudomonas aeruginosa PA7                      | Mesophilic        | 25-30C      | 0,24 | 9,2   | 4,22 | 96  | 5568 | 119146 | 1861588 | 6,40023 | 0,1522 |
| Pseudomonas aeruginosa PAO1                     | Mesophilic        | 25-30C      | 0,23 | 6,9   | 1,89 | 259 | 6286 | 138811 | 1961256 | 7,07766 | 0,1560 |
| Pseudomonas aeruginosa UCBPP-PA14               | Mesophilic        | 25-30C      | 0,23 | 7,19  | 2,1  | 112 | 5892 | 128097 | 1942833 | 6,59331 | 0,1547 |
| Pseudomonas fluorescens Pf-5                    | Mesophilic        | 25-30C      | 0,22 | 6,83  | 2,02 | 109 | 6138 | 129459 | 2087344 | 6,20209 | 0,1603 |
| Psychrobacter cryohalolentis K5                 | Psychrophilic     | ND          | 0,23 | 7,98  | 2,39 | 54  | 2511 | 63463  | 855759  | 7,41599 | 0,1242 |
| Psychrobacter sp. PRwf-1                        | Mesophilic        | 4-37C       | 0,24 | 9,21  | 2,94 | 64  | 2385 | 81068  | 826440  | 9,8093  | 0,1781 |
| Psychromonas ingrahamii 37                      | Psychrophilic     | ND          | 0,18 | 3,69  | 0,85 | 29  | 3545 | 40918  | 1176783 | 3,47711 | 0,1904 |
| Pyrobaculum aerophilum str. IM2                 | Hyperthermophilic | 100C        | 0,14 | 2,36  | 0,65 | 17  | 2605 | 11295  | 655910  | 1,72204 | 0,2132 |
| Pyrobaculum arsenaticum DSM 13514               | Hyperthermophilic | ND          | 0,14 | 2,22  | 0,48 | 8   | 2299 | 10654  | 611416  | 1,74251 | 0,1874 |
| Pyrobaculum caldifontis JCM 11548               | Hyperthermophilic | 90-95C      | 0,14 | 2,13  | 0,47 | 7   | 2149 | 10486  | 605656  | 1,73135 | 0,2182 |
| Pyrobaculum islandicum DSM 4184                 | Thermophilic      | 100C        | 0,14 | 2,42  | 0,71 | 10  | 1978 | 9231   | 528999  | 1,74499 | 0,2135 |
| Pyrococcus abyssi GE5                           | Hyperthermophilic | 103C        | 0,14 | 1,65  | 0,26 | 3   | 1898 | 7629   | 549764  | 1,38769 | 0,1926 |
| Pyrococcus furiosus DSM 3638                    | Hyperthermophilic | 100C        | 0,14 | 1,86  | 0,47 | 8   | 2125 | 8182   | 586906  | 1,39409 | 0,2319 |
| Pyrococcus horikoshii OT3                       | Hyperthermophilic | 98C         | 0,14 | 1,88  | 0,46 | 7   | 1955 | 7857   | 548155  | 1,43335 | 0,2147 |
| Ralstonia eutropha H16                          | Mesophilic        | 30C         | 0,25 | 8,64  | 2,85 | 163 | 6626 | 165647 | 2161404 | 7,66386 | 0,1485 |
| Ralstonia eutropha JMP134                       | Mesophilic        | 30C         | 0,25 | 8,84  | 3,09 | 185 | 6446 | 167235 | 2113107 | 7,91418 | 0,2130 |
| Ralstonia metallidurans CH34                    | Mesophilic        | 30C         | 0,25 | 9,26  | 2,99 | 154 | 6319 | 169351 | 2038372 | 8,30815 | 0,1288 |
| Renibacterium salmoninarum ATCC 33209           | Mesophilic        | 15C         | 0,26 | 10,48 | 5,08 | 153 | 3507 | 89701  | 946584  | 9,47629 | 0,2053 |
| Rhizobium leguminosarum bv. viciae 3841         | Mesophilic        | 25-30C      | 0,24 | 7,91  | 2,94 | 180 | 7143 | 152541 | 2231743 | 6,83506 | 0,1880 |
| Rhodobacter sphaeroides ATCC 17025              | Mesophilic        | 25-35C      | 0,26 | 10,41 | 4,2  | 155 | 4333 | 121863 | 1334338 | 9,13284 | 0,1960 |
| Rhodobacter sphaeroides ATCC 17029              | Mesophilic        | 25-35C      | 0,25 | 9,43  | 3,61 | 137 | 4132 | 112619 | 1320298 | 8,52982 | 0,1445 |
| Rhodococcus sp. RHA1                            | Mesophilic        | 30C         | 0,31 | 16,08 | 8,58 | 711 | 9145 | 382763 | 2889415 | 13,2471 | 0,1434 |
| Rhodoferax ferrireducens T118                   | Mesophilic        | 25C         | 0,22 | 6,42  | 1,72 | 67  | 4418 | 83366  | 1478398 | 5,63894 | 0,1468 |
| Rhodopseudomonas palustris BisA53               | Mesophilic        | 25-30C      | 0,25 | 10,06 | 4,14 | 186 | 4878 | 135209 | 1570051 | 8,61176 | 0,2219 |
| Rhodopseudomonas palustris BisB18               | Mesophilic        | 25-30C      | 0,25 | 9,99  | 4,46 | 196 | 4886 | 129802 | 1567480 | 8,28094 | 0,1724 |
| Rhodopseudomonas palustris BisB5                | Mesophilic        | 25-30C      | 0,25 | 10,12 | 4,53 | 174 | 4397 | 125150 | 1412295 | 8,86146 | 0,1857 |
| Rhodopseudomonas palustris CGA009               | Mesophilic        | 25-35C      | 0,25 | 9,64  | 3,98 | 166 | 4820 | 133055 | 1582923 | 8,40565 | 0,1288 |
| Rhodopseudomonas palustris HaA2                 | Mesophilic        | 25-30C      | 0,25 | 9,69  | 4,06 | 180 | 4683 | 129691 | 1546520 | 8,38599 | 0,2198 |
| Rhodospirillum rubrum ATCC 11170                | Mesophilic        | 25-30C      | 0,25 | 9,28  | 3,54 | 112 | 3841 | 106006 | 1293864 | 8,19298 | 0,1793 |
| Roseiflexus castenholzii DSM 13941              | Thermophilic      | 50C         | 0,22 | 7,19  | 2,24 | 89  | 4330 | 111819 | 1564659 | 7,14654 | 0,1527 |
| Roseiflexus sp. RS-1                            | Thermophilic      | ND          | 0,22 | 7,55  | 2,15 | 84  | 4517 | 125178 | 1641453 | 7,62605 | 0,1800 |
| Rubrobacter xylanophilus DSM 9941               | Thermophilic      | 60C         | 0,27 | 10,59 | 2,93 | 75  | 3140 | 95454  | 985393  | 9,6869  | 0,1804 |
| Saccharophagus degradans 2-40                   | Mesophilic        | 4-37C       | 0,22 | 6,25  | 1,52 | 54  | 4008 | 96793  | 1457661 | 6,6403  | 0,2261 |
| Saccharopolyspora erythraea NRRL 2338           | Mesophilic        | 25-32 (28)C | 0,31 | 16,35 | 8,36 | 503 | 7197 | 356241 | 2317888 | 15,3692 | 0,1870 |

|                                                          |                   |        |      |       |       |     |      |        |         |         |        |
|----------------------------------------------------------|-------------------|--------|------|-------|-------|-----|------|--------|---------|---------|--------|
| Salinibacter ruber DSM 13855                             | Mesophilic        | 37-47C | 0,35 | 22,62 | 12,14 | 291 | 2833 | 223011 | 1011954 | 22,0377 | 0,1363 |
| Salinispora tropica CNB-440                              | Mesophilic        | 28C    | 0,3  | 15,53 | 7,45  | 288 | 4536 | 220640 | 1520499 | 14,511  | 0,1810 |
| Salmonella enterica subsp. enterica serovar Choleraesuis | Mesophilic        | 37C    | 0,21 | 6,15  | 2,19  | 96  | 4648 | 77380  | 1375501 | 5,62559 | 0,2042 |
| Salmonella enterica subsp. enterica serovar Paratyphi B  | Mesophilic        | 37C    | 0,2  | 6,5   | 2,87  | 146 | 5601 | 79869  | 1446025 | 5,52335 | 0,1656 |
| Salmonella typhimurium LT2                               | Mesophilic        | 37C    | 0,21 | 5,92  | 1,81  | 75  | 4527 | 78600  | 1419886 | 5,53566 | 0,1524 |
| Shewanella amazonensis SB2B                              | Mesophilic        | 37C    | 0,21 | 5,41  | 1,21  | 40  | 3645 | 67014  | 1261259 | 5,31326 | 0,1369 |
| Shewanella denitrificans OS217                           | Mesophilic        | 20-25C | 0,2  | 4,94  | 1,36  | 49  | 3754 | 62371  | 1276492 | 4,88613 | 0,1791 |
| Shewanella frigidimarina NCIMB 400                       | Mesophilic        | 20-22C | 0,2  | 4,76  | 1,14  | 45  | 4029 | 62003  | 1355375 | 4,5746  | 0,1530 |
| Shewanella sediminis HAW-EB3                             | Psychrophilic     | 10C    | 0,21 | 5,22  | 1,22  | 50  | 4497 | 78935  | 1524193 | 5,17881 | 0,1835 |
| Shewanella woodyi ATCC 51908                             | Mesophilic        | 25C    | 0,2  | 4,75  | 1,09  | 52  | 4880 | 89996  | 1679397 | 5,35883 | 0,1513 |
| Shigella boydii Sb227                                    | Mesophilic        | 37C    | 0,22 | 6,54  | 1,87  | 70  | 4285 | 67447  | 1240038 | 5,43911 | 0,1866 |
| Shigella dysenteriae Sd197                               | Mesophilic        | 37C    | 0,22 | 5,4   | 1,46  | 59  | 4506 | 60832  | 1168017 | 5,20814 | 0,1783 |
| Shigella flexneri 2a str. 2457T                          | Mesophilic        | 37C    | 0,22 | 6,06  | 1,62  | 55  | 4445 | 69514  | 1282744 | 5,41916 | 0,1555 |
| Shigella flexneri 2a str. 301                            | Mesophilic        | 37C    | 0,22 | 6,22  | 1,69  | 58  | 4068 | 62442  | 1183933 | 5,27412 | 0,1759 |
| Shigella flexneri 5 str. 8401                            | Mesophilic        | 37C    | 0,22 | 6,07  | 1,43  | 53  | 4116 | 65005  | 1228721 | 5,29046 | 0,1868 |
| Shigella sonnei Ss046                                    | Mesophilic        | 37C    | 0,22 | 5,85  | 1,65  | 69  | 4475 | 72360  | 1348708 | 5,36513 | 0,1601 |
| Sinorhizobium medicae WSM419                             | Mesophilic        | 28C    | 0,24 | 8,36  | 3,43  | 190 | 6213 | 135931 | 1938198 | 7,01327 | 0,2014 |
| Sinorhizobium meliloti 1021                              | Mesophilic        | 25-30C | 0,24 | 8,44  | 3,29  | 187 | 6205 | 135449 | 1917146 | 7,06514 | 0,1696 |
| Solibacter usitatus Ellin6076                            | Mesophilic        | 30C    | 0,25 | 8,32  | 2,26  | 143 | 7826 | 230342 | 2997215 | 7,6852  | 0,1624 |
| Staphylococcus aureus subsp. aureus COL                  | Mesophilic        | 30-37C | 0,21 | 6,49  | 3,63  | 81  | 2618 | 58593  | 788421  | 7,43169 | 0,1939 |
| Staphylococcus aureus subsp. aureus JH1                  | Mesophilic        | 30-37C | 0,21 | 6,71  | 3,53  | 86  | 2780 | 53713  | 766424  | 7,00826 | 0,1419 |
| Staphylococcus aureus subsp. aureus JH9                  | Mesophilic        | 30-37C | 0,21 | 6,78  | 3,56  | 85  | 2726 | 63788  | 772955  | 8,25249 | 0,1456 |
| Staphylococcus aureus subsp. aureus MRSA252              | Mesophilic        | 30-37C | 0,21 | 6,3   | 3,24  | 73  | 2656 | 66397  | 816155  | 8,13534 | 0,1429 |
| Staphylococcus aureus subsp. aureus MSSA476              | Mesophilic        | 30-37C | 0,2  | 6,42  | 3,46  | 76  | 2598 | 66179  | 813148  | 8,13862 | 0,2090 |
| Staphylococcus aureus subsp. aureus Mu3                  | Mesophilic        | 3-37C  | 0,21 | 6,49  | 3,41  | 78  | 2698 | 64400  | 802271  | 8,02721 | 0,1657 |
| Staphylococcus aureus subsp. aureus Mu50                 | Mesophilic        | 30-37C | 0,21 | 6,52  | 3,44  | 79  | 2731 | 64440  | 808163  | 7,97364 | 0,1614 |
| Staphylococcus aureus subsp. aureus MW2                  | Mesophilic        | 30-37C | 0,21 | 6,45  | 3,5   | 78  | 2632 | 63417  | 784009  | 8,08881 | 0,1917 |
| Staphylococcus aureus subsp. aureus N315                 | Mesophilic        | 30-37C | 0,21 | 6,33  | 3,32  | 74  | 2619 | 62195  | 787210  | 7,90069 | 0,1724 |
| Staphylococcus aureus subsp. aureus NCTC 8325            | Mesophilic        | 30-37C | 0,2  | 6,54  | 3,56  | 95  | 2892 | 63471  | 797443  | 7,95931 | 0,1592 |
| Staphylococcus aureus subsp. aureus USA300               | Mesophilic        | 37C    | 0,21 | 6,66  | 3,53  | 80  | 2604 | 64029  | 796141  | 8,04242 | 0,2086 |
| Staphylococcus aureus subsp. aureus USA300_T438          | Mesophilic        | 37C    | 0,2  | 6,22  | 3,21  | 78  | 2683 | 59196  | 772140  | 7,66649 | 0,1744 |
| Staphylococcus epidermidis ATCC 12228                    | Mesophilic        | 30-37C | 0,21 | 7,31  | 3,66  | 83  | 2485 | 60223  | 711855  | 8,46001 | 0,1862 |
| Staphylococcus epidermidis RP62A                         | Mesophilic        | 30-37C | 0,21 | 6,76  | 3,13  | 70  | 2526 | 61280  | 725515  | 8,44641 | 0,2212 |
| Staphylococcus haemolyticus JCSC1435                     | Mesophilic        | 30-37C | 0,21 | 6,9   | 3,33  | 88  | 2676 | 63668  | 767364  | 8,29698 | 0,1736 |
| Staphylothermus marinus F1                               | Hyperthermophilic | 92C    | 0,12 | 1,74  | 0,32  | 3   | 1570 | 5660   | 454821  | 1,24445 | 0,1902 |
| Streptococcus agalactiae 2603V/R                         | Mesophilic        | 37C    | 0,19 | 4,65  | 1,51  | 33  | 2124 | 29121  | 621081  | 4,68876 | 0,1731 |
| Streptococcus agalactiae A909                            | Mesophilic        | 37C    | 0,19 | 4,64  | 1,5   | 31  | 1996 | 29041  | 609422  | 4,76534 | 0,1958 |
| Streptococcus agalactiae NEM316                          | Mesophilic        | 37C    | 0,19 | 5,22  | 2,05  | 41  | 2094 | 33859  | 644518  | 5,25338 | 0,1404 |
| Streptococcus gordonii str. Challis substr. CH1          | Mesophilic        | 37C    | 0,19 | 5,06  | 2,1   | 38  | 2051 | 41285  | 642413  | 6,42655 | 0,1931 |
| Streptococcus mutans UA159                               | Mesophilic        | 37C    | 0,18 | 3,99  | 1,33  | 27  | 1960 | 23356  | 579731  | 4,02877 | 0,1383 |
| Streptococcus pneumoniae D39                             | Mesophilic        | 30-35C | 0,19 | 4,54  | 1,83  | 34  | 1914 | 27681  | 568862  | 4,86603 | 0,1558 |
| Streptococcus pneumoniae R6                              | Mesophilic        | 30-35C | 0,19 | 4,23  | 1,57  | 28  | 2043 | 28162  | 588817  | 4,78281 | 0,2022 |
| Streptococcus pneumoniae TIGR4                           | Mesophilic        | 30-35C | 0,18 | 4,57  | 2,14  | 39  | 2105 | 27138  | 599453  | 4,52713 | 0,1584 |
| Streptococcus pyogenes M1 GAS                            | Mesophilic        | 30-35C | 0,2  | 5,06  | 2,06  | 29  | 1697 | 25226  | 515662  | 4,89196 | 0,1625 |
| Streptococcus pyogenes MGAS10394                         | Mesophilic        | 35C    | 0,2  | 5,15  | 1,86  | 27  | 1745 | 23753  | 512089  | 4,63845 | 0,1557 |
| Streptococcus pyogenes MGAS315                           | Mesophilic        | 30-35C | 0,2  | 4,88  | 1,88  | 33  | 1886 | 27784  | 550166  | 5,05011 | 0,1347 |
| Streptococcus pyogenes MGAS5005                          | Mesophilic        | 35C    | 0,19 | 4,85  | 1,98  | 30  | 1865 | 25869  | 541788  | 4,77475 | 0,1165 |
| Streptococcus pyogenes MGAS6180                          | Mesophilic        | 35C    | 0,19 | 5,19  | 2,38  | 33  | 1865 | 24833  | 529358  | 4,69115 | 0,1895 |

|                                                   |                   |             |      |       |       |     |      |        |         |         |        |
|---------------------------------------------------|-------------------|-------------|------|-------|-------|-----|------|--------|---------|---------|--------|
| Streptococcus pyogenes MGAS8232                   | Mesophilic        | 30-35C      | 0,2  | 4,96  | 1,69  | 41  | 1894 | 30159  | 548400  | 5,49945 | 0,1641 |
| Streptococcus pyogenes SSI-1                      | Mesophilic        | 30-35C      | 0,2  | 4,95  | 1,93  | 25  | 1839 | 25674  | 535851  | 4,79126 | 0,1935 |
| Streptococcus pyogenes str. Manfredo              | Mesophilic        | 30-35C      | 0,2  | 4,95  | 1,72  | 30  | 1861 | 25638  | 534381  | 4,7977  | 0,2045 |
| Streptococcus suis 05ZYH33                        | Mesophilic        | 37C         | 0,19 | 4,57  | 1,83  | 36  | 2186 | 29023  | 610698  | 4,75243 | 0,1440 |
| Streptococcus suis 98HAH33                        | Mesophilic        | 37C         | 0,19 | 4,51  | 1,65  | 34  | 2185 | 28566  | 610686  | 4,67769 | 0,1805 |
| Streptococcus thermophilus CNRZ1066               | Thermophilic      | 45C         | 0,2  | 4,88  | 2,14  | 35  | 1915 | 21265  | 500777  | 4,2464  | 0,1685 |
| Streptococcus thermophilus LMD-9                  | Mesophilic        | 37C         | 0,2  | 5,62  | 2,56  | 42  | 1716 | 22034  | 475746  | 4,63146 | 0,1552 |
| Streptococcus thermophilus LMG 18311              | Thermophilic      | 45C         | 0,2  | 4,94  | 2,17  | 34  | 1889 | 21912  | 501240  | 4,37156 | 0,1885 |
| Streptomyces avermitilis MA-4680                  | Mesophilic        | 25-35 (26)C | 0,32 | 17,91 | 8,99  | 561 | 7676 | 442540 | 2614811 | 16,9244 | 0,1873 |
| Streptomyces coelicolor A3(2)                     | Mesophilic        | 25-35C      | 0,34 | 19,45 | 10,06 | 671 | 8154 | 491025 | 2661507 | 18,4491 | 0,1326 |
| Sulfolobus acidocaldarius DSM 639                 | Thermophilic      | 70-75C      | 0,14 | 1,74  | 0,27  | 5   | 2223 | 7869   | 632187  | 1,24473 | 0,1536 |
| Sulfolobus solfataricus P2                        | Hyperthermophilic | 85C         | 0,13 | 1,48  | 0,24  | 7   | 2977 | 8769   | 840528  | 1,04327 | 0,1757 |
| Sulfolobus tokodaii str. 7                        | Hyperthermophilic | 80C         | 0,12 | 1,58  | 0,46  | 10  | 2825 | 8452   | 759190  | 1,11329 | 0,1757 |
| Synechococcus sp. PCC 7002                        | Mesophilic        | 38C         | 0,22 | 7,14  | 2,76  | 77  | 3186 | 66326  | 990621  | 6,6954  | 0,2084 |
| Syntrophobacter fumaroxidans MPOB                 | Mesophilic        | 37C         | 0,23 | 8,12  | 3,72  | 139 | 4064 | 88146  | 1363806 | 6,46324 | 0,1779 |
| Syntrophus aciditrophicus SB                      | Mesophilic        | 35C         | 0,21 | 6,19  | 1,93  | 60  | 3168 | 44509  | 940750  | 4,73123 | 0,1485 |
| Thermoanaerobacter pseudethanolicus ATCC 33       | Thermophilic      | ND          | 0,16 | 2,62  | 0,94  | 18  | 2243 | 13955  | 681995  | 2,0462  | 0,2046 |
| Thermoanaerobacter sp. X514                       | Thermophilic      | 60C         | 0,16 | 2,44  | 0,72  | 12  | 2588 | 13991  | 778470  | 1,79724 | 0,1769 |
| Thermoanaerobacter tengcongensis MB4              | Hyperthermophilic | 75C         | 0,16 | 2,14  | 0,54  | 16  | 2349 | 13569  | 708708  | 1,91461 | 0,2265 |
| Thermobifida fusca YX                             | Thermophilic      | 50-55C      | 0,3  | 15,37 | 7,01  | 190 | 3110 | 147391 | 1030353 | 14,3049 | 0,1667 |
| Thermofilum pendens Hrk 5                         | Hyperthermophilic | 88C         | 0,16 | 2,54  | 0,43  | 6   | 1876 | 10122  | 544101  | 1,86032 | 0,2079 |
| Thermoplasma acidophilum DSM 1728                 | Thermophilic      | 59C         | 0,17 | 2,5   | 0,4   | 4   | 1482 | 9194   | 454297  | 2,02379 | 0,2084 |
| Thermoplasma volcanium GSS1                       | Thermophilic      | 60C         | 0,16 | 2,51  | 0,53  | 5   | 1499 | 8602   | 450122  | 1,91104 | 0,2130 |
| Thermosiphon melanesiensis B1429                  | Thermophilic      | 70C         | 0,13 | 1,46  | 0,27  | 5   | 1879 | 6269   | 582244  | 1,0767  | 0,1795 |
| Thermosynechococcus elongatus BP-1                | Thermophilic      | 55C         | 0,21 | 6,28  | 1,7   | 35  | 2476 | 42738  | 774371  | 5,51906 | 0,1748 |
| Thermotoga lettingae TMO                          | Hyperthermophilic | 65C         | 0,14 | 1,58  | 0,29  | 6   | 2040 | 7941   | 668518  | 1,18785 | 0,1886 |
| Thermotoga maritima MSB8                          | Hyperthermophilic | 80C         | 0,16 | 2,57  | 0,75  | 14  | 1858 | 10780  | 584963  | 1,84285 | 0,2106 |
| Thermotoga petrophila RKU-1                       | Hyperthermophilic | 80C         | 0,16 | 2,21  | 0,45  | 8   | 1785 | 9849   | 574004  | 1,71584 | 0,2437 |
| Thermus thermophilus HB27                         | Thermophilic      | 68C         | 0,21 | 5,24  | 1,31  | 25  | 2210 | 32545  | 670210  | 4,85594 | 0,1979 |
| Thermus thermophilus HB8                          | Thermophilic      | ND          | 0,21 | 5,62  | 1,79  | 34  | 2238 | 32262  | 667505  | 4,83322 | 0,1818 |
| Thiobacillus denitrificans ATCC 25259             | Mesophilic        | 28-32C      | 0,24 | 8,08  | 2,97  | 74  | 2827 | 61974  | 894776  | 6,9262  | 0,1639 |
| Thiomicrospira crunogena XCL-2                    | Mesophilic        | 28-32C      | 0,23 | 6,56  | 1,87  | 30  | 2196 | 43222  | 725298  | 5,95921 | 0,2119 |
| Treponema denticola ATCC 35405                    | Mesophilic        | 30-42C      | 0,16 | 3,39  | 1,08  | 28  | 2767 | 28899  | 866832  | 3,33386 | 0,0908 |
| Tropheryma whipplei str. Twist                    | Mesophilic        | 37C         | 0,19 | 6,01  | 2,85  | 17  | 808  | 14324  | 265157  | 5,40208 | 0,1625 |
| Vibrio cholerae O1 biovar eltor str. N16961       | Mesophilic        | 20-30C      | 0,2  | 5,12  | 1,75  | 54  | 3835 | 53919  | 1166196 | 4,62349 | 0,1639 |
| Vibrio cholerae O395                              | Mesophilic        | 20-30C      | 0,2  | 5,24  | 1,55  | 53  | 3875 | 57419  | 1207459 | 4,75536 | 0,1611 |
| Vibrio Harveyi ATCC BAA-1116                      | Mesophilic        | 20-30C      | 0,21 | 6,11  | 1,83  | 105 | 6055 | 101243 | 1726505 | 5,86404 | 0,1227 |
| Vibrio parahaemolyticus RIMD 2210633              | Mesophilic        | 20-30C      | 0,21 | 5,5   | 1,59  | 69  | 4832 | 80678  | 1492202 | 5,40664 | 0,1803 |
| Vibrio vulnificus CMCP6                           | Mesophilic        | 20-30C      | 0,21 | 5,2   | 1,47  | 52  | 4484 | 71460  | 1446965 | 4,93861 | 0,1917 |
| Vibrio vulnificus YJ016                           | Mesophilic        | 20-30C      | 0,2  | 5,39  | 1,89  | 87  | 5024 | 76204  | 1557222 | 4,89359 | 0,1704 |
| Xanthomonas axonopodis pv. citri str. 306         | Mesophilic        | 25-30C      | 0,26 | 10,55 | 4,02  | 160 | 4181 | 137418 | 1431661 | 9,5985  | 0,1718 |
| Xanthomonas campestris pv. campestris str. 800    | Mesophilic        | 25-30C      | 0,26 | 10,78 | 4,45  | 172 | 4273 | 140364 | 1450946 | 9,67396 | 0,1940 |
| Xanthomonas campestris pv. vesicatoria str. 85    | Mesophilic        | 25-30C      | 0,27 | 11,55 | 4,99  | 207 | 4726 | 162968 | 1572380 | 10,3644 | 0,1383 |
| Xylella fastidiosa 9a5c                           | Mesophilic        | 26-28C      | 0,23 | 10,23 | 5,61  | 152 | 2832 | 63444  | 756399  | 8,38764 | 0,1936 |
| Xylella fastidiosa Temecula1                      | Mesophilic        | 26-28C      | 0,23 | 7,88  | 2,26  | 47  | 2036 | 47824  | 654382  | 7,30827 | 0,2011 |
| Yersinia enterocolitica subsp. enterocolitica 808 | Mesophilic        | 28-30C      | 0,21 | 5,47  | 1,36  | 46  | 4051 | 66910  | 1298267 | 5,15379 | 0,1764 |
| Yersinia pestis CO92                              | Mesophilic        | 28-30C      | 0,21 | 5,6   | 1,48  | 51  | 4066 | 70950  | 1285246 | 5,52034 | 0,1572 |
| Yersinia pestis KIM                               | Mesophilic        | 28-30C      | 0,21 | 6,03  | 1,9   | 70  | 4202 | 71939  | 1299885 | 5,53426 | 0,2211 |

|                                      |            |        |      |      |      |    |      |       |        |         |        |
|--------------------------------------|------------|--------|------|------|------|----|------|-------|--------|---------|--------|
| Zymomonas mobilis subsp. mobilis ZM4 | Mesophilic | 25-30C | 0,24 | 9,34 | 4,25 | 76 | 1998 | 48852 | 588985 | 8,29427 | 0,1908 |
|--------------------------------------|------------|--------|------|------|------|----|------|-------|--------|---------|--------|
