# Supplementary material for: Reduction in Structural Disorder and Functional Complexity in the Thermal Adaptation of Prokaryotes
Source: PubMed Central journal article supplement (PMC2920320; doi:10.1371/journal.pone.0012069), 2010-08-11
Supplement: pone.0012069.s004.pdf [file pone.0012069.s004.pdf]

| SwissProt ID | Thermal category | protein length | Frequency of disordered residues |
|--------------|------------------|----------------|----------------------------------|
| AADR_RHOPA   | Mesophiles       | 239            | 0.0000                           |
| AAER_ECO57   | Mesophiles       | 309            | 0.0032                           |
| ABGR_ECOLI   | Mesophiles       | 302            | 0.0000                           |
| ACNR_CORDI   | Mesophiles       | 190            | 0.0421                           |
| ACNR_COREF   | Mesophiles       | 188            | 0.0691                           |
| ACNR_CORGL   | Mesophiles       | 188            | 0.0904                           |
| ACOR_BACSU   | Mesophiles       | 605            | 0.0149                           |
| ACOR_RALEH   | Mesophiles       | 668            | 0.1003                           |
| ACRR_ECOL6   | Mesophiles       | 215            | 0.0326                           |
| ADAA_BACSU   | Mesophiles       | 211            | 0.1469                           |
| ADA_ECOLI    | Mesophiles       | 354            | 0.0254                           |
| ADA_MYCTU    | Mesophiles       | 496            | 0.0181                           |
| ADA_SALTY    | Mesophiles       | 353            | 0.0000                           |
| ADCR_STRP6   | Mesophiles       | 147            | 0.0068                           |
| ADHR_BACSU   | Mesophiles       | 140            | 0.1500                           |
| ADYI_ECOLI   | Mesophiles       | 253            | 0.0040                           |
| AGAR_ECO57   | Mesophiles       | 269            | 0.1599                           |
| AGGR_ECOLX   | Mesophiles       | 265            | 0.0000                           |
| AGMR_PSEAE   | Mesophiles       | 221            | 0.1041                           |
| AHYR_AERHY   | Mesophiles       | 260            | 0.0000                           |
| ALGB_PSEAE   | Mesophiles       | 449            | 0.0423                           |
| ALLS_ECO57   | Mesophiles       | 308            | 0.0032                           |
| ALLS_ECOK1   | Mesophiles       | 308            | 0.0032                           |
| ALLS_ECOL5   | Mesophiles       | 308            | 0.0032                           |
| ALLS_KLEPN   | Mesophiles       | 270            | 0.0074                           |
| ALLS_SALTY   | Mesophiles       | 308            | 0.0000                           |
| ALSR_BACSU   | Mesophiles       | 302            | 0.0331                           |
| AMPR_PSEAE   | Mesophiles       | 296            | 0.0000                           |
| AMPR_YEREN   | Mesophiles       | 294            | 0.0000                           |
| ANR_PSEAE    | Mesophiles       | 244            | 0.0041                           |
| APPY_ECOLI   | Mesophiles       | 249            | 0.0000                           |
| ARAC_ECO57   | Mesophiles       | 292            | 0.0000                           |
| ARAC_SALTY   | Mesophiles       | 281            | 0.0036                           |
| ARAR_BACSU   | Mesophiles       | 362            | 0.0525                           |
| ARGR1_BACC1  | Mesophiles       | 149            | 0.0000                           |
| ARGR1_BACCR  | Mesophiles       | 149            | 0.0000                           |
| ARGR1_CLOPE  | Mesophiles       | 151            | 0.0000                           |
| ARGR1_LACPL  | Mesophiles       | 153            | 0.0850                           |
| ARGR1_STRP1  | Mesophiles       | 157            | 0.0127                           |
| ARGR2_BACC1  | Mesophiles       | 149            | 0.0067                           |
| ARGR2_BACCR  | Mesophiles       | 149            | 0.0067                           |
| ARGR2_CLOPE  | Mesophiles       | 150            | 0.0000                           |
| ARGR2_LACPL  | Mesophiles       | 152            | 0.0132                           |
| ARGR2_STRP1  | Mesophiles       | 145            | 0.0069                           |
| ARGR2_STRP3  | Mesophiles       | 145            | 0.0069                           |
| ARGR2_STRP6  | Mesophiles       | 145            | 0.0069                           |
| ARGR_AERHH   | Mesophiles       | 156            | 0.0128                           |
| ARGR_ANADE   | Mesophiles       | 163            | 0.1043                           |
| ARGR_BACFN   | Mesophiles       | 157            | 0.0000                           |

|            |                   |     |        |
|------------|-------------------|-----|--------|
| ARGR_BACFR | Mesophiles        | 157 | 0.0000 |
| ARGR_BACSU | Mesophiles        | 149 | 0.0201 |
| ARGR_BIFAA | Mesophiles        | 172 | 0.1977 |
| ARGR_BIFLD | Mesophiles        | 170 | 0.1176 |
| ARGR_BIFLO | Mesophiles        | 170 | 0.1118 |
| ARGR_CALS8 | Thermophiles      | 152 | 0.0000 |
| ARGR_CARHZ | Hyperthermophiles | 150 | 0.0000 |
| ARGR_CHLCV | Mesophiles        | 147 | 0.0000 |
| ARGR_CHLTE | Thermophiles      | 149 | 0.0470 |
| ARGR_CLOAB | Mesophiles        | 150 | 0.0000 |
| ARGR_CLOB1 | Mesophiles        | 150 | 0.0000 |
| ARGR_CLOBA | Mesophiles        | 150 | 0.0000 |
| ARGR_CLOBB | Mesophiles        | 150 | 0.0000 |
| ARGR_CLOBK | Mesophiles        | 150 | 0.0000 |
| ARGR_CLOBM | Mesophiles        | 150 | 0.0000 |
| ARGR_CLOPH | Mesophiles        | 152 | 0.0000 |
| ARGR_CLOTE | Mesophiles        | 153 | 0.0000 |
| ARGR_CLOTH | Thermophiles      | 153 | 0.0000 |
| ARGR_COLP3 | Psychrophiles     | 157 | 0.0000 |
| ARGR_CORDI | Mesophiles        | 163 | 0.1104 |
| ARGR_COREF | Mesophiles        | 177 | 0.2147 |
| ARGR_CORGB | Mesophiles        | 171 | 0.1754 |
| ARGR_DEIRA | Mesophiles        | 157 | 0.0000 |
| ARGR_DESRM | Mesophiles        | 152 | 0.0789 |
| ARGR_ECO24 | Mesophiles        | 156 | 0.0000 |
| ARGR_ECO45 | Mesophiles        | 156 | 0.0000 |
| ARGR_ENTFA | Mesophiles        | 151 | 0.0199 |
| ARGR_ENTS8 | Mesophiles        | 156 | 0.0000 |
| ARGR_GEOKA | Thermophiles      | 149 | 0.0067 |
| ARGR_GEOTN | Thermophiles      | 149 | 0.0067 |
| ARGR_HAEDU | Mesophiles        | 153 | 0.0000 |
| ARGR_HAEI8 | Mesophiles        | 151 | 0.0000 |
| ARGR_HAEIE | Mesophiles        | 151 | 0.0000 |
| ARGR_HAEIG | Mesophiles        | 151 | 0.0000 |
| ARGR_HAEIN | Mesophiles        | 151 | 0.0000 |
| ARGR_HAES1 | Mesophiles        | 155 | 0.0000 |
| ARGR_HAES2 | Mesophiles        | 155 | 0.0000 |
| ARGR_HELMI | Thermophiles      | 151 | 0.0993 |
| ARGR_KLEP3 | Mesophiles        | 156 | 0.0000 |
| ARGR_LACDA | Mesophiles        | 157 | 0.0064 |
| ARGR_LACLA | Mesophiles        | 152 | 0.0000 |
| ARGR_LACLM | Mesophiles        | 152 | 0.0000 |
| ARGR_LISIN | Mesophiles        | 149 | 0.0000 |
| ARGR_LISMF | Mesophiles        | 149 | 0.0067 |
| ARGR_MANSM | Mesophiles        | 155 | 0.0000 |
| ARGR_MOOTA | Thermophiles      | 151 | 0.0000 |
| ARGR_MYCA1 | Mesophiles        | 164 | 0.0915 |
| ARGR_MYCBO | Mesophiles        | 170 | 0.1235 |
| ARGR_MYCLE | Mesophiles        | 167 | 0.1138 |
| ARGR_MYCUA | Mesophiles        | 166 | 0.0542 |

|             |                   |     |        |
|-------------|-------------------|-----|--------|
| ARGR_OCEIH  | Mesophiles        | 149 | 0.0000 |
| ARGR_PASMU  | Mesophiles        | 155 | 0.0000 |
| ARGR_PELLD  | Mesophiles        | 148 | 0.0068 |
| ARGR_PELTS  | Thermophiles      | 151 | 0.0000 |
| ARGR_PHOPR  | Psychrophiles     | 156 | 0.0128 |
| ARGR_PSYIN  | Psychrophiles     | 150 | 0.0133 |
| ARGR_RENSM  | Mesophiles        | 179 | 0.0000 |
| ARGR_SALTY  | Mesophiles        | 156 | 0.0000 |
| ARGR_SHEFN  | Mesophiles        | 156 | 0.0192 |
| ARGR_SHESH  | Psychrophiles     | 156 | 0.0128 |
| ARGR_SHEWM  | Mesophiles        | 156 | 0.0000 |
| ARGR_SOLUE  | Mesophiles        | 145 | 0.0759 |
| ARGR_STAA1  | Mesophiles        | 150 | 0.0000 |
| ARGR_STAEQ  | Mesophiles        | 150 | 0.0000 |
| ARGR_STAHJ  | Mesophiles        | 150 | 0.0000 |
| ARGR_STRAW  | Mesophiles        | 178 | 0.2584 |
| ARGR_STRCO  | Mesophiles        | 179 | 0.2682 |
| ARGR_STRGC  | Mesophiles        | 156 | 0.0000 |
| ARGR_STRMU  | Mesophiles        | 145 | 0.0000 |
| ARGR_STRPN  | Mesophiles        | 148 | 0.0000 |
| ARGR_STRSU  | Mesophiles        | 157 | 0.0000 |
| ARGR_THEMA  | Hyperthermophiles | 152 | 0.0000 |
| ARGR_THEP3  | Thermophiles      | 151 | 0.0000 |
| ARGR_THET2  | Thermophiles      | 164 | 0.0122 |
| ARGR_THETN  | Hyperthermophiles | 151 | 0.0000 |
| ARGR_VIBCH  | Mesophiles        | 156 | 0.0000 |
| ARGR_VIBHB  | Mesophiles        | 156 | 0.0128 |
| ARGR_VIBVU  | Mesophiles        | 156 | 0.0128 |
| ARGR_YERE8  | Mesophiles        | 156 | 0.0064 |
| ARGR_YERPA  | Mesophiles        | 156 | 0.0064 |
| ARSR1_ECOLX | Mesophiles        | 117 | 0.0000 |
| ARSR2_ECOLX | Mesophiles        | 117 | 0.0000 |
| ARSR_BACSU  | Mesophiles        | 105 | 0.0000 |
| ARSR_ECOLI  | Mesophiles        | 117 | 0.0000 |
| ARSR_STAAU  | Mesophiles        | 104 | 0.0000 |
| ASCG_ECOLI  | Mesophiles        | 337 | 0.0119 |
| ASNC_ECO57  | Mesophiles        | 152 | 0.0000 |
| ASNC_HAEIN  | Mesophiles        | 150 | 0.0000 |
| ATOC_ECOLI  | Mesophiles        | 461 | 0.0152 |
| AZLB_BACSU  | Mesophiles        | 157 | 0.0000 |
| BADR_RHOPA  | Mesophiles        | 175 | 0.0629 |
| BBUR_BORBR  | Mesophiles        | 325 | 0.0185 |
| BCNA_CLOPE  | Mesophiles        | 185 | 0.0000 |
| BETI1_CHRSD | Mesophiles        | 202 | 0.0446 |
| BETI2_CHRSD | Mesophiles        | 207 | 0.0193 |
| BETI_BRUA2  | Mesophiles        | 198 | 0.0051 |
| BETI_BRUME  | Mesophiles        | 198 | 0.0051 |
| BETI_BRUSI  | Mesophiles        | 198 | 0.0051 |
| BETI_BRUSU  | Mesophiles        | 198 | 0.0051 |
| BETI_BURM1  | Mesophiles        | 194 | 0.0309 |

|             |            |     |        |
|-------------|------------|-----|--------|
| BETI_BURTA  | Mesophiles | 195 | 0.0000 |
| BETI_BURXL  | Mesophiles | 195 | 0.0051 |
| BETI_ECO24  | Mesophiles | 195 | 0.0051 |
| BETI_ECO45  | Mesophiles | 195 | 0.0051 |
| BETI_ECO57  | Mesophiles | 195 | 0.0051 |
| BETI_ECO7I  | Mesophiles | 195 | 0.0051 |
| BETI_ECO8A  | Mesophiles | 195 | 0.0051 |
| BETI_ECODH  | Mesophiles | 195 | 0.0051 |
| BETI_ECOL5  | Mesophiles | 195 | 0.0051 |
| BETI_ECOL6  | Mesophiles | 195 | 0.0051 |
| BETI_ECOLU  | Mesophiles | 195 | 0.0051 |
| BETI_ECOSM  | Mesophiles | 195 | 0.0051 |
| BETI_ENTS8  | Mesophiles | 202 | 0.0594 |
| BETI_KLEP3  | Mesophiles | 195 | 0.0103 |
| BETI_PSEA7  | Mesophiles | 197 | 0.0102 |
| BETI_PSEF5  | Mesophiles | 197 | 0.0102 |
| BETI_PSEPF  | Mesophiles | 197 | 0.0102 |
| BETI_VIBHB  | Mesophiles | 199 | 0.0101 |
| BETI_VIBPA  | Mesophiles | 199 | 0.0101 |
| BETI_VIBVU  | Mesophiles | 198 | 0.0101 |
| BETI_VIBVY  | Mesophiles | 198 | 0.0152 |
| BETI_YERPA  | Mesophiles | 198 | 0.0101 |
| BGLJ_ECOLI  | Mesophiles | 175 | 0.0000 |
| BIGR_XYLFA  | Mesophiles | 114 | 0.1930 |
| BIGR_XYLFT  | Mesophiles | 114 | 0.1930 |
| BKDR_PSEAE  | Mesophiles | 153 | 0.0000 |
| BLTR_BACSU  | Mesophiles | 273 | 0.0000 |
| BMRR_BACSU  | Mesophiles | 278 | 0.0000 |
| BPHR_BURXL  | Mesophiles | 245 | 0.0653 |
| BSCR_BACSU  | Mesophiles | 194 | 0.0000 |
| BSDA_BACSU  | Mesophiles | 290 | 0.0000 |
| BTR_BORPE   | Mesophiles | 242 | 0.0083 |
| BVGA_BORBR  | Mesophiles | 209 | 0.0000 |
| CADC_LACLA  | Mesophiles | 119 | 0.0000 |
| CADC_LISMO  | Mesophiles | 119 | 0.0000 |
| CADC_STAAU  | Mesophiles | 122 | 0.0000 |
| CADF_STAAU  | Mesophiles | 121 | 0.0083 |
| CAF1R_YERPE | Mesophiles | 301 | 0.0000 |
| CARQ_MYXXA  | Mesophiles | 174 | 0.1724 |
| CBBR_RHORU  | Mesophiles | 298 | 0.0034 |
| CBBR_RHOSH  | Mesophiles | 310 | 0.0258 |
| CBBR_SINMW  | Mesophiles | 313 | 0.0064 |
| CBIO2_MYCS5 | Mesophiles | 311 | 0.0193 |
| CBL_ECOLI   | Mesophiles | 316 | 0.0000 |
| CCPA_BACSU  | Mesophiles | 334 | 0.0299 |
| CCPA_STAAC  | Mesophiles | 329 | 0.0304 |
| CCPA_STAAR  | Mesophiles | 329 | 0.0213 |
| CCPA_STAEQ  | Mesophiles | 329 | 0.0669 |
| CCPA_STRMU  | Mesophiles | 333 | 0.0330 |
| CCPB_BACSU  | Mesophiles | 311 | 0.0000 |

|            |            |     |        |
|------------|------------|-----|--------|
| CCPN_BACSU | Mesophiles | 212 | 0.0000 |
| CFAD_ECOLX | Mesophiles | 265 | 0.0000 |
| CFXR_RALEH | Mesophiles | 317 | 0.0063 |
| CHBR_ECOLI | Mesophiles | 280 | 0.0000 |
| CITR_BACSU | Mesophiles | 291 | 0.0000 |
| CLP_XANCP  | Mesophiles | 230 | 0.0957 |
| CMPA_BACSU | Mesophiles | 214 | 0.0421 |
| CMTR_MYCBO | Mesophiles | 118 | 0.0085 |
| CNRH_RALME | Mesophiles | 191 | 0.0524 |
| CRP_ECO57  | Mesophiles | 210 | 0.0238 |
| CRP_HAEIN  | Mesophiles | 224 | 0.0714 |
| CRP_PASMU  | Mesophiles | 209 | 0.0191 |
| CRP_SALTY  | Mesophiles | 210 | 0.0238 |
| CSCR_ECOLX | Mesophiles | 331 | 0.0060 |
| CSGD_ECOLI | Mesophiles | 216 | 0.0000 |
| CSGD_SALTY | Mesophiles | 216 | 0.0000 |
| CSVN_ECOLX | Mesophiles | 301 | 0.0033 |
| CUER_BACSU | Mesophiles | 143 | 0.0070 |
| CUER_ECO57 | Mesophiles | 135 | 0.1185 |
| CUER_ECOL6 | Mesophiles | 135 | 0.1333 |
| CUER_ECOLI | Mesophiles | 135 | 0.1185 |
| CUER_SALTY | Mesophiles | 138 | 0.0580 |
| CUER_VIBC3 | Mesophiles | 139 | 0.0432 |
| CUER_YERPE | Mesophiles | 139 | 0.0000 |
| CYNR_ECO57 | Mesophiles | 299 | 0.0100 |
| CYNR_ECOLI | Mesophiles | 299 | 0.0000 |
| CYSB_ECO57 | Mesophiles | 324 | 0.0000 |
| CYSB_HAEIN | Mesophiles | 323 | 0.0000 |
| CYSB_KLEPN | Mesophiles | 324 | 0.0031 |
| CYSB_SALTY | Mesophiles | 324 | 0.0000 |
| CYSL_BACSU | Mesophiles | 299 | 0.0134 |
| CYTR_ECO57 | Mesophiles | 341 | 0.0674 |
| CZCR_BACC1 | Mesophiles | 288 | 0.0000 |
| CZCR_BACCR | Mesophiles | 288 | 0.0000 |
| CZCR_BACSU | Mesophiles | 288 | 0.0000 |
| DASR_STRAW | Mesophiles | 254 | 0.1850 |
| DASR_STRCO | Mesophiles | 254 | 0.2047 |
| DCTD_RHILE | Mesophiles | 448 | 0.1004 |
| DCTR_BACSU | Mesophiles | 226 | 0.0044 |
| DCTR_ECO57 | Mesophiles | 176 | 0.0000 |
| DCTR_ECOL6 | Mesophiles | 176 | 0.0000 |
| DCTR_ECOLI | Mesophiles | 176 | 0.0000 |
| DCTR_SHIFL | Mesophiles | 176 | 0.0000 |
| DEGA_BACSU | Mesophiles | 337 | 0.1157 |
| DEGU_BACSU | Mesophiles | 229 | 0.0218 |
| DEOR_ECO57 | Mesophiles | 252 | 0.0040 |
| DESR_BACSU | Mesophiles | 199 | 0.0050 |
| DGOR_ECOLI | Mesophiles | 229 | 0.0742 |
| DHAR_ECOLI | Mesophiles | 639 | 0.0203 |
| DHAS_LACLA | Mesophiles | 187 | 0.0000 |

|            |              |     |        |
|------------|--------------|-----|--------|
| DSDC_ECOLI | Mesophiles   | 311 | 0.0000 |
| DTXR_CORDI | Mesophiles   | 226 | 0.1283 |
| DTXR_COREF | Mesophiles   | 230 | 0.1348 |
| DTXR_CORGL | Mesophiles   | 228 | 0.1491 |
| EBGR_ECOLI | Mesophiles   | 327 | 0.0061 |
| ENVR_ECO57 | Mesophiles   | 220 | 0.0091 |
| ENVY_ECOLI | Mesophiles   | 253 | 0.0040 |
| EUTR_ECOLI | Mesophiles   | 350 | 0.0171 |
| EUTR_SALTY | Mesophiles   | 350 | 0.0171 |
| EVGA_ECO57 | Mesophiles   | 204 | 0.0000 |
| EXSA_PSEAE | Mesophiles   | 278 | 0.0468 |
| EXUR_BACSU | Mesophiles   | 153 | 0.0065 |
| EXUR_ECO57 | Mesophiles   | 258 | 0.0465 |
| FABR_ECO24 | Mesophiles   | 215 | 0.0419 |
| FABR_ECOHS | Mesophiles   | 215 | 0.0419 |
| FABR_ECOK1 | Mesophiles   | 215 | 0.0558 |
| FABR_ENTS8 | Mesophiles   | 211 | 0.0474 |
| FABR_KLEP7 | Mesophiles   | 210 | 0.0429 |
| FABR_SALTY | Mesophiles   | 210 | 0.0381 |
| FABR_SHIB3 | Mesophiles   | 215 | 0.0372 |
| FABR_YERE8 | Mesophiles   | 210 | 0.0190 |
| FABR_YERPA | Mesophiles   | 211 | 0.0190 |
| FADR_BACSU | Mesophiles   | 194 | 0.0000 |
| FADR_ECO24 | Mesophiles   | 239 | 0.0084 |
| FADR_ENTS8 | Mesophiles   | 239 | 0.0042 |
| FADR_HAEI8 | Mesophiles   | 241 | 0.0166 |
| FADR_HAEIE | Mesophiles   | 241 | 0.0166 |
| FADR_HAEIG | Mesophiles   | 241 | 0.0166 |
| FADR_KLEP3 | Mesophiles   | 239 | 0.0000 |
| FADR_KLEP7 | Mesophiles   | 239 | 0.0000 |
| FADR_PASMU | Mesophiles   | 241 | 0.0373 |
| FADR_SALTY | Mesophiles   | 239 | 0.0084 |
| FADR_SHEAM | Mesophiles   | 240 | 0.0208 |
| FADR_SHEDO | Mesophiles   | 239 | 0.0042 |
| FADR_SHEFN | Mesophiles   | 239 | 0.0209 |
| FADR_VIBC3 | Mesophiles   | 279 | 0.0143 |
| FADR_VIBPA | Mesophiles   | 279 | 0.0215 |
| FADR_VIBVU | Mesophiles   | 279 | 0.0287 |
| FADR_YERE8 | Mesophiles   | 239 | 0.0126 |
| FADR_YERPA | Mesophiles   | 239 | 0.0084 |
| FAPR_BACC1 | Mesophiles   | 197 | 0.0558 |
| FAPR_BACCN | Mesophiles   | 197 | 0.0508 |
| FAPR_BACCR | Mesophiles   | 197 | 0.0558 |
| FAPR_BACSU | Mesophiles   | 188 | 0.0106 |
| FAPR_ECOLX | Mesophiles   | 260 | 0.0000 |
| FAPR_GEOKA | Thermophiles | 198 | 0.0556 |
| FAPR_GEOTN | Thermophiles | 198 | 0.0707 |
| FAPR_LISIN | Mesophiles   | 189 | 0.0053 |
| FAPR_LISMF | Mesophiles   | 189 | 0.0053 |
| FAPR_OCEIH | Mesophiles   | 191 | 0.0052 |

|            |                   |     |        |
|------------|-------------------|-----|--------|
| FAPR_STAA1 | Mesophiles        | 185 | 0.0108 |
| FAPR_STAEQ | Mesophiles        | 186 | 0.0000 |
| FAPR_STAHJ | Mesophiles        | 186 | 0.0000 |
| FAPR_THETN | Hyperthermophiles | 200 | 0.0000 |
| FEAR_ECOLI | Mesophiles        | 301 | 0.0100 |
| FECI_ECOLI | Mesophiles        | 173 | 0.0520 |
| FHLA_ECOLI | Mesophiles        | 692 | 0.0101 |
| FHLA_SALTY | Mesophiles        | 692 | 0.0434 |
| FIMW_SALTY | Mesophiles        | 198 | 0.0000 |
| FIMZ_ECO57 | Mesophiles        | 210 | 0.0000 |
| FIMZ_SALTY | Mesophiles        | 210 | 0.0286 |
| FISL_NEIMA | Mesophiles        | 79  | 0.0000 |
| FISL_PSEAE | Mesophiles        | 104 | 0.4808 |
| FISL_XANAC | Mesophiles        | 90  | 0.2556 |
| FISL_XANCP | Mesophiles        | 90  | 0.2556 |
| FISL_XYLFA | Mesophiles        | 90  | 0.2000 |
| FISL_XYLFT | Mesophiles        | 90  | 0.2000 |
| FIS_ACTSZ  | Mesophiles        | 99  | 0.0404 |
| FIS_AERHH  | Mesophiles        | 98  | 0.2041 |
| FIS_ECO24  | Mesophiles        | 98  | 0.1020 |
| FIS_HAEDU  | Mesophiles        | 98  | 0.3469 |
| FIS_HAEI8  | Mesophiles        | 99  | 0.1111 |
| FIS_HAEIE  | Mesophiles        | 99  | 0.0505 |
| FIS_HAES1  | Mesophiles        | 98  | 0.1429 |
| FIS_KLEPN  | Mesophiles        | 93  | 0.1075 |
| FIS_MANSM  | Mesophiles        | 99  | 0.2424 |
| FIS_PASMU  | Mesophiles        | 99  | 0.2828 |
| FIS_PHOPR  | Psychrophiles     | 98  | 0.0918 |
| FIS_PSYIN  | Psychrophiles     | 99  | 0.1818 |
| FIS_SHEAM  | Mesophiles        | 101 | 0.2079 |
| FIS_SHEDO  | Mesophiles        | 101 | 0.1089 |
| FIS_SHEFN  | Mesophiles        | 101 | 0.0891 |
| FIS_SHESH  | Psychrophiles     | 101 | 0.2475 |
| FIS_VIBC3  | Mesophiles        | 98  | 0.0714 |
| FIS_YERE8  | Mesophiles        | 98  | 0.0510 |
| FIXJ_BRAJA | Mesophiles        | 205 | 0.0000 |
| FIXK_BRAJA | Mesophiles        | 237 | 0.0000 |
| FLBD_CAUCR | Mesophiles        | 455 | 0.0703 |
| FLHD_BORBR | Mesophiles        | 107 | 0.0000 |
| FLHD_BORPE | Mesophiles        | 107 | 0.0000 |
| FLHD_ECO24 | Mesophiles        | 116 | 0.0603 |
| FLHD_ECO45 | Mesophiles        | 119 | 0.0588 |
| FLHD_ECO57 | Mesophiles        | 116 | 0.0517 |
| FLHD_ENTS8 | Mesophiles        | 119 | 0.0504 |
| FLHD_RALEH | Mesophiles        | 105 | 0.0000 |
| FLHD_RALEJ | Mesophiles        | 105 | 0.0000 |
| FLHD_SALTY | Mesophiles        | 113 | 0.0177 |
| FLHD_SHIBS | Mesophiles        | 119 | 0.0588 |
| FLHD_YEREN | Mesophiles        | 119 | 0.0168 |
| FLIA_ECO57 | Mesophiles        | 239 | 0.0544 |

|            |                   |     |        |
|------------|-------------------|-----|--------|
| FLIA_PSEAE | Mesophiles        | 247 | 0.0567 |
| FLIA_SALTY | Mesophiles        | 239 | 0.1213 |
| FLIA_YEREN | Mesophiles        | 230 | 0.1435 |
| FLJA_SALTY | Mesophiles        | 179 | 0.0000 |
| FLP_LACCA  | Mesophiles        | 219 | 0.0000 |
| FNRL_RHOS4 | Mesophiles        | 248 | 0.0161 |
| FNRN_RHILV | Mesophiles        | 240 | 0.0042 |
| FNR_BACSU  | Mesophiles        | 238 | 0.0000 |
| FNR_ECO57  | Mesophiles        | 250 | 0.0080 |
| FNR_HAEIN  | Mesophiles        | 257 | 0.0039 |
| FNR_PASMU  | Mesophiles        | 273 | 0.0000 |
| FNR_SALTY  | Mesophiles        | 250 | 0.0080 |
| FNR_SHIDY  | Mesophiles        | 250 | 0.0080 |
| FNR_VIBC3  | Mesophiles        | 250 | 0.0080 |
| FNR_YERPE  | Mesophiles        | 250 | 0.0120 |
| FRLR_ECO57 | Mesophiles        | 243 | 0.0000 |
| FRLR_ECOLI | Mesophiles        | 243 | 0.0000 |
| FRLR_SHIFL | Mesophiles        | 243 | 0.0000 |
| FRUR_BACSU | Mesophiles        | 251 | 0.0000 |
| FRUR_ECO57 | Mesophiles        | 334 | 0.0000 |
| FRUR_SALTY | Mesophiles        | 334 | 0.0000 |
| FUCR_ECOLI | Mesophiles        | 243 | 0.0329 |
| FUCR_HAEIN | Mesophiles        | 249 | 0.0000 |
| FURH_ARCFU | Hyperthermophiles | 128 | 0.0000 |
| FUR_BACSU  | Mesophiles        | 149 | 0.0000 |
| FUR_BORBR  | Mesophiles        | 139 | 0.0000 |
| FUR_BRUA2  | Mesophiles        | 141 | 0.1844 |
| FUR_BRUME  | Mesophiles        | 141 | 0.1844 |
| FUR_BRUSU  | Mesophiles        | 141 | 0.1773 |
| FUR_ECO57  | Mesophiles        | 148 | 0.0676 |
| FUR_HAEDU  | Mesophiles        | 149 | 0.0201 |
| FUR_HAEIN  | Mesophiles        | 146 | 0.0000 |
| FUR_HELPJ  | Mesophiles        | 150 | 0.0400 |
| FUR_HELPY  | Mesophiles        | 150 | 0.0400 |
| FUR_KLEPN  | Mesophiles        | 155 | 0.0968 |
| FUR_MYCBO  | Mesophiles        | 147 | 0.0136 |
| FUR_NEIGO  | Mesophiles        | 144 | 0.0000 |
| FUR_NEIMA  | Mesophiles        | 144 | 0.0000 |
| FUR_NEIMC  | Mesophiles        | 144 | 0.0000 |
| FUR_PSEAE  | Mesophiles        | 134 | 0.0000 |
| FUR_PSEFL  | Mesophiles        | 123 | 0.0325 |
| FUR_RALME  | Mesophiles        | 143 | 0.0280 |
| FUR_RHILV  | Mesophiles        | 142 | 0.0845 |
| FUR_SHIFL  | Mesophiles        | 148 | 0.0676 |
| FUR_STAA8  | Mesophiles        | 136 | 0.0000 |
| FUR_STAEP  | Mesophiles        | 138 | 0.0000 |
| FUR_STAEQ  | Mesophiles        | 139 | 0.0000 |
| FUR_VIBC3  | Mesophiles        | 150 | 0.0867 |
| FUR_VIBCH  | Mesophiles        | 150 | 0.0867 |
| FUR_VIBPA  | Mesophiles        | 149 | 0.0671 |



|            |              |     |        |
|------------|--------------|-----|--------|
| FUR_VIBVU  | Mesophiles   | 149 | 0.0671 |
| FUR_YERPE  | Mesophiles   | 148 | 0.0676 |
| GABR_BACSU | Mesophiles   | 479 | 0.0063 |
| GACA_PSEAE | Mesophiles   | 214 | 0.0000 |
| GACA_PSEFL | Mesophiles   | 213 | 0.0000 |
| GADE_ECO57 | Mesophiles   | 175 | 0.0000 |
| GADW_ECO57 | Mesophiles   | 242 | 0.0000 |
| GADW_ECOL6 | Mesophiles   | 242 | 0.0000 |
| GADX_ECO27 | Mesophiles   | 274 | 0.0000 |
| GADX_ECO57 | Mesophiles   | 274 | 0.0109 |
| GADX_ECOL6 | Mesophiles   | 274 | 0.0000 |
| GADX_ECOLI | Mesophiles   | 274 | 0.0073 |
| GADX_SHIFL | Mesophiles   | 274 | 0.0146 |
| GALR_ECOLI | Mesophiles   | 343 | 0.0758 |
| GALR_HAEIN | Mesophiles   | 332 | 0.0000 |
| GALR_LACCA | Mesophiles   | 331 | 0.0151 |
| GALR_SALTY | Mesophiles   | 342 | 0.0965 |
| GALR_STRTR | Thermophiles | 331 | 0.0030 |
| GALS_ECOLI | Mesophiles   | 346 | 0.0260 |
| GALS_SALTY | Mesophiles   | 340 | 0.0059 |
| GATR_ECOLI | Mesophiles   | 259 | 0.0425 |
| GCVA_ECO57 | Mesophiles   | 305 | 0.0000 |
| GCVA_HAEIN | Mesophiles   | 301 | 0.0000 |
| GERE_BACSU | Mesophiles   | 74  | 0.1486 |
| GLCC_ECOL6 | Mesophiles   | 254 | 0.0039 |
| GLCR_BACSU | Mesophiles   | 258 | 0.0039 |
| GLK_BURTA  | Mesophiles   | 641 | 0.0328 |
| GLK_BURXL  | Mesophiles   | 638 | 0.0392 |
| GLNR_BACCE | Mesophiles   | 129 | 0.0698 |
| GLNR_BACSU | Mesophiles   | 135 | 0.2074 |
| GLPR_ECOLI | Mesophiles   | 252 | 0.1389 |
| GLPR_HAEIN | Mesophiles   | 255 | 0.0235 |
| GLPR_PSEAE | Mesophiles   | 251 | 0.0438 |
| GLTC_BACSU | Mesophiles   | 300 | 0.0000 |
| GLTR_BACSU | Mesophiles   | 296 | 0.0473 |
| GLVR_BACSU | Mesophiles   | 254 | 0.0079 |
| GMUR_BACSU | Mesophiles   | 237 | 0.0042 |
| GNTR_BACSU | Mesophiles   | 243 | 0.0000 |
| GNTR_ECOL6 | Mesophiles   | 331 | 0.0000 |
| GRP_ZYMMO  | Mesophiles   | 164 | 0.0183 |
| HCAR_ECOLI | Mesophiles   | 296 | 0.0000 |
| HDFR_ECO24 | Mesophiles   | 279 | 0.0000 |
| HDFR_ECO45 | Mesophiles   | 279 | 0.0000 |
| HDFR_ECO7I | Mesophiles   | 279 | 0.0000 |
| HDFR_ECODH | Mesophiles   | 279 | 0.0000 |
| HDFR_ECOLU | Mesophiles   | 279 | 0.0000 |
| HDFR_SALTY | Mesophiles   | 278 | 0.0000 |
| HDFR_SHIB3 | Mesophiles   | 279 | 0.0000 |
| HDFR_YERE8 | Mesophiles   | 293 | 0.0751 |
| HDFR_YERPA | Mesophiles   | 293 | 0.0819 |

|            |               |     |        |
|------------|---------------|-----|--------|
| HEXR_ECOLI | Mesophiles    | 289 | 0.0173 |
| HEXR_PSEAE | Mesophiles    | 285 | 0.0105 |
| HILD_SALTY | Mesophiles    | 309 | 0.0194 |
| HLYU_VIBCH | Mesophiles    | 108 | 0.0000 |
| HMMR_RHILV | Mesophiles    | 129 | 0.0620 |
| HMRR_SINMW | Mesophiles    | 147 | 0.0680 |
| HOSA_ECO11 | Mesophiles    | 135 | 0.0519 |
| HOSA_ECO27 | Mesophiles    | 135 | 0.0074 |
| HOSA_ECO57 | Mesophiles    | 135 | 0.0074 |
| HOXA_BRAJA | Mesophiles    | 485 | 0.0454 |
| HOXA_RALEH | Mesophiles    | 482 | 0.0249 |
| HPCR_ECOLX | Mesophiles    | 148 | 0.0541 |
| HPR_BACC1  | Mesophiles    | 185 | 0.0000 |
| HPR_BACCN  | Mesophiles    | 185 | 0.0000 |
| HPR_BACCR  | Mesophiles    | 185 | 0.0000 |
| HPR_BACSU  | Mesophiles    | 203 | 0.0936 |
| HPR_GEOKA  | Thermophiles  | 201 | 0.0945 |
| HPR_GEOTN  | Thermophiles  | 200 | 0.0900 |
| HRCA_KINRD | Mesophiles    | 346 | 0.0347 |
| HRCA_LACC3 | Mesophiles    | 348 | 0.0144 |
| HRCA_LACCB | Mesophiles    | 348 | 0.0144 |
| HRCA_MYCPE | Mesophiles    | 338 | 0.0000 |
| HRCA_PEDPA | Mesophiles    | 346 | 0.0347 |
| HRCA_ROSCS | Thermophiles  | 359 | 0.0334 |
| HRCA_STRGC | Mesophiles    | 344 | 0.0029 |
| HRCA_STRP2 | Mesophiles    | 344 | 0.0087 |
| HRCA_STRP4 | Mesophiles    | 344 | 0.0087 |
| HRCA_STRPI | Mesophiles    | 344 | 0.0087 |
| HRDA_STRCO | Mesophiles    | 396 | 0.2601 |
| HRDB_STRCO | Mesophiles    | 511 | 0.4481 |
| HRDC_STRCO | Mesophiles    | 339 | 0.3097 |
| HRDD_STRCO | Mesophiles    | 332 | 0.1988 |
| HSPR_STRCO | Mesophiles    | 151 | 0.1258 |
| HUTC_PSEAE | Mesophiles    | 250 | 0.0840 |
| HYFR_ECOLI | Mesophiles    | 670 | 0.0463 |
| ICAR_STAA8 | Mesophiles    | 186 | 0.0000 |
| ICAR_STAEP | Mesophiles    | 185 | 0.0000 |
| ICAR_STAEQ | Mesophiles    | 185 | 0.0000 |
| ICIA_ECO24 | Mesophiles    | 297 | 0.0202 |
| ICIA_ECO71 | Mesophiles    | 297 | 0.0202 |
| ICIA_ENTS8 | Mesophiles    | 297 | 0.0404 |
| ICIA_KLEP3 | Mesophiles    | 297 | 0.0236 |
| ICIA_KLEP7 | Mesophiles    | 297 | 0.0236 |
| ICIA_PHOPR | Psychrophiles | 298 | 0.0034 |
| ICIA_PSEAB | Mesophiles    | 300 | 0.0100 |
| ICIA_PSEF5 | Mesophiles    | 299 | 0.0000 |
| ICIA_PSEPF | Mesophiles    | 297 | 0.0067 |
| ICIA_SALTY | Mesophiles    | 297 | 0.0269 |
| ICIA_VIBC3 | Mesophiles    | 298 | 0.0000 |
| ICIA_VIBCH | Mesophiles    | 298 | 0.0000 |

|             |                   |     |        |
|-------------|-------------------|-----|--------|
| ICIA_VIBPA  | Mesophiles        | 298 | 0.0034 |
| ICIA_VIBVU  | Mesophiles        | 298 | 0.0000 |
| ICIA_VIBVY  | Mesophiles        | 298 | 0.0000 |
| ICIA_YERE8  | Mesophiles        | 297 | 0.0236 |
| ICIA_YERPA  | Mesophiles        | 302 | 0.0066 |
| IDER_MYCBO  | Mesophiles        | 230 | 0.2696 |
| IDER_MYCLE  | Mesophiles        | 230 | 0.1565 |
| IDNR_ECOLI  | Mesophiles        | 332 | 0.0000 |
| IF2B_AERPE  | Hyperthermophiles | 148 | 0.0068 |
| IF2B_METS3  | Mesophiles        | 135 | 0.0000 |
| IF2B_METTP  | Thermophiles      | 208 | 0.0000 |
| IF2B_SULSO  | Hyperthermophiles | 139 | 0.0000 |
| ILVR_CAUCR  | Mesophiles        | 296 | 0.0034 |
| ILVY_ECOLI  | Mesophiles        | 297 | 0.0236 |
| ILVY_HAEIN  | Mesophiles        | 292 | 0.0479 |
| ILVY_SALTY  | Mesophiles        | 295 | 0.0237 |
| INVF_SALTY  | Mesophiles        | 216 | 0.0000 |
| IOLR_BACSU  | Mesophiles        | 251 | 0.0000 |
| IRGB_VIBC3  | Mesophiles        | 298 | 0.0067 |
| IRGB_VIBCH  | Mesophiles        | 298 | 0.0067 |
| ISCR_ECO24  | Mesophiles        | 162 | 0.1358 |
| ISCR_ECO8A  | Mesophiles        | 162 | 0.0926 |
| ISCR_ENTS8  | Mesophiles        | 162 | 0.1235 |
| ISCR_KLEP3  | Mesophiles        | 163 | 0.1227 |
| ISCR_KLEP7  | Mesophiles        | 163 | 0.1227 |
| ISCR_PHOPR  | Psychrophiles     | 172 | 0.1163 |
| ISCR_SALTY  | Mesophiles        | 164 | 0.1159 |
| ISCR_VIBCH  | Mesophiles        | 173 | 0.0000 |
| ISCR_VIBHB  | Mesophiles        | 168 | 0.0119 |
| ISCR_VIBPA  | Mesophiles        | 168 | 0.0119 |
| ISCR_VIBVU  | Mesophiles        | 168 | 0.0000 |
| ISCR_YERE8  | Mesophiles        | 164 | 0.1646 |
| ISCR_YERPA  | Mesophiles        | 164 | 0.1646 |
| KDGR_BACSU  | Mesophiles        | 339 | 0.0501 |
| LACI_ECOLI  | Mesophiles        | 360 | 0.0306 |
| LACI_KLEPN  | Mesophiles        | 354 | 0.0424 |
| LACR_LACLA  | Mesophiles        | 255 | 0.0039 |
| LACR_STAA8  | Mesophiles        | 251 | 0.0159 |
| LACR_STAAM  | Mesophiles        | 251 | 0.0159 |
| LACR_STAAR  | Mesophiles        | 251 | 0.0159 |
| LACR_STAEQ  | Mesophiles        | 251 | 0.0080 |
| LACR_STRMU  | Mesophiles        | 251 | 0.0478 |
| LAFS_VIBPA  | Mesophiles        | 242 | 0.2479 |
| LASR_PSEAE  | Mesophiles        | 239 | 0.0000 |
| LCRF_YERPE  | Mesophiles        | 271 | 0.0000 |
| LEU11_SULSO | Hyperthermophiles | 461 | 0.0000 |
| LEU12_SULTO | Hyperthermophiles | 460 | 0.0000 |
| LEUO_ECOLI  | Mesophiles        | 314 | 0.0478 |
| LEUO_SALTY  | Mesophiles        | 314 | 0.0382 |
| LIAR_BACSU  | Mesophiles        | 211 | 0.0047 |

|            |                   |     |        |
|------------|-------------------|-----|--------|
| LLDR_ECOLI | Mesophiles        | 258 | 0.0930 |
| LMRA_BACSU | Mesophiles        | 188 | 0.0000 |
| LRHA_ECO57 | Mesophiles        | 312 | 0.0128 |
| LRHA_ECOLI | Mesophiles        | 312 | 0.0256 |
| LRPA_BACSU | Mesophiles        | 136 | 0.0000 |
| LRPB_BACSU | Mesophiles        | 149 | 0.0000 |
| LRPC_BACSU | Mesophiles        | 144 | 0.0000 |
| LRP_ECO57  | Mesophiles        | 164 | 0.0366 |
| LRP_HAEIN  | Mesophiles        | 166 | 0.0241 |
| LRP_KLEPN  | Mesophiles        | 164 | 0.0366 |
| LRP_SALTY  | Mesophiles        | 164 | 0.0305 |
| LTRA_KLEPN | Mesophiles        | 309 | 0.0485 |
| LUXO_VIBC3 | Mesophiles        | 530 | 0.0434 |
| LUXO_VIBCH | Mesophiles        | 455 | 0.0308 |
| LUXO_VIBHA | Mesophiles        | 453 | 0.0486 |
| LUXO_VIBPA | Mesophiles        | 453 | 0.0574 |
| LUXO_VIBVU | Mesophiles        | 453 | 0.0309 |
| LUXR_VIBHA | Mesophiles        | 205 | 0.0098 |
| LYSG_COREF | Mesophiles        | 290 | 0.0000 |
| LYSG_CORGL | Mesophiles        | 290 | 0.0103 |
| LYSM_SULSO | Hyperthermophiles | 142 | 0.0000 |
| LYSM_SULTO | Hyperthermophiles | 140 | 0.0000 |
| LYSR_ECOLI | Mesophiles        | 311 | 0.0129 |
| MALI_ECOLI | Mesophiles        | 342 | 0.0029 |
| MALR_STRCO | Mesophiles        | 344 | 0.0959 |
| MALR_STRPN | Mesophiles        | 328 | 0.0366 |
| MALT_ECO24 | Mesophiles        | 421 | 0.0024 |
| MALT_ECO45 | Mesophiles        | 421 | 0.0024 |
| MALT_ECODH | Mesophiles        | 421 | 0.0024 |
| MALT_ECOL6 | Mesophiles        | 421 | 0.0024 |
| MALT_ECOLC | Mesophiles        | 421 | 0.0024 |
| MALT_ENTS8 | Mesophiles        | 421 | 0.0024 |
| MALT_KLEP3 | Mesophiles        | 421 | 0.0071 |
| MALT_KLEP7 | Mesophiles        | 421 | 0.0071 |
| MALT_SALTY | Mesophiles        | 421 | 0.0048 |
| MALT_SHIF8 | Mesophiles        | 421 | 0.0024 |
| MALT_SHISS | Mesophiles        | 421 | 0.0024 |
| MALT_VIBCH | Mesophiles        | 422 | 0.0024 |
| MALT_VIBHB | Mesophiles        | 422 | 0.0166 |
| MALT_VIBPA | Mesophiles        | 422 | 0.0095 |
| MALT_VIBVU | Mesophiles        | 422 | 0.0024 |
| MALT_VIBVY | Mesophiles        | 422 | 0.0024 |
| MALT_YERE8 | Mesophiles        | 423 | 0.0024 |
| MALT_YERPA | Mesophiles        | 423 | 0.0024 |
| MARA_ECO57 | Mesophiles        | 127 | 0.0315 |
| MARA_SALTY | Mesophiles        | 127 | 0.0079 |
| MARR_ECOLI | Mesophiles        | 144 | 0.0000 |
| MARR_SALTY | Mesophiles        | 144 | 0.0000 |
| MATA_ECO24 | Mesophiles        | 196 | 0.0000 |
| MATA_ECO55 | Mesophiles        | 196 | 0.0000 |

|            |            |      |        |
|------------|------------|------|--------|
| MATA_ECO57 | Mesophiles | 196  | 0.0000 |
| MATA_ECO81 | Mesophiles | 196  | 0.0000 |
| MATA_ECODH | Mesophiles | 196  | 0.0000 |
| MATA_ECOK1 | Mesophiles | 196  | 0.0000 |
| MATA_ECOLU | Mesophiles | 196  | 0.0000 |
| MATA_KLEP3 | Mesophiles | 180  | 0.0000 |
| MATA_KLEP7 | Mesophiles | 180  | 0.0000 |
| MAUR_KLEPN | Mesophiles | 308  | 0.0000 |
| MAUR_PARDE | Mesophiles | 283  | 0.0000 |
| MCBR_ECOLI | Mesophiles | 221  | 0.0045 |
| MELR_ECOL6 | Mesophiles | 302  | 0.0298 |
| MERD_PSEAE | Mesophiles | 121  | 0.0661 |
| MERD_PSEFL | Mesophiles | 55   | 0.0000 |
| MERD_SHIFL | Mesophiles | 120  | 0.0333 |
| MERR_BACCE | Mesophiles | 132  | 0.0076 |
| MERR_PSEAE | Mesophiles | 144  | 0.0139 |
| MERR_SHIFL | Mesophiles | 144  | 0.0069 |
| MERR_STAAU | Mesophiles | 135  | 0.0074 |
| METJ_ACTSZ | Mesophiles | 105  | 0.1238 |
| METJ_ECO24 | Mesophiles | 105  | 0.2571 |
| METJ_ENTS8 | Mesophiles | 105  | 0.2667 |
| METJ_HAEDU | Mesophiles | 105  | 0.1429 |
| METJ_HAEI8 | Mesophiles | 105  | 0.1524 |
| METJ_HAEIE | Mesophiles | 105  | 0.1524 |
| METJ_HAES1 | Mesophiles | 105  | 0.1524 |
| METJ_KLEP3 | Mesophiles | 105  | 0.2381 |
| METJ_KLEP7 | Mesophiles | 105  | 0.2095 |
| METJ_PASMU | Mesophiles | 105  | 0.1905 |
| METJ_SALTY | Mesophiles | 105  | 0.2190 |
| METJ_VIBC3 | Mesophiles | 105  | 0.2476 |
| METJ_VIBHB | Mesophiles | 106  | 0.2547 |
| METJ_VIBVU | Mesophiles | 105  | 0.2857 |
| METJ_YERE8 | Mesophiles | 105  | 0.2190 |
| METJ_YERPA | Mesophiles | 105  | 0.1905 |
| METR_ECO57 | Mesophiles | 317  | 0.0505 |
| METR_HAEIN | Mesophiles | 309  | 0.0000 |
| METR_SALTY | Mesophiles | 317  | 0.0442 |
| MEXR_PSEAE | Mesophiles | 147  | 0.0408 |
| MFD_BACSU  | Mesophiles | 1177 | 0.0229 |
| MFD_ECOLI  | Mesophiles | 1148 | 0.0200 |
| MFD_HAEIN  | Mesophiles | 1146 | 0.0297 |
| MFD_HELPJ  | Mesophiles | 1001 | 0.0130 |
| MFD_HELPY  | Mesophiles | 999  | 0.0110 |
| MFD_MYCBO  | Mesophiles | 1234 | 0.0916 |
| MFD_MYXXA  | Mesophiles | 61   | 0.0000 |
| MFD_STAA3  | Mesophiles | 1168 | 0.0265 |
| MFD_STAAB  | Mesophiles | 1168 | 0.0265 |
| MFD_STAAC  | Mesophiles | 1168 | 0.0265 |
| MFD_STAAM  | Mesophiles | 1168 | 0.0265 |
| MFD_STAAR  | Mesophiles | 1168 | 0.0240 |

|             |              |      |        |
|-------------|--------------|------|--------|
| MFD_STAAS   | Mesophiles   | 1168 | 0.0265 |
| MFD_STAEQ   | Mesophiles   | 1169 | 0.0359 |
| MFD_STAES   | Mesophiles   | 1169 | 0.0359 |
| MFD_STAHJ   | Mesophiles   | 1169 | 0.0376 |
| MGRA_STAA8  | Mesophiles   | 147  | 0.0136 |
| MHQR_BACSU  | Mesophiles   | 145  | 0.0000 |
| MLER_LACLA  | Mesophiles   | 291  | 0.0000 |
| MLRA_ECOLI  | Mesophiles   | 243  | 0.0000 |
| MLRA_SALTY  | Mesophiles   | 243  | 0.0000 |
| MMSR_PSEAE  | Mesophiles   | 307  | 0.0228 |
| MNGR_ECOLI  | Mesophiles   | 240  | 0.0292 |
| MNTR_BACC0  | Mesophiles   | 142  | 0.0704 |
| MNTR_BACC2  | Mesophiles   | 142  | 0.0563 |
| MNTR_BACC4  | Mesophiles   | 142  | 0.0563 |
| MNTR_BACCN  | Mesophiles   | 142  | 0.0211 |
| MNTR_BACCR  | Mesophiles   | 142  | 0.0704 |
| MNTR_BACSU  | Mesophiles   | 142  | 0.0915 |
| MNTR_ECO57  | Mesophiles   | 155  | 0.1419 |
| MNTR_ECOL6  | Mesophiles   | 155  | 0.1097 |
| MNTR_GEOKA  | Thermophiles | 141  | 0.0567 |
| MNTR_GEOTN  | Thermophiles | 141  | 0.0496 |
| MNTR_LISIN  | Mesophiles   | 142  | 0.0986 |
| MNTR_LISMF  | Mesophiles   | 142  | 0.0915 |
| MNTR_OCEIH  | Mesophiles   | 147  | 0.0476 |
| MNTR_SALTY  | Mesophiles   | 157  | 0.1210 |
| MODE_ECO57  | Mesophiles   | 262  | 0.0000 |
| MODE_HAEIN  | Mesophiles   | 255  | 0.0510 |
| MODE_YERPE  | Mesophiles   | 263  | 0.0114 |
| MOXX_PARDE  | Mesophiles   | 223  | 0.0000 |
| MPRA_ECO57  | Mesophiles   | 176  | 0.0682 |
| MPRR1_STRCO | Mesophiles   | 316  | 0.0791 |
| MPRR2_STRCO | Mesophiles   | 328  | 0.0518 |
| MSMR_BACSU  | Mesophiles   | 344  | 0.0291 |
| MSMR_STRMU  | Mesophiles   | 278  | 0.0144 |
| MTA_BACSU   | Mesophiles   | 257  | 0.0078 |
| MTE8_ECOLX  | Mesophiles   | 417  | 0.0552 |
| MTRR_NEIGO  | Mesophiles   | 210  | 0.0095 |
| MXIE_SHIFL  | Mesophiles   | 210  | 0.0000 |
| NAC_ECOLI   | Mesophiles   | 305  | 0.0000 |
| NAGC_ECO57  | Mesophiles   | 406  | 0.0074 |
| NANR_ECO45  | Mesophiles   | 263  | 0.2167 |
| NANR_ECO57  | Mesophiles   | 263  | 0.1863 |
| NANR_ECO7I  | Mesophiles   | 263  | 0.1787 |
| NANR_ECO8A  | Mesophiles   | 263  | 0.1825 |
| NANR_ECOLU  | Mesophiles   | 263  | 0.1749 |
| NANR_SALTY  | Mesophiles   | 263  | 0.1635 |
| NANR_SHIDS  | Mesophiles   | 263  | 0.1483 |
| NANR_SHISS  | Mesophiles   | 263  | 0.1825 |
| NARL_ECO57  | Mesophiles   | 216  | 0.0417 |
| NARP_ECOLI  | Mesophiles   | 215  | 0.0000 |

|             |                   |     |        |
|-------------|-------------------|-----|--------|
| NARP_HAEIN  | Mesophiles        | 208 | 0.0048 |
| NFXB_PSEAE  | Mesophiles        | 187 | 0.0053 |
| NHAR_ECOLI  | Mesophiles        | 301 | 0.0000 |
| NHAR_VIBCH  | Mesophiles        | 296 | 0.0068 |
| NIFA_BRAJA  | Mesophiles        | 582 | 0.1289 |
| NIFA_KLEPN  | Mesophiles        | 524 | 0.0706 |
| NIFA_RHILE  | Mesophiles        | 519 | 0.0559 |
| NIFA_RHILT  | Mesophiles        | 353 | 0.0255 |
| NIKR1_METAC | Mesophiles        | 140 | 0.0000 |
| NIKR1_METMA | Mesophiles        | 146 | 0.0274 |
| NIKR2_METAC | Mesophiles        | 140 | 0.0357 |
| NIKR2_METMA | Mesophiles        | 140 | 0.0000 |
| NIKR3_METAC | Mesophiles        | 140 | 0.0000 |
| NIKR3_METMA | Mesophiles        | 140 | 0.0286 |
| NIKR_ANADE  | Mesophiles        | 139 | 0.0000 |
| NIKR_ARCFU  | Hyperthermophiles | 138 | 0.0000 |
| NIKR_BRAJA  | Mesophiles        | 148 | 0.1622 |
| NIKR_BRUA1  | Mesophiles        | 132 | 0.1515 |
| NIKR_BRUME  | Mesophiles        | 132 | 0.1515 |
| NIKR_CAMHC  | Mesophiles        | 138 | 0.0072 |
| NIKR_CHLTE  | Thermophiles      | 134 | 0.0000 |
| NIKR_DESDG  | Mesophiles        | 139 | 0.0432 |
| NIKR_DESPS  | Psychrophiles     | 136 | 0.0221 |
| NIKR_DESVH  | Mesophiles        | 139 | 0.0000 |
| NIKR_DESVM  | Mesophiles        | 139 | 0.0000 |
| NIKR_ECO24  | Mesophiles        | 133 | 0.0827 |
| NIKR_ECOL5  | Mesophiles        | 133 | 0.0526 |
| NIKR_ECOSE  | Mesophiles        | 133 | 0.0827 |
| NIKR_ECOSM  | Mesophiles        | 133 | 0.0677 |
| NIKR_GEOMG  | Mesophiles        | 139 | 0.0791 |
| NIKR_GEOSL  | Mesophiles        | 139 | 0.0288 |
| NIKR_HALMA  | Mesophiles        | 139 | 0.0216 |
| NIKR_HALS3  | Thermophiles      | 142 | 0.0141 |
| NIKR_HELAH  | Mesophiles        | 148 | 0.0203 |
| NIKR_HELHP  | Mesophiles        | 143 | 0.0350 |
| NIKR_HELP2  | Mesophiles        | 148 | 0.0068 |
| NIKR_HELPG  | Mesophiles        | 148 | 0.0473 |
| NIKR_HELPH  | Mesophiles        | 148 | 0.0203 |
| NIKR_HELPJ  | Mesophiles        | 148 | 0.0135 |
| NIKR_HELPS  | Mesophiles        | 148 | 0.0338 |
| NIKR_HELPY  | Mesophiles        | 148 | 0.0270 |
| NIKR_KLEP3  | Mesophiles        | 132 | 0.1364 |
| NIKR_KLEP7  | Mesophiles        | 132 | 0.1439 |
| NIKR_META3  | Mesophiles        | 0   | 0.0000 |
| NIKR_METBU  | Mesophiles        | 140 | 0.0000 |
| NIKR_METKA  | Hyperthermophiles | 141 | 0.0071 |
| NIKR_METTP  | Thermophiles      | 140 | 0.0000 |
| NIKR_PELPD  | Mesophiles        | 139 | 0.0000 |
| NIKR_PYRAB  | Hyperthermophiles | 138 | 0.0000 |
| NIKR_PYRFU  | Hyperthermophiles | 138 | 0.0000 |

|             |                   |     |        |
|-------------|-------------------|-----|--------|
| NIKR_PYRHO  | Hyperthermophiles | 138 | 0.0000 |
| NIKR_RHOP2  | Mesophiles        | 139 | 0.1511 |
| NIKR_RHOPA  | Mesophiles        | 148 | 0.2432 |
| NIKR_RHOPS  | Mesophiles        | 140 | 0.1929 |
| NIKR_RHOPT  | Mesophiles        | 147 | 0.2313 |
| NIKR_SALTY  | Mesophiles        | 133 | 0.0677 |
| NIKR_SOLUE  | Mesophiles        | 139 | 0.0216 |
| NIKR_SULSO  | Hyperthermophiles | 133 | 0.0000 |
| NIKR_SYNAS  | Mesophiles        | 137 | 0.0000 |
| NIKR_THETN  | Hyperthermophiles | 154 | 0.0000 |
| NOD11_BRAJA | Mesophiles        | 314 | 0.0478 |
| NOD12_BRAJA | Mesophiles        | 321 | 0.0000 |
| NOD21_BRAJA | Mesophiles        | 330 | 0.0788 |
| NOD22_BRAJA | Mesophiles        | 312 | 0.0224 |
| NODD1_RHILP | Mesophiles        | 314 | 0.0000 |
| NODD2_RHILP | Mesophiles        | 318 | 0.0000 |
| NODD3_RHILP | Mesophiles        | 302 | 0.0000 |
| NODD_RHILE  | Mesophiles        | 322 | 0.0124 |
| NODD_RHILT  | Mesophiles        | 318 | 0.0472 |
| NODD_RHILV  | Mesophiles        | 303 | 0.0000 |
| NODW_BRAJA  | Mesophiles        | 227 | 0.0485 |
| NOLA_BRAJA  | Mesophiles        | 237 | 0.1603 |
| NORG_STAA3  | Mesophiles        | 442 | 0.0090 |
| NORG_STAAB  | Mesophiles        | 442 | 0.0000 |
| NORG_STAAM  | Mesophiles        | 442 | 0.0090 |
| NORR1_RALEH | Mesophiles        | 514 | 0.0700 |
| NORR2_RALEH | Mesophiles        | 521 | 0.0653 |
| NORR_AERHH  | Mesophiles        | 508 | 0.0965 |
| NORR_ECO24  | Mesophiles        | 504 | 0.0179 |
| NORR_ECO45  | Mesophiles        | 504 | 0.0099 |
| NORR_ECO57  | Mesophiles        | 504 | 0.0079 |
| NORR_ECO7I  | Mesophiles        | 504 | 0.0278 |
| NORR_ECO8A  | Mesophiles        | 504 | 0.0099 |
| NORR_ECODH  | Mesophiles        | 504 | 0.0079 |
| NORR_ECOHS  | Mesophiles        | 504 | 0.0099 |
| NORR_ECOL5  | Mesophiles        | 504 | 0.0099 |
| NORR_ECOL6  | Mesophiles        | 504 | 0.0079 |
| NORR_ECOLC  | Mesophiles        | 504 | 0.0179 |
| NORR_ECOLU  | Mesophiles        | 504 | 0.0099 |
| NORR_ECOSE  | Mesophiles        | 504 | 0.0099 |
| NORR_ECOSM  | Mesophiles        | 504 | 0.0079 |
| NORR_KLEP3  | Mesophiles        | 516 | 0.0484 |
| NORR_KLEP7  | Mesophiles        | 516 | 0.0523 |
| NORR_SALTY  | Mesophiles        | 506 | 0.0059 |
| NORR_SHIBS  | Mesophiles        | 504 | 0.0179 |
| NORR_SHIDS  | Mesophiles        | 504 | 0.0099 |
| NORR_SHIF8  | Mesophiles        | 504 | 0.0099 |
| NORR_SHISS  | Mesophiles        | 504 | 0.0179 |
| NORR_VIBVU  | Mesophiles        | 510 | 0.0333 |
| NORR_VIBVY  | Mesophiles        | 510 | 0.0314 |



|            |               |     |        |
|------------|---------------|-----|--------|
| NREC_STAA1 | Mesophiles    | 217 | 0.0046 |
| NREC_STAAB | Mesophiles    | 217 | 0.0046 |
| NREC_STAEQ | Mesophiles    | 218 | 0.0046 |
| NREC_STAES | Mesophiles    | 218 | 0.0046 |
| NREC_STAHJ | Mesophiles    | 217 | 0.0000 |
| NSRR_ECO24 | Mesophiles    | 141 | 0.0000 |
| NSRR_ECO45 | Mesophiles    | 141 | 0.0000 |
| NSRR_ECO5E | Mesophiles    | 141 | 0.0000 |
| NSRR_KLEP3 | Mesophiles    | 141 | 0.0000 |
| NSRR_PHOPR | Psychrophiles | 144 | 0.0000 |
| NSRR_SALTY | Mesophiles    | 141 | 0.0000 |
| NSRR_SHIB3 | Mesophiles    | 141 | 0.0000 |
| NSRR_VIBHB | Mesophiles    | 141 | 0.0000 |
| NSRR_VIBPA | Mesophiles    | 141 | 0.0000 |
| NSRR_VIBVU | Mesophiles    | 141 | 0.0000 |
| NSRR_YERE8 | Mesophiles    | 141 | 0.0000 |
| NSRR_YERPA | Mesophiles    | 141 | 0.0000 |
| NTDR_BACSU | Mesophiles    | 329 | 0.0000 |
| NTRC_ECO57 | Mesophiles    | 469 | 0.0917 |
| NTRC_KLEPN | Mesophiles    | 469 | 0.1322 |
| NTRC_SALTY | Mesophiles    | 469 | 0.1279 |
| NUSA_BACSU | Mesophiles    | 371 | 0.1321 |
| NUSA_COXBU | Mesophiles    | 503 | 0.0775 |
| NUSA_ECO57 | Mesophiles    | 495 | 0.0283 |
| NUSA_HAEIN | Mesophiles    | 495 | 0.0121 |
| NUSA_HELPJ | Mesophiles    | 395 | 0.0380 |
| NUSA_HELPY | Mesophiles    | 395 | 0.0304 |
| NUSA_MYCBO | Mesophiles    | 347 | 0.1527 |
| NUSA_MYCGE | Mesophiles    | 531 | 0.1620 |
| NUSA_MYCLE | Mesophiles    | 347 | 0.0865 |
| NUSA_MYCPN | Mesophiles    | 540 | 0.2500 |
| NUSA_SALTY | Mesophiles    | 500 | 0.0200 |
| NUSA_THET8 | Thermophiles  | 387 | 0.1447 |
| OHRR_BACSU | Mesophiles    | 147 | 0.0272 |
| OPRR_PSEAE | Mesophiles    | 306 | 0.0098 |
| ORUR_PSEAE | Mesophiles    | 339 | 0.0088 |
| OXYR_ECO57 | Mesophiles    | 305 | 0.0033 |
| OXYR_HAEIN | Mesophiles    | 301 | 0.0066 |
| OXYR_MYCAV | Mesophiles    | 311 | 0.0032 |
| OXYR_MYCLE | Mesophiles    | 311 | 0.0064 |
| P13_MYCMY  | Mesophiles    | 113 | 0.0000 |
| PAPX_ECOLX | Mesophiles    | 164 | 0.0061 |
| PCF_BACSU  | Mesophiles    | 169 | 0.1302 |
| PCHR_PSEAE | Mesophiles    | 296 | 0.0878 |
| PDHR_ECO57 | Mesophiles    | 254 | 0.0984 |
| PDHR_SALTY | Mesophiles    | 254 | 0.0984 |
| PDXR_CORGL | Mesophiles    | 453 | 0.2009 |
| PEPR_LACDL | Mesophiles    | 333 | 0.0060 |
| PERA_ECO27 | Mesophiles    | 274 | 0.0292 |
| PERR_BACSU | Mesophiles    | 145 | 0.0000 |

|             |               |     |        |
|-------------|---------------|-----|--------|
| PERR_ECOLI  | Mesophiles    | 297 | 0.0000 |
| PERR_STAA3  | Mesophiles    | 148 | 0.0000 |
| PERR_STAAM  | Mesophiles    | 148 | 0.0000 |
| PERR_STAEQ  | Mesophiles    | 150 | 0.0000 |
| PERR_STAHJ  | Mesophiles    | 150 | 0.0000 |
| PGTA_SALTY  | Mesophiles    | 415 | 0.0024 |
| PHNF_ECOLI  | Mesophiles    | 241 | 0.0332 |
| PHNF_MYCS2  | Mesophiles    | 244 | 0.0123 |
| PHNR_SALTY  | Mesophiles    | 239 | 0.0126 |
| PHNXW_CLOD6 | Mesophiles    | 636 | 0.0126 |
| PHYR_METEX  | Mesophiles    | 267 | 0.0150 |
| PHZR_PSEFL  | Mesophiles    | 244 | 0.0000 |
| PILR_PSEAE  | Mesophiles    | 445 | 0.0629 |
| PKSA_BACSU  | Mesophiles    | 205 | 0.0829 |
| POCR_SALTY  | Mesophiles    | 303 | 0.0825 |
| PRFA_LISMO  | Mesophiles    | 237 | 0.0000 |
| PRPR_ECOLI  | Mesophiles    | 528 | 0.0284 |
| PRPR_SALTY  | Mesophiles    | 541 | 0.0591 |
| PRSX_ECOL6  | Mesophiles    | 166 | 0.0422 |
| PSPF_ECOLI  | Mesophiles    | 325 | 0.0185 |
| PTSJ_SALTY  | Mesophiles    | 430 | 0.1070 |
| PTXR_PSEAE  | Mesophiles    | 312 | 0.0000 |
| PURR_ACTSZ  | Mesophiles    | 336 | 0.0119 |
| PURR_ECO24  | Mesophiles    | 341 | 0.0411 |
| PURR_ECO45  | Mesophiles    | 341 | 0.0381 |
| PURR_ECO57  | Mesophiles    | 341 | 0.0411 |
| PURR_ECOL6  | Mesophiles    | 341 | 0.0381 |
| PURR_ENTS8  | Mesophiles    | 341 | 0.0264 |
| PURR_HAEDU  | Mesophiles    | 339 | 0.0059 |
| PURR_HAEI8  | Mesophiles    | 336 | 0.0060 |
| PURR_HAEIG  | Mesophiles    | 336 | 0.0060 |
| PURR_HAEIN  | Mesophiles    | 336 | 0.0000 |
| PURR_HAES1  | Mesophiles    | 333 | 0.0000 |
| PURR_HAES2  | Mesophiles    | 333 | 0.0000 |
| PURR_KLEP3  | Mesophiles    | 341 | 0.0264 |
| PURR_KLEP7  | Mesophiles    | 341 | 0.0323 |
| PURR_MANSM  | Mesophiles    | 334 | 0.0060 |
| PURR_PASMU  | Mesophiles    | 334 | 0.0000 |
| PURR_PHOPR  | Psychrophiles | 334 | 0.0060 |
| PURR_SALTY  | Mesophiles    | 341 | 0.0381 |
| PURR_SHIDS  | Mesophiles    | 341 | 0.0411 |
| PURR_SHISS  | Mesophiles    | 341 | 0.0411 |
| PURR_VIBC3  | Mesophiles    | 336 | 0.0089 |
| PURR_VIBHB  | Mesophiles    | 334 | 0.0000 |
| PURR_VIBPA  | Mesophiles    | 334 | 0.0000 |
| PURR_VIBVU  | Mesophiles    | 334 | 0.0000 |
| PURR_YERE8  | Mesophiles    | 341 | 0.0440 |
| PURR_YERPA  | Mesophiles    | 341 | 0.0557 |
| PURR_YERPE  | Mesophiles    | 341 | 0.0440 |
| QACR_STAAM  | Mesophiles    | 188 | 0.0000 |

|            |                   |     |        |
|------------|-------------------|-----|--------|
| RACA_GEOKA | Thermophiles      | 172 | 0.3430 |
| RAFR_ECOLX | Mesophiles        | 336 | 0.0506 |
| RAFR_PEDPE | Mesophiles        | 277 | 0.0000 |
| RAMA_KLEPN | Mesophiles        | 113 | 0.0973 |
| RBSR_BACSU | Mesophiles        | 326 | 0.0215 |
| RBSR_ECO57 | Mesophiles        | 330 | 0.0303 |
| RBSR_HAEIN | Mesophiles        | 332 | 0.0000 |
| RBSR_LACLA | Mesophiles        | 327 | 0.0061 |
| RBSR_PASMU | Mesophiles        | 337 | 0.0000 |
| RCSA_ECO57 | Mesophiles        | 207 | 0.0097 |
| RCSA_SALTY | Mesophiles        | 207 | 0.0097 |
| RCSB_ECO57 | Mesophiles        | 216 | 0.0046 |
| RCSB_SALTY | Mesophiles        | 216 | 0.0093 |
| REG1_PYRAB | Hyperthermophiles | 155 | 0.0000 |
| REG1_PYRFU | Hyperthermophiles | 155 | 0.0000 |
| REG1_PYRHO | Hyperthermophiles | 155 | 0.0000 |
| REG2_PYRAB | Hyperthermophiles | 148 | 0.0000 |
| REG2_PYRFU | Hyperthermophiles | 148 | 0.0000 |
| REG2_PYRHO | Hyperthermophiles | 148 | 0.0000 |
| REG3_PYRAB | Hyperthermophiles | 158 | 0.0000 |
| REG3_PYRFU | Hyperthermophiles | 148 | 0.0000 |
| REG3_PYRHO | Hyperthermophiles | 158 | 0.0000 |
| REG4_PYRAB | Hyperthermophiles | 162 | 0.0000 |
| REG4_PYRFU | Hyperthermophiles | 162 | 0.0000 |
| REG4_PYRHO | Hyperthermophiles | 162 | 0.0000 |
| REG5_PYRHO | Hyperthermophiles | 159 | 0.0000 |
| REG6_PYRAB | Hyperthermophiles | 151 | 0.0132 |
| REG6_PYRFU | Hyperthermophiles | 151 | 0.0000 |
| REG6_PYRHO | Hyperthermophiles | 151 | 0.0132 |
| REG7_PYRAB | Hyperthermophiles | 141 | 0.0000 |
| REG7_PYRFU | Hyperthermophiles | 141 | 0.0000 |
| REG7_PYRHO | Hyperthermophiles | 141 | 0.0000 |
| REG8_PYRAB | Hyperthermophiles | 147 | 0.0000 |
| REG8_PYRFU | Hyperthermophiles | 148 | 0.0000 |
| REG8_PYRHO | Hyperthermophiles | 148 | 0.0000 |
| REG9_PYRAB | Hyperthermophiles | 150 | 0.0000 |
| REG9_PYRFU | Hyperthermophiles | 150 | 0.0000 |
| REG9_PYRHO | Hyperthermophiles | 150 | 0.0000 |
| REGA_CLOAB | Mesophiles        | 334 | 0.0000 |
| REMA_BACSU | Mesophiles        | 146 | 0.0000 |
| REMA_STAAU | Mesophiles        | 158 | 0.0000 |
| REMA_STAEP | Mesophiles        | 162 | 0.0000 |
| REX1_ENTFA | Mesophiles        | 216 | 0.0093 |
| REX1_THEMA | Hyperthermophiles | 208 | 0.0000 |
| REX2_ENTFA | Mesophiles        | 215 | 0.0140 |
| REX2_THEMA | Hyperthermophiles | 204 | 0.0000 |
| REX_BACC0  | Mesophiles        | 209 | 0.0048 |
| REX_BACC1  | Mesophiles        | 209 | 0.0048 |
| REX_BACC2  | Mesophiles        | 209 | 0.0048 |
| REX_BACC7  | Mesophiles        | 209 | 0.0048 |

|           |              |     |        |
|-----------|--------------|-----|--------|
| REX_BACCN | Mesophiles   | 209 | 0.0048 |
| REX_BACCZ | Mesophiles   | 209 | 0.0048 |
| REX_BACFN | Mesophiles   | 220 | 0.0636 |
| REX_BACSU | Mesophiles   | 215 | 0.0233 |
| REX_CALS8 | Thermophiles | 219 | 0.0000 |
| REX_CLOAB | Mesophiles   | 214 | 0.0000 |
| REX_CLOB1 | Mesophiles   | 210 | 0.0000 |
| REX_CLOBA | Mesophiles   | 210 | 0.0000 |
| REX_CLOBB | Mesophiles   | 210 | 0.0000 |
| REX_CLOBM | Mesophiles   | 210 | 0.0000 |
| REX_CLOD6 | Mesophiles   | 210 | 0.0000 |
| REX_CLOP1 | Mesophiles   | 212 | 0.0000 |
| REX_CLOPS | Mesophiles   | 212 | 0.0000 |
| REX_CLOTE | Mesophiles   | 211 | 0.0000 |
| REX_DEIRA | Mesophiles   | 234 | 0.0085 |
| REX_GEOKA | Thermophiles | 213 | 0.0282 |
| REX_GEOTN | Thermophiles | 213 | 0.0282 |
| REX_LACAC | Mesophiles   | 211 | 0.0000 |
| REX_LACBA | Mesophiles   | 212 | 0.0047 |
| REX_LACGA | Mesophiles   | 214 | 0.0047 |
| REX_LACLA | Mesophiles   | 216 | 0.0509 |
| REX_LACLC | Mesophiles   | 216 | 0.0509 |
| REX_LACLS | Mesophiles   | 216 | 0.0509 |
| REX_LACPL | Mesophiles   | 225 | 0.0578 |
| REX_LEUMM | Mesophiles   | 216 | 0.0185 |
| REX_LISIN | Mesophiles   | 215 | 0.0093 |
| REX_OCEIH | Mesophiles   | 209 | 0.0096 |
| REX_OENOB | Mesophiles   | 221 | 0.0000 |
| REX_PEDPA | Mesophiles   | 208 | 0.0000 |
| REX_PETMO | Thermophiles | 211 | 0.0095 |
| REX_PORG3 | Mesophiles   | 218 | 0.0000 |
| REX_PORGI | Mesophiles   | 218 | 0.0000 |
| REX_ROSCS | Thermophiles | 220 | 0.0182 |
| REX_RUBXD | Thermophiles | 216 | 0.0231 |
| REX_STAA1 | Mesophiles   | 211 | 0.0000 |
| REX_STAAB | Mesophiles   | 211 | 0.0000 |
| REX_STAEQ | Mesophiles   | 211 | 0.0000 |
| REX_STAES | Mesophiles   | 211 | 0.0000 |
| REX_STAHJ | Mesophiles   | 212 | 0.0000 |
| REX_STRA1 | Mesophiles   | 210 | 0.0000 |
| REX_STRA3 | Mesophiles   | 212 | 0.0000 |
| REX_STRAW | Mesophiles   | 252 | 0.1786 |
| REX_STRCO | Mesophiles   | 258 | 0.2171 |
| REX_STRMU | Mesophiles   | 213 | 0.0000 |
| REX_STRP1 | Mesophiles   | 214 | 0.0000 |
| REX_STRP2 | Mesophiles   | 213 | 0.0000 |
| REX_STRP4 | Mesophiles   | 213 | 0.0000 |
| REX_STRPB | Mesophiles   | 214 | 0.0000 |
| REX_STRPF | Mesophiles   | 214 | 0.0000 |
| REX_STRSU | Mesophiles   | 178 | 0.0056 |

|            |                   |     |        |
|------------|-------------------|-----|--------|
| REX_THEP1  | Hyperthermophiles | 208 | 0.0048 |
| REX_THEP3  | Thermophiles      | 224 | 0.0000 |
| REX_THET2  | Thermophiles      | 211 | 0.0000 |
| REX_THETN  | Hyperthermophiles | 224 | 0.0000 |
| REX_TREDE  | Mesophiles        | 210 | 0.0000 |
| RFAY_XANCP | Mesophiles        | 400 | 0.0275 |
| RHAR_ECO24 | Mesophiles        | 282 | 0.0284 |
| RHAR_ECO57 | Mesophiles        | 282 | 0.0284 |
| RHAR_ECOHS | Mesophiles        | 282 | 0.0284 |
| RHAR_ECOK1 | Mesophiles        | 282 | 0.0284 |
| RHAR_ENTS8 | Mesophiles        | 283 | 0.0353 |
| RHAR_KLEP7 | Mesophiles        | 281 | 0.0178 |
| RHAR_MANSM | Mesophiles        | 276 | 0.0072 |
| RHAR_SALTY | Mesophiles        | 282 | 0.0496 |
| RHAR_SHIDS | Mesophiles        | 282 | 0.0284 |
| RHAR_SHIF8 | Mesophiles        | 282 | 0.0284 |
| RHAR_YERPA | Mesophiles        | 290 | 0.0069 |
| RHAS_ECO24 | Mesophiles        | 278 | 0.0360 |
| RHAS_ECO45 | Mesophiles        | 278 | 0.0360 |
| RHAS_ECO57 | Mesophiles        | 278 | 0.0360 |
| RHAS_ECO8A | Mesophiles        | 278 | 0.0360 |
| RHAS_ECOL5 | Mesophiles        | 278 | 0.0360 |
| RHAS_ECOL6 | Mesophiles        | 278 | 0.0360 |
| RHAS_ECOSE | Mesophiles        | 278 | 0.0360 |
| RHAS_ECOSM | Mesophiles        | 278 | 0.0360 |
| RHAS_KLEP3 | Mesophiles        | 278 | 0.0000 |
| RHAS_KLEP7 | Mesophiles        | 278 | 0.0000 |
| RHAS_MANSM | Mesophiles        | 268 | 0.0149 |
| RHAS_SALTY | Mesophiles        | 278 | 0.0036 |
| RHAS_SHIB3 | Mesophiles        | 278 | 0.0360 |
| RHAS_SHIDS | Mesophiles        | 278 | 0.0324 |
| RHAS_SHIF8 | Mesophiles        | 278 | 0.0252 |
| RHAS_SHISS | Mesophiles        | 278 | 0.0360 |
| RHAS_YERPA | Mesophiles        | 273 | 0.0037 |
| RHAS_YERPG | Mesophiles        | 273 | 0.0037 |
| RHAS_YERPP | Mesophiles        | 273 | 0.0037 |
| RHIR_RHILV | Mesophiles        | 247 | 0.0000 |
| RHLR_PSEAE | Mesophiles        | 241 | 0.0000 |
| RIFK_ARCFU | Hyperthermophiles | 233 | 0.0000 |
| RIFK_CALMQ | Hyperthermophiles | 230 | 0.0000 |
| RIFK_METHJ | Mesophiles        | 221 | 0.0181 |
| RIFK_METLZ | Mesophiles        | 222 | 0.0045 |
| RIFK_METS5 | Thermophiles      | 217 | 0.0000 |
| RIFK_PYRAB | Hyperthermophiles | 212 | 0.0000 |
| RIFK_PYRFU | Hyperthermophiles | 212 | 0.0000 |
| RIFK_PYRHO | Hyperthermophiles | 212 | 0.0000 |
| RIFK_THEAC | Thermophiles      | 220 | 0.0000 |
| RIFK_THEVO | Thermophiles      | 220 | 0.0000 |
| RIPA_CORDI | Mesophiles        | 335 | 0.0925 |
| RIPA_COREF | Mesophiles        | 332 | 0.0452 |

|            |            |     |        |
|------------|------------|-----|--------|
| RIPA_CORGL | Mesophiles | 331 | 0.0967 |
| RNS_ECOLX  | Mesophiles | 265 | 0.0000 |
| ROB_ECO57  | Mesophiles | 289 | 0.0727 |
| ROCR_BACSU | Mesophiles | 461 | 0.0868 |
| ROT_STAA8  | Mesophiles | 166 | 0.0000 |
| ROT_STAAC  | Mesophiles | 166 | 0.0000 |
| ROT_STAAM  | Mesophiles | 166 | 0.0000 |
| ROT_STAAR  | Mesophiles | 166 | 0.0000 |
| RP28_BACCR | Mesophiles | 237 | 0.0169 |
| RP32_CAUCN | Mesophiles | 295 | 0.1254 |
| RP32_ECO57 | Mesophiles | 284 | 0.1232 |
| RP32_HAEIN | Mesophiles | 281 | 0.0214 |
| RP32_PSEAE | Mesophiles | 284 | 0.1620 |
| RP32_VIBCH | Mesophiles | 286 | 0.0350 |
| RP32_VIBVU | Mesophiles | 285 | 0.0351 |
| RP32_ZYMMO | Mesophiles | 302 | 0.1523 |
| RP35_BACCR | Mesophiles | 239 | 0.0000 |
| RP54_BACSU | Mesophiles | 436 | 0.1216 |
| RP54_BRAJA | Mesophiles | 484 | 0.1736 |
| RP54_CAUCR | Mesophiles | 497 | 0.1911 |
| RP54_ECOLI | Mesophiles | 477 | 0.1761 |
| RP54_HELPJ | Mesophiles | 414 | 0.0024 |
| RP54_HELPY | Mesophiles | 414 | 0.0000 |
| RP54_PSEAE | Mesophiles | 497 | 0.2254 |
| RP54_RALEH | Mesophiles | 73  | 0.1233 |
| RP54_RHOSH | Mesophiles | 434 | 0.0691 |
| RP54_SALTY | Mesophiles | 477 | 0.1908 |
| RP55_BRAJA | Mesophiles | 537 | 0.2980 |
| RPIR_ECOL6 | Mesophiles | 296 | 0.0000 |
| RPOD_BACSU | Mesophiles | 371 | 0.2075 |
| RPOD_CAUCR | Mesophiles | 652 | 0.2408 |
| RPOD_CHLMU | Mesophiles | 571 | 0.1208 |
| RPOD_CHLTR | Mesophiles | 571 | 0.1068 |
| RPOD_CLOAB | Mesophiles | 378 | 0.1190 |
| RPOD_COXBU | Mesophiles | 698 | 0.3209 |
| RPOD_ECOLI | Mesophiles | 613 | 0.2480 |
| RPOD_ENTFA | Mesophiles | 368 | 0.1902 |
| RPOD_HAEIN | Mesophiles | 629 | 0.3402 |
| RPOD_HELPJ | Mesophiles | 681 | 0.1395 |
| RPOD_HELPY | Mesophiles | 671 | 0.1162 |
| RPOD_LACLA | Mesophiles | 386 | 0.0881 |
| RPOD_LACLC | Mesophiles | 364 | 0.0742 |
| RPOD_LEPIC | Mesophiles | 585 | 0.0615 |
| RPOD_LISIN | Mesophiles | 374 | 0.2380 |
| RPOD_LISMO | Mesophiles | 374 | 0.2326 |
| RPOD_MYCBO | Mesophiles | 528 | 0.4527 |
| RPOD_MYCGE | Mesophiles | 497 | 0.2797 |
| RPOD_MYCPN | Mesophiles | 499 | 0.3126 |
| RPOD_MYXXA | Mesophiles | 708 | 0.3319 |
| RPOD_NEIGO | Mesophiles | 642 | 0.2321 |

|            |                   |     |        |
|------------|-------------------|-----|--------|
| RPOD_PSEAE | Mesophiles        | 617 | 0.3323 |
| RPOD_PSEFL | Mesophiles        | 615 | 0.3268 |
| RPOD_SALTY | Mesophiles        | 615 | 0.2813 |
| RPOD_STAA8 | Mesophiles        | 368 | 0.2283 |
| RPOD_STAAN | Mesophiles        | 368 | 0.2337 |
| RPOD_STAEQ | Mesophiles        | 368 | 0.2690 |
| RPOD_STRMU | Mesophiles        | 371 | 0.1348 |
| RPOD_STRPN | Mesophiles        | 369 | 0.1599 |
| RPOD_THEMA | Hyperthermophiles | 399 | 0.2431 |
| RPOD_XANAC | Mesophiles        | 625 | 0.2480 |
| RPOD_XANCP | Mesophiles        | 624 | 0.2500 |
| RPOD_XYLFA | Mesophiles        | 618 | 0.2799 |
| RPOD_XYLFT | Mesophiles        | 618 | 0.2799 |
| RPOE_ECO57 | Mesophiles        | 191 | 0.0157 |
| RPOE_HAEIN | Mesophiles        | 189 | 0.1111 |
| RPOE_MYCBO | Mesophiles        | 216 | 0.2917 |
| RPOE_SALTY | Mesophiles        | 191 | 0.0157 |
| RPOE_STRAW | Mesophiles        | 179 | 0.1844 |
| RPOE_STRCO | Mesophiles        | 177 | 0.1864 |
| RPOF_STRCO | Mesophiles        | 287 | 0.2056 |
| RPOM_ARCFU | Hyperthermophiles | 103 | 0.0000 |
| RPOM_SULAC | Thermophiles      | 111 | 0.0090 |
| RPOS_COXBU | Mesophiles        | 352 | 0.2841 |
| RPOS_ECOLI | Mesophiles        | 330 | 0.1303 |
| RPOS_PSEAE | Mesophiles        | 334 | 0.2066 |
| RPOS_SALTY | Mesophiles        | 330 | 0.1788 |
| RPOS_SHIFL | Mesophiles        | 330 | 0.1394 |
| RPOS_VIBCH | Mesophiles        | 335 | 0.0627 |
| RPOS_YEREN | Mesophiles        | 331 | 0.2145 |
| RPSB_BACSU | Mesophiles        | 262 | 0.0573 |
| RPSB_CORDI | Mesophiles        | 329 | 0.1611 |
| RPSB_MYXXA | Mesophiles        | 246 | 0.1301 |
| RPSC_MYCBO | Mesophiles        | 185 | 0.0973 |
| RPSC_MYXXA | Mesophiles        | 295 | 0.0576 |
| RPSD_BACSU | Mesophiles        | 254 | 0.0276 |
| RPSD_MYCBO | Mesophiles        | 212 | 0.0472 |
| RPSE_BACSU | Mesophiles        | 239 | 0.0000 |
| RPSE_CLOAB | Mesophiles        | 235 | 0.0000 |
| RPSF_BACSU | Mesophiles        | 255 | 0.0196 |
| RPSG_BACSU | Mesophiles        | 260 | 0.0154 |
| RPSG_CLOAB | Mesophiles        | 257 | 0.0039 |
| RPSH_BACSU | Mesophiles        | 218 | 0.0000 |
| RPSH_PSEAE | Mesophiles        | 193 | 0.0622 |
| RPSK_BACSU | Mesophiles        | 294 | 0.0204 |
| RPSW_STRCO | Mesophiles        | 280 | 0.1357 |
| RUTR_ECO57 | Mesophiles        | 212 | 0.0094 |
| RUTR_ECOL6 | Mesophiles        | 212 | 0.0094 |
| SACR_LACLA | Mesophiles        | 318 | 0.0000 |
| SARS_STAA1 | Mesophiles        | 250 | 0.0160 |
| SARS_STAAR | Mesophiles        | 250 | 0.0160 |

|            |               |     |        |
|------------|---------------|-----|--------|
| SARU_STAA8 | Mesophiles    | 247 | 0.0000 |
| SARU_STAAC | Mesophiles    | 247 | 0.0000 |
| SARV_STAA8 | Mesophiles    | 116 | 0.0000 |
| SARZ_STAA3 | Mesophiles    | 148 | 0.0000 |
| SARZ_STAAB | Mesophiles    | 148 | 0.0000 |
| SARZ_STAAR | Mesophiles    | 148 | 0.0068 |
| SARZ_STAEQ | Mesophiles    | 148 | 0.0068 |
| SARZ_STAHJ | Mesophiles    | 147 | 0.0000 |
| SCRR_KLEPN | Mesophiles    | 334 | 0.0180 |
| SCRR_PEDPE | Mesophiles    | 326 | 0.0215 |
| SCRR_SALTY | Mesophiles    | 334 | 0.0180 |
| SCRR_STRMU | Mesophiles    | 320 | 0.0094 |
| SDIA_ECOLI | Mesophiles    | 240 | 0.0125 |
| SDPR_BACSU | Mesophiles    | 90  | 0.0000 |
| SGCR_ECOLI | Mesophiles    | 260 | 0.0077 |
| SIGK_MYCBO | Mesophiles    | 187 | 0.0107 |
| SIGK_MYCUA | Mesophiles    | 187 | 0.0749 |
| SIGK_MYCVP | Mesophiles    | 196 | 0.0204 |
| SIGM_BACSU | Mesophiles    | 163 | 0.0000 |
| SIGO_BACSU | Mesophiles    | 176 | 0.2784 |
| SIGS_STAA1 | Mesophiles    | 156 | 0.0000 |
| SIGS_STAA3 | Mesophiles    | 156 | 0.0000 |
| SIGS_STAA8 | Mesophiles    | 156 | 0.0000 |
| SIGS_STAAB | Mesophiles    | 156 | 0.0000 |
| SIGS_STAAR | Mesophiles    | 156 | 0.0000 |
| SIGV_BACSU | Mesophiles    | 166 | 0.0000 |
| SIGW_BACSU | Mesophiles    | 187 | 0.0000 |
| SIGX_BACSU | Mesophiles    | 194 | 0.0825 |
| SIGY_BACSU | Mesophiles    | 178 | 0.0506 |
| SIGZ_BACSU | Mesophiles    | 176 | 0.0000 |
| SINR_SALTY | Mesophiles    | 315 | 0.0000 |
| SIRC_SALTY | Mesophiles    | 295 | 0.0000 |
| SKGA_CAUCN | Mesophiles    | 255 | 0.0392 |
| SLMA_ECO24 | Mesophiles    | 198 | 0.0303 |
| SLMA_ECOL5 | Mesophiles    | 198 | 0.0303 |
| SLMA_ENTS8 | Mesophiles    | 198 | 0.0303 |
| SLMA_HAEDU | Mesophiles    | 202 | 0.0149 |
| SLMA_HAEI8 | Mesophiles    | 218 | 0.0505 |
| SLMA_IDILO | Mesophiles    | 196 | 0.0255 |
| SLMA_KLEP7 | Mesophiles    | 198 | 0.0303 |
| SLMA_MANSM | Mesophiles    | 216 | 0.1019 |
| SLMA_PASMU | Mesophiles    | 199 | 0.0402 |
| SLMA_PHOPR | Psychrophiles | 196 | 0.0255 |
| SLMA_SALTY | Mesophiles    | 198 | 0.0303 |
| SLMA_SHEAM | Mesophiles    | 197 | 0.0000 |
| SLMA_SHEDO | Mesophiles    | 197 | 0.0051 |
| SLMA_SHEFN | Mesophiles    | 197 | 0.0051 |
| SLMA_SHESH | Psychrophiles | 197 | 0.0000 |
| SLMA_VIBCH | Mesophiles    | 196 | 0.0051 |
| SLMA_VIBHB | Mesophiles    | 196 | 0.0255 |



|            |                   |     |        |
|------------|-------------------|-----|--------|
| SLMA_VIBPA | Mesophiles        | 196 | 0.0204 |
| SLMA_VIBVU | Mesophiles        | 196 | 0.0153 |
| SLMA_YERE8 | Mesophiles        | 198 | 0.0354 |
| SLMA_YERPA | Mesophiles        | 198 | 0.0354 |
| SLYA_ECO24 | Mesophiles        | 144 | 0.0069 |
| SLYA_ECO27 | Mesophiles        | 144 | 0.0069 |
| SLYA_SALTY | Mesophiles        | 144 | 0.0139 |
| SLYA_YERE8 | Mesophiles        | 143 | 0.0070 |
| SLYA_YERPA | Mesophiles        | 143 | 0.0070 |
| SLYA_YERPE | Mesophiles        | 143 | 0.0070 |
| SOPA_ECO57 | Mesophiles        | 388 | 0.0361 |
| SORC_KLEPN | Mesophiles        | 315 | 0.0000 |
| SOXR_CHRVO | Mesophiles        | 148 | 0.0000 |
| SOXR_ECO57 | Mesophiles        | 154 | 0.1104 |
| SOXR_PSEAE | Mesophiles        | 156 | 0.1282 |
| SOXR_SALTY | Mesophiles        | 152 | 0.0395 |
| SOXS_ECO57 | Mesophiles        | 107 | 0.0000 |
| SOXS_SALTY | Mesophiles        | 107 | 0.0000 |
| SPOA_BACCE | Mesophiles        | 150 | 0.0067 |
| SPOA_BACCR | Mesophiles        | 264 | 0.0000 |
| SPOA_BACSU | Mesophiles        | 267 | 0.0599 |
| SPOA_CLOAB | Mesophiles        | 281 | 0.0142 |
| SPOA_CLODI | Mesophiles        | 274 | 0.0474 |
| SPOA_MOOTA | Thermophiles      | 256 | 0.0352 |
| SP3D_BACSU | Mesophiles        | 93  | 0.0645 |
| SRLR_ECOLI | Mesophiles        | 257 | 0.0156 |
| SYFA_METKA | Hyperthermophiles | 524 | 0.1718 |
| SYFA_PYRAB | Hyperthermophiles | 500 | 0.0020 |
| SYFA_SULAC | Thermophiles      | 465 | 0.0000 |
| TBP1_METAC | Mesophiles        | 183 | 0.0164 |
| TBP1_METMA | Mesophiles        | 183 | 0.0000 |
| TBP2_METAC | Mesophiles        | 185 | 0.0000 |
| TBP2_METMA | Mesophiles        | 183 | 0.0164 |
| TBP3_METAC | Mesophiles        | 185 | 0.0000 |
| TBP3_METMA | Mesophiles        | 185 | 0.0000 |
| TBP_AERPE  | Hyperthermophiles | 203 | 0.0000 |
| TBP_ARCFU  | Hyperthermophiles | 183 | 0.0109 |
| TBP_HALMA  | Mesophiles        | 186 | 0.0269 |
| TBP_META3  | Mesophiles        | 181 | 0.0331 |
| TBP_METKA  | Hyperthermophiles | 185 | 0.0054 |
| TBP_METM6  | Mesophiles        | 181 | 0.0000 |
| TBP_METM7  | Mesophiles        | 181 | 0.0000 |
| TBP_METMP  | Mesophiles        | 181 | 0.0000 |
| TBP_METS3  | Mesophiles        | 181 | 0.0000 |
| TBP_METST  | Mesophiles        | 183 | 0.0000 |
| TBP_METTP  | Thermophiles      | 183 | 0.0000 |
| TBP_METVS  | Mesophiles        | 181 | 0.0000 |
| TBP_PICTO  | Thermophiles      | 184 | 0.0000 |
| TBP_PYRAB  | Hyperthermophiles | 191 | 0.0000 |
| TBP_PYRAE  | Hyperthermophiles | 199 | 0.0302 |

|             |                   |     |        |
|-------------|-------------------|-----|--------|
| TBP_PYRCJ   | Hyperthermophiles | 199 | 0.0804 |
| TBP_PYRFU   | Hyperthermophiles | 191 | 0.0000 |
| TBP_PYRHO   | Hyperthermophiles | 191 | 0.0000 |
| TBP_PYRIL   | Thermophiles      | 199 | 0.0402 |
| TBP_SULAC   | Thermophiles      | 197 | 0.0000 |
| TBP_SULSO   | Hyperthermophiles | 198 | 0.0000 |
| TBP_SULTO   | Hyperthermophiles | 198 | 0.0000 |
| TBP_THEAC   | Thermophiles      | 184 | 0.0000 |
| TBP_THEVO   | Thermophiles      | 184 | 0.0000 |
| TCAR_STAAC  | Mesophiles        | 151 | 0.0066 |
| TCPN_VIBC3  | Mesophiles        | 276 | 0.0000 |
| TDCA_ECO57  | Mesophiles        | 312 | 0.0000 |
| TETC_ECOLX  | Mesophiles        | 197 | 0.0305 |
| TETD_ECOLX  | Mesophiles        | 138 | 0.0000 |
| TETR1_ECOLX | Mesophiles        | 216 | 0.1481 |
| TETR2_ECOLX | Mesophiles        | 207 | 0.1014 |
| TETR3_ECOLX | Mesophiles        | 219 | 0.1416 |
| TETR4_ECOLX | Mesophiles        | 218 | 0.0826 |
| TETR5_ECOLX | Mesophiles        | 211 | 0.0948 |
| TETR8_PASMU | Mesophiles        | 207 | 0.1111 |
| TF2B1_SULSO | Hyperthermophiles | 309 | 0.0809 |
| TF2B1_THEAC | Thermophiles      | 312 | 0.0865 |
| TF2B1_THEVO | Thermophiles      | 312 | 0.0801 |
| TF2B2_SULSO | Hyperthermophiles | 293 | 0.0683 |
| TF2B2_THEAC | Thermophiles      | 307 | 0.0749 |
| TF2B2_THEVO | Thermophiles      | 313 | 0.0639 |
| TF2B_AERPE  | Hyperthermophiles | 322 | 0.2919 |
| TF2B_ARCFU  | Hyperthermophiles | 326 | 0.0123 |
| TF2B_CALMQ  | Hyperthermophiles | 336 | 0.0982 |
| TF2B_META3  | Mesophiles        | 334 | 0.0000 |
| TF2B_METAC  | Mesophiles        | 337 | 0.0564 |
| TF2B_METKA  | Hyperthermophiles | 307 | 0.1792 |
| TF2B_METM5  | Mesophiles        | 339 | 0.0118 |
| TF2B_METM6  | Mesophiles        | 339 | 0.0206 |
| TF2B_METM7  | Mesophiles        | 339 | 0.0354 |
| TF2B_METMA  | Mesophiles        | 337 | 0.0682 |
| TF2B_METMJ  | Mesophiles        | 337 | 0.0772 |
| TF2B_METMP  | Mesophiles        | 339 | 0.0265 |
| TF2B_METS3  | Mesophiles        | 310 | 0.0161 |
| TF2B_METST  | Mesophiles        | 311 | 0.0804 |
| TF2B_METTP  | Thermophiles      | 337 | 0.0534 |
| TF2B_PYRAB  | Hyperthermophiles | 300 | 0.0200 |
| TF2B_PYRAE  | Hyperthermophiles | 333 | 0.0541 |
| TF2B_PYRAR  | Hyperthermophiles | 333 | 0.0180 |
| TF2B_PYRFU  | Hyperthermophiles | 300 | 0.0200 |
| TF2B_PYRHO  | Hyperthermophiles | 300 | 0.0200 |
| TF2B_PYRIL  | Thermophiles      | 333 | 0.0480 |
| TF2B_SULAC  | Thermophiles      | 307 | 0.0912 |
| TF2B_SULTO  | Hyperthermophiles | 308 | 0.1623 |
| TFDR_RALEJ  | Mesophiles        | 295 | 0.0034 |

|             |            |     |        |
|-------------|------------|-----|--------|
| TFDS_RALEJ  | Mesophiles | 295 | 0.0034 |
| TFDT_RALEJ  | Mesophiles | 228 | 0.0000 |
| TIPA_STRCO  | Mesophiles | 253 | 0.2609 |
| TNRA_BACSU  | Mesophiles | 110 | 0.1909 |
| TRAJ8_ECOLX | Mesophiles | 149 | 0.0000 |
| TRER_BACSU  | Mesophiles | 238 | 0.0126 |
| TRER_ECOLI  | Mesophiles | 315 | 0.0286 |
| TRER_SALTY  | Mesophiles | 315 | 0.0825 |
| TRPI_PSEAE  | Mesophiles | 295 | 0.0068 |
| TRPO_PSEAE  | Mesophiles | 207 | 0.0242 |
| TRPR_ACTSZ  | Mesophiles | 101 | 0.0594 |
| TRPR_CHLCV  | Mesophiles | 101 | 0.0099 |
| TRPR_CHLT2  | Mesophiles | 94  | 0.0000 |
| TRPR_CHLTA  | Mesophiles | 94  | 0.0000 |
| TRPR_ECO24  | Mesophiles | 108 | 0.0463 |
| TRPR_ECO45  | Mesophiles | 108 | 0.0463 |
| TRPR_ECO71  | Mesophiles | 108 | 0.0463 |
| TRPR_ECOSM  | Mesophiles | 108 | 0.0556 |
| TRPR_ENTS8  | Mesophiles | 109 | 0.0826 |
| TRPR_HAEI8  | Mesophiles | 101 | 0.0495 |
| TRPR_HAES1  | Mesophiles | 106 | 0.0849 |
| TRPR_HAES2  | Mesophiles | 106 | 0.0849 |
| TRPR_KLEP3  | Mesophiles | 109 | 0.0459 |
| TRPR_KLEP7  | Mesophiles | 109 | 0.0459 |
| TRPR_MANSM  | Mesophiles | 101 | 0.1287 |
| TRPR_PASMU  | Mesophiles | 102 | 0.1078 |
| TRPR_SALTY  | Mesophiles | 108 | 0.0463 |
| TRPR_VIBCH  | Mesophiles | 103 | 0.3301 |
| TRPR_VIBHB  | Mesophiles | 100 | 0.3400 |
| TRPR_VIBPA  | Mesophiles | 103 | 0.1359 |
| TRPR_VIBVU  | Mesophiles | 102 | 0.2353 |
| TRPR_XYLF2  | Mesophiles | 92  | 0.0000 |
| TRPR_XYLFA  | Mesophiles | 92  | 0.0000 |
| TRPR_YERE8  | Mesophiles | 110 | 0.0545 |
| TRPR_YERPE  | Mesophiles | 125 | 0.2480 |
| TTDR_ECO57  | Mesophiles | 310 | 0.0000 |
| TTDR_ECOL5  | Mesophiles | 310 | 0.0000 |
| TTDR_ECOL6  | Mesophiles | 310 | 0.0000 |
| TTDR_ECOLI  | Mesophiles | 310 | 0.0000 |
| UHPA_ECO57  | Mesophiles | 196 | 0.0255 |
| UHPA_SALTY  | Mesophiles | 196 | 0.0204 |
| UIDR_ECO57  | Mesophiles | 196 | 0.0663 |
| ULAR_ECO24  | Mesophiles | 251 | 0.1514 |
| ULAR_ECO71  | Mesophiles | 251 | 0.1235 |
| ULAR_SALTY  | Mesophiles | 251 | 0.1474 |
| ULAR_SHIDS  | Mesophiles | 251 | 0.1554 |
| ULAR_SHIF8  | Mesophiles | 251 | 0.1275 |
| ULAR_SHISS  | Mesophiles | 251 | 0.1554 |
| URER_ECOLX  | Mesophiles | 296 | 0.0068 |
| UVRC_BACSU  | Mesophiles | 598 | 0.0033 |

|             |                   |     |        |
|-------------|-------------------|-----|--------|
| UVRY_ECO57  | Mesophiles        | 218 | 0.0275 |
| UVRY_ECOLI  | Mesophiles        | 218 | 0.0275 |
| UXUR_ECOLI  | Mesophiles        | 257 | 0.1595 |
| UXUR_HAEIN  | Mesophiles        | 266 | 0.0000 |
| VFR_PSEAE   | Mesophiles        | 214 | 0.0093 |
| VIRF_SHIDY  | Mesophiles        | 262 | 0.0000 |
| VIRF_YERE8  | Mesophiles        | 271 | 0.0000 |
| VIRF_YEREN  | Mesophiles        | 271 | 0.0000 |
| VIRS_MYCTU  | Mesophiles        | 340 | 0.0147 |
| VJBR_BRUA2  | Mesophiles        | 259 | 0.0000 |
| VJBR_BRUO2  | Mesophiles        | 259 | 0.0000 |
| VQSM_PSEAE  | Mesophiles        | 325 | 0.0031 |
| VRAR_STAA1  | Mesophiles        | 209 | 0.0000 |
| VRAR_STAAC  | Mesophiles        | 209 | 0.0000 |
| VRAR_STAEQ  | Mesophiles        | 209 | 0.0000 |
| VRAR_STAHJ  | Mesophiles        | 209 | 0.0000 |
| VRPR_SALTY  | Mesophiles        | 297 | 0.0000 |
| XAPR_ECOLI  | Mesophiles        | 294 | 0.0000 |
| XYLR_ECO57  | Mesophiles        | 392 | 0.0000 |
| XYLR_HAEIN  | Mesophiles        | 387 | 0.0155 |
| Y043_MYCTU  | Mesophiles        | 244 | 0.0205 |
| Y069_CHLTR  | Mesophiles        | 451 | 0.0488 |
| Y077_STAAW  | Mesophiles        | 745 | 0.0188 |
| Y084_STAAC  | Mesophiles        | 745 | 0.0188 |
| Y086_METMP  | Mesophiles        | 149 | 0.0872 |
| Y089_PASMU  | Mesophiles        | 67  | 0.0896 |
| Y097_STAAN  | Mesophiles        | 745 | 0.0188 |
| Y097_STAAR  | Mesophiles        | 191 | 0.0366 |
| Y1005_METKA | Hyperthermophiles | 325 | 0.1169 |
| Y1009_HAEIN | Mesophiles        | 256 | 0.0352 |
| Y1011_ZYMMO | Mesophiles        | 61  | 0.1148 |
| Y1018_STRA3 | Mesophiles        | 110 | 0.0000 |
| Y1018_STRPC | Mesophiles        | 113 | 0.0000 |
| Y101_MYCGE  | Mesophiles        | 222 | 0.0000 |
| Y103_KLEP7  | Mesophiles        | 64  | 0.3125 |
| Y1047_YERPG | Mesophiles        | 68  | 0.3529 |
| Y1052_HAEIN | Mesophiles        | 298 | 0.0201 |
| Y1056_HAEI8 | Mesophiles        | 68  | 0.0735 |
| Y1061_STRMU | Mesophiles        | 110 | 0.0000 |
| Y1069_LACLM | Mesophiles        | 111 | 0.0000 |
| Y1079_STAAN | Mesophiles        | 110 | 0.0091 |
| Y107_STAAR  | Mesophiles        | 745 | 0.0188 |
| Y1098_METVS | Mesophiles        | 142 | 0.0352 |
| Y1102_STAES | Mesophiles        | 255 | 0.0157 |
| Y1122_STRGC | Mesophiles        | 110 | 0.0000 |
| Y1129_HAEDU | Mesophiles        | 62  | 0.0000 |
| Y1143_METST | Mesophiles        | 350 | 0.1600 |
| Y1143_STRP2 | Mesophiles        | 110 | 0.0000 |
| Y1182_STRP4 | Mesophiles        | 110 | 0.0000 |
| Y1195_CLOBA | Mesophiles        | 109 | 0.0000 |

|             |                   |     |        |
|-------------|-------------------|-----|--------|
| Y1195_GEOKA | Thermophiles      | 110 | 0.0000 |
| Y1212_STAAR | Mesophiles        | 110 | 0.0000 |
| Y1218_GEOSL | Mesophiles        | 61  | 0.3279 |
| Y1244_CLOBB | Mesophiles        | 109 | 0.0000 |
| Y1247_CLOTE | Mesophiles        | 117 | 0.0000 |
| Y1255_MYCTU | Mesophiles        | 202 | 0.0545 |
| Y1260_BRAJA | Mesophiles        | 60  | 0.2000 |
| Y1266_PYRAB | Hyperthermophiles | 110 | 0.0182 |
| Y1268_SULTO | Hyperthermophiles | 299 | 0.0000 |
| Y1277_CHLTE | Thermophiles      | 197 | 0.3452 |
| Y1278_THEP3 | Thermophiles      | 117 | 0.0000 |
| Y1288_STRPN | Mesophiles        | 110 | 0.0000 |
| Y1298_BACC2 | Mesophiles        | 110 | 0.0000 |
| Y1300_PYRAB | Hyperthermophiles | 145 | 0.0000 |
| Y1344_SULAC | Thermophiles      | 305 | 0.0000 |
| Y1353_MYCTU | Mesophiles        | 261 | 0.2759 |
| Y1363_THEAC | Thermophiles      | 312 | 0.0000 |
| Y1364_HAEIN | Mesophiles        | 288 | 0.0174 |
| Y1378_NEIMB | Mesophiles        | 148 | 0.0068 |
| Y1394_FUSNN | Mesophiles        | 103 | 0.0000 |
| Y1395_MYCTU | Mesophiles        | 344 | 0.0116 |
| Y142_AERPE  | Hyperthermophiles | 180 | 0.0389 |
| Y1435_PYRAB | Hyperthermophiles | 333 | 0.0390 |
| Y143_HAEIN  | Mesophiles        | 288 | 0.0069 |
| Y1459_HAEIN | Mesophiles        | 194 | 0.0155 |
| Y1463_THETN | Hyperthermophiles | 117 | 0.0085 |
| Y1514_METVS | Mesophiles        | 327 | 0.0183 |
| Y1530_OCEIH | Mesophiles        | 105 | 0.0000 |
| Y1556_MYCTU | Mesophiles        | 202 | 0.0743 |
| Y1603_LACC3 | Mesophiles        | 113 | 0.0000 |
| Y160_METLZ  | Mesophiles        | 317 | 0.1230 |
| Y1619_VIBVU | Mesophiles        | 64  | 0.3906 |
| Y161_STAAB  | Mesophiles        | 252 | 0.0000 |
| Y1627_PYRAE | Hyperthermophiles | 250 | 0.0080 |
| Y1634_LACPL | Mesophiles        | 115 | 0.0000 |
| Y165_STAES  | Mesophiles        | 251 | 0.0000 |
| Y1672_NEIG1 | Mesophiles        | 69  | 0.1739 |
| Y1673_BRUME | Mesophiles        | 57  | 0.3333 |
| Y1678_STAHJ | Mesophiles        | 110 | 0.0000 |
| Y1686_CLOPS | Mesophiles        | 112 | 0.0000 |
| Y1701_ENTFA | Mesophiles        | 112 | 0.0000 |
| Y1702_METM7 | Mesophiles        | 326 | 0.0460 |
| Y1714_CLOPE | Mesophiles        | 112 | 0.0000 |
| Y1731_HYPNA | Mesophiles        | 73  | 0.3973 |
| Y1753_CLOAB | Mesophiles        | 116 | 0.0000 |
| Y1758_BACCZ | Mesophiles        | 147 | 0.0612 |
| Y1787_ARCFU | Hyperthermophiles | 309 | 0.0000 |
| Y1802_LISMO | Mesophiles        | 110 | 0.0000 |
| Y1808_PYRHO | Hyperthermophiles | 315 | 0.0032 |
| Y1811_METBU | Mesophiles        | 323 | 0.0557 |

|             |                   |     |        |
|-------------|-------------------|-----|--------|
| Y1813_NEIMO | Mesophiles        | 69  | 0.0290 |
| Y1816_MYCTU | Mesophiles        | 234 | 0.0000 |
| Y1827_CLOBM | Mesophiles        | 110 | 0.0000 |
| Y1828_MYCTU | Mesophiles        | 247 | 0.0000 |
| Y1829_LISMF | Mesophiles        | 110 | 0.0000 |
| Y1830_MYCTU | Mesophiles        | 225 | 0.3156 |
| Y1842_NEIMF | Mesophiles        | 69  | 0.1594 |
| Y184_STAA8  | Mesophiles        | 252 | 0.0000 |
| Y1851_PYRFU | Hyperthermophiles | 315 | 0.0159 |
| Y186_HAEIN  | Mesophiles        | 135 | 0.0000 |
| Y189_CLOPE  | Mesophiles        | 279 | 0.0036 |
| Y1916_LISIN | Mesophiles        | 110 | 0.0000 |
| Y191_CLOAB  | Mesophiles        | 283 | 0.0177 |
| Y1936_BACCR | Mesophiles        | 147 | 0.0612 |
| Y1968_CLOP1 | Mesophiles        | 112 | 0.0000 |
| Y1985_MYCTU | Mesophiles        | 303 | 0.0528 |
| Y199_HALMA  | Mesophiles        | 159 | 0.0881 |
| Y2019_BACC1 | Mesophiles        | 147 | 0.0748 |
| Y2057_DESRM | Mesophiles        | 117 | 0.0085 |
| Y2090_METCA | Thermophiles      | 73  | 0.3562 |
| Y210_METM6  | Mesophiles        | 327 | 0.0306 |
| Y211_THETN  | Hyperthermophiles | 282 | 0.0000 |
| Y213_SINMW  | Mesophiles        | 70  | 0.3857 |
| Y2140_MYCLE | Mesophiles        | 143 | 0.0769 |
| Y214_STAAR  | Mesophiles        | 252 | 0.0000 |
| Y2158_NEIMA | Mesophiles        | 69  | 0.1594 |
| Y215_STAAN  | Mesophiles        | 252 | 0.0000 |
| Y2190_CLOBK | Mesophiles        | 110 | 0.0000 |
| Y224_HAEIN  | Mesophiles        | 168 | 0.0000 |
| Y2250_MYCTU | Mesophiles        | 189 | 0.0159 |
| Y2274_MYCBO | Mesophiles        | 189 | 0.0159 |
| Y2282_MYCTU | Mesophiles        | 312 | 0.0641 |
| Y2310_MYCTU | Mesophiles        | 114 | 0.0877 |
| Y2340_CAUCR | Mesophiles        | 57  | 0.3509 |
| Y2347_METMJ | Mesophiles        | 304 | 0.0329 |
| Y2364_STAAN | Mesophiles        | 185 | 0.0162 |
| Y2365_THIDA | Mesophiles        | 69  | 0.3333 |
| Y2383_VIBCH | Mesophiles        | 286 | 0.0420 |
| Y239_MYCPN  | Mesophiles        | 222 | 0.0000 |
| Y2406_STAEQ | Mesophiles        | 251 | 0.0080 |
| Y2429_VIBCH | Mesophiles        | 65  | 0.3846 |
| Y2452_STAAB | Mesophiles        | 185 | 0.0000 |
| Y2498_BACCN | Mesophiles        | 110 | 0.0000 |
| Y2506_CLOBL | Mesophiles        | 110 | 0.0000 |
| Y2515_STAA3 | Mesophiles        | 185 | 0.0162 |
| Y2519_HALMA | Mesophiles        | 322 | 0.2702 |
| Y2529_VIBPA | Mesophiles        | 64  | 0.3750 |
| Y2548_METHJ | Mesophiles        | 306 | 0.0588 |
| Y2658_STAAR | Mesophiles        | 185 | 0.0162 |
| Y2784_VIBVY | Mesophiles        | 64  | 0.3906 |

|             |                   |     |        |
|-------------|-------------------|-----|--------|
| Y280_BRUA2  | Mesophiles        | 57  | 0.2807 |
| Y2819_SYNFM | Mesophiles        | 156 | 0.1154 |
| Y2887_MYCTU | Mesophiles        | 139 | 0.0935 |
| Y2912_MYCTU | Mesophiles        | 195 | 0.0256 |
| Y293_HAEIN  | Mesophiles        | 128 | 0.0000 |
| Y294_THEVO  | Thermophiles      | 312 | 0.0000 |
| Y300_SHEWM  | Mesophiles        | 70  | 0.0000 |
| Y3073_RHOS4 | Mesophiles        | 456 | 0.1360 |
| Y3206_PHOPR | Psychrophiles     | 76  | 0.3684 |
| Y3238_ENTS8 | Mesophiles        | 67  | 0.3582 |
| Y326_THEMA  | Hyperthermophiles | 280 | 0.0000 |
| Y329_MYCPN  | Mesophiles        | 158 | 0.0000 |
| Y330_NEIMB  | Mesophiles        | 69  | 0.1594 |
| Y3394_SHEDO | Mesophiles        | 74  | 0.0000 |
| Y3405_MYCTU | Mesophiles        | 188 | 0.0957 |
| Y341_CHLMU  | Mesophiles        | 447 | 0.0224 |
| Y3524_METAC | Mesophiles        | 328 | 0.0579 |
| Y358_MANSM  | Mesophiles        | 72  | 0.1667 |
| Y364_SHEAM  | Mesophiles        | 71  | 0.0000 |
| Y367_PYRAB  | Hyperthermophiles | 316 | 0.0032 |
| Y377_MYCTU  | Mesophiles        | 321 | 0.0000 |
| Y377_PSEHT  | Psychrophiles     | 76  | 0.0658 |
| Y379_HAEIN  | Mesophiles        | 150 | 0.0000 |
| Y3823_CHRVO | Mesophiles        | 63  | 0.2857 |
| Y3874_AERHH | Mesophiles        | 64  | 0.3125 |
| Y3946_HALS3 | Thermophiles      | 320 | 0.1906 |
| Y4158_STRCO | Mesophiles        | 340 | 0.0412 |
| Y4167_CLOAB | Mesophiles        | 184 | 0.0000 |
| Y420_SHESH  | Psychrophiles     | 70  | 0.0000 |
| Y424_MYCPN  | Mesophiles        | 102 | 0.0098 |
| Y428_MYCGE  | Mesophiles        | 171 | 0.0000 |
| Y444_METMA  | Mesophiles        | 327 | 0.0642 |
| Y4452_COLP3 | Psychrophiles     | 78  | 0.0000 |
| Y447_IDILO  | Mesophiles        | 64  | 0.3125 |
| Y4530_PSEAE | Mesophiles        | 66  | 0.2121 |
| Y453_METS3  | Mesophiles        | 313 | 0.0224 |
| Y4628_STRCO | Mesophiles        | 269 | 0.2937 |
| Y4637_KLEP3 | Mesophiles        | 64  | 0.3125 |
| Y4778_PSEAE | Mesophiles        | 132 | 0.0076 |
| Y480_MYCCT  | Mesophiles        | 113 | 0.0000 |
| Y4824_PSEPF | Mesophiles        | 66  | 0.3030 |
| Y494_MYCTU  | Mesophiles        | 242 | 0.1446 |
| Y5291_PSEF5 | Mesophiles        | 67  | 0.3134 |
| Y529_ARCFU  | Hyperthermophiles | 74  | 0.0135 |
| Y535_PYRFU  | Hyperthermophiles | 142 | 0.0000 |
| Y557_PICTO  | Thermophiles      | 311 | 0.0000 |
| Y570_HAEIN  | Mesophiles        | 205 | 0.0000 |
| Y586_MYCTU  | Mesophiles        | 240 | 0.0667 |
| Y603_AQUAE  | Hyperthermophiles | 272 | 0.0000 |
| Y614_PYRHO  | Hyperthermophiles | 332 | 0.0361 |

|            |                   |     |        |
|------------|-------------------|-----|--------|
| Y620_PYRFU | Hyperthermophiles | 108 | 0.0278 |
| Y626_MYCPN | Mesophiles        | 172 | 0.0000 |
| Y678_METMP | Mesophiles        | 326 | 0.0337 |
| Y683_YERE8 | Mesophiles        | 68  | 0.3235 |
| Y763_PYRHO | Hyperthermophiles | 143 | 0.0000 |
| Y767_MYCTU | Mesophiles        | 213 | 0.1174 |
| Y771_CLOTH | Thermophiles      | 117 | 0.0000 |
| Y775_HAEIN | Mesophiles        | 315 | 0.0000 |
| Y778_AERPE | Hyperthermophiles | 329 | 0.0213 |
| Y802_STAEQ | Mesophiles        | 110 | 0.0000 |
| Y803_PYRHO | Hyperthermophiles | 110 | 0.0273 |
| Y845_PEDPA | Mesophiles        | 113 | 0.0088 |
| Y875_STRSY | Mesophiles        | 113 | 0.0000 |
| Y880_MYCTU | Mesophiles        | 143 | 0.0559 |
| Y888_STRT1 | Thermophiles      | 110 | 0.0000 |
| Y890_MYCTU | Mesophiles        | 882 | 0.0351 |
| Y891_HAEIN | Mesophiles        | 64  | 0.0625 |
| Y893_HAEIN | Mesophiles        | 187 | 0.0000 |
| Y898_METM5 | Mesophiles        | 326 | 0.0583 |
| Y905_STRP6 | Mesophiles        | 113 | 0.0000 |
| Y911_STAES | Mesophiles        | 110 | 0.0000 |
| Y914_MYCBO | Mesophiles        | 882 | 0.0283 |
| Y942_SULSO | Hyperthermophiles | 310 | 0.0032 |
| Y949_LACBA | Mesophiles        | 113 | 0.0000 |
| YACG_ECO24 | Mesophiles        | 65  | 0.3231 |
| YACG_ECOL6 | Mesophiles        | 65  | 0.3077 |
| YACG_SALTY | Mesophiles        | 63  | 0.3016 |
| YAFC_ECOLI | Mesophiles        | 304 | 0.0099 |
| YAHA_ECOLI | Mesophiles        | 362 | 0.0000 |
| YAHB_ECOLI | Mesophiles        | 310 | 0.0161 |
| YBAO_ECO57 | Mesophiles        | 152 | 0.0000 |
| YBBB_BACSU | Mesophiles        | 529 | 0.0000 |
| YBBH_BACSU | Mesophiles        | 283 | 0.0071 |
| YBCM_ECOLI | Mesophiles        | 265 | 0.0113 |
| YBDO_ECOLI | Mesophiles        | 300 | 0.0000 |
| YBEF_ECOLI | Mesophiles        | 197 | 0.0000 |
| YBFI_BACSU | Mesophiles        | 275 | 0.0073 |
| YBFP_BACSU | Mesophiles        | 295 | 0.0237 |
| YBGA_BACSU | Mesophiles        | 235 | 0.0043 |
| YBHD_ECOLI | Mesophiles        | 317 | 0.0000 |
| YBIH_ECOLI | Mesophiles        | 223 | 0.0493 |
| YBJK_ECOLI | Mesophiles        | 178 | 0.0337 |
| YCAN_ECOLI | Mesophiles        | 302 | 0.0066 |
| YCBG_BACSU | Mesophiles        | 233 | 0.0043 |
| YCEK_BACSU | Mesophiles        | 100 | 0.0000 |
| YCFQ_ECOLI | Mesophiles        | 210 | 0.0095 |
| YCGE_BACSU | Mesophiles        | 154 | 0.0974 |
| YCGE_ECOLI | Mesophiles        | 243 | 0.0123 |
| YCGK_BACSU | Mesophiles        | 324 | 0.0062 |
| YCIT_ECOLI | Mesophiles        | 249 | 0.0000 |



|            |            |     |        |
|------------|------------|-----|--------|
| YCJW_ECOLI | Mesophiles | 332 | 0.0271 |
| YCJZ_ECOLI | Mesophiles | 299 | 0.0033 |
| YCNC_BACSU | Mesophiles | 292 | 0.0068 |
| YCNK_BACSU | Mesophiles | 190 | 0.0000 |
| YCXD_BACSU | Mesophiles | 444 | 0.0203 |
| YCZG_BACSU | Mesophiles | 104 | 0.0577 |
| YDCH_BACSU | Mesophiles | 147 | 0.0136 |
| YDCI_ECOLI | Mesophiles | 307 | 0.0326 |
| YDCR_ECOLI | Mesophiles | 468 | 0.0000 |
| YDEC_BACSU | Mesophiles | 291 | 0.0000 |
| YDEE_BACSU | Mesophiles | 290 | 0.0517 |
| YDEF_BACSU | Mesophiles | 462 | 0.0065 |
| YDEL_BACSU | Mesophiles | 463 | 0.0086 |
| YDEO_ECO57 | Mesophiles | 253 | 0.0198 |
| YDEO_ECOL6 | Mesophiles | 253 | 0.0198 |
| YDEO_ECOLI | Mesophiles | 253 | 0.0198 |
| YDEO_SHIFL | Mesophiles | 253 | 0.0158 |
| YDES_BACSU | Mesophiles | 198 | 0.0707 |
| YDFD_BACSU | Mesophiles | 62  | 0.0000 |
| YDFF_BACSU | Mesophiles | 226 | 0.0000 |
| YDFH_ECO57 | Mesophiles | 228 | 0.0482 |
| YDFH_ECOL6 | Mesophiles | 228 | 0.0482 |
| YDFI_BACSU | Mesophiles | 213 | 0.0094 |
| YDFL_BACSU | Mesophiles | 270 | 0.0000 |
| YDGC_BACSU | Mesophiles | 195 | 0.0000 |
| YDGG_BACSU | Mesophiles | 152 | 0.0132 |
| YDGJ_BACSU | Mesophiles | 164 | 0.1037 |
| YDHB_ECO57 | Mesophiles | 310 | 0.0484 |
| YDHC_BACSU | Mesophiles | 224 | 0.0402 |
| YDHM_ECOL6 | Mesophiles | 199 | 0.0452 |
| YDIP_ECOLI | Mesophiles | 303 | 0.0000 |
| YDJF_ECOLI | Mesophiles | 252 | 0.0000 |
| YEAM_ECOLI | Mesophiles | 273 | 0.0586 |
| YEAT_ECOLI | Mesophiles | 307 | 0.0000 |
| YEEY_ECOLI | Mesophiles | 309 | 0.0000 |
| YEGW_ECO57 | Mesophiles | 248 | 0.0000 |
| YEIE_ECO57 | Mesophiles | 293 | 0.0000 |
| YENR_YEREN | Mesophiles | 244 | 0.0287 |
| YERO_BACSU | Mesophiles | 289 | 0.0138 |
| YESN_BACSU | Mesophiles | 368 | 0.0217 |
| YESS_BACSU | Mesophiles | 761 | 0.0118 |
| YETL_BACSU | Mesophiles | 167 | 0.0240 |
| YEZE_BACSU | Mesophiles | 194 | 0.0000 |
| YFER_ECOLI | Mesophiles | 308 | 0.0032 |
| YFET_ECOLI | Mesophiles | 285 | 0.0246 |
| YFHH_ECOLI | Mesophiles | 282 | 0.0390 |
| YFIE_ECOLI | Mesophiles | 293 | 0.0068 |
| YFIF_BACSU | Mesophiles | 314 | 0.0127 |
| YFIK_BACSU | Mesophiles | 220 | 0.0000 |
| YFIR_BACSU | Mesophiles | 205 | 0.0585 |

|             |            |     |        |
|-------------|------------|-----|--------|
| YFIV_BACSU  | Mesophiles | 160 | 0.0125 |
| YFJR_ECOLI  | Mesophiles | 233 | 0.0000 |
| YFMP_BACSU  | Mesophiles | 140 | 0.0500 |
| YGAE_ECOLI  | Mesophiles | 220 | 0.0000 |
| YGAV_ECOLI  | Mesophiles | 99  | 0.0505 |
| YGBI_ECOLI  | Mesophiles | 265 | 0.0453 |
| YGEK_ECO57  | Mesophiles | 210 | 0.0000 |
| YGEK_ECOLI  | Mesophiles | 210 | 0.0000 |
| YGEV_ECOLI  | Mesophiles | 592 | 0.0473 |
| YGFI_ECOLI  | Mesophiles | 298 | 0.0101 |
| YHAJ_ECO57  | Mesophiles | 298 | 0.0168 |
| YHBI_BACSU  | Mesophiles | 154 | 0.0260 |
| YHCF_BACSU  | Mesophiles | 121 | 0.0331 |
| YHCZ_BACSU  | Mesophiles | 214 | 0.1121 |
| YHDI_BACSU  | Mesophiles | 469 | 0.0362 |
| YHGD_BACSU  | Mesophiles | 191 | 0.0000 |
| YHJB_ECOLI  | Mesophiles | 200 | 0.0000 |
| YHJC_ECOLI  | Mesophiles | 299 | 0.0000 |
| YHJH_BACSU  | Mesophiles | 175 | 0.0171 |
| YHTH1_STAAU | Mesophiles | 745 | 0.0228 |
| YIAU_ECOLI  | Mesophiles | 324 | 0.0401 |
| YIDL_ECOLI  | Mesophiles | 307 | 0.0391 |
| YIDP_ECOLI  | Mesophiles | 238 | 0.0000 |
| YIDZ_ECO24  | Mesophiles | 319 | 0.0063 |
| YIDZ_ECO57  | Mesophiles | 319 | 0.0063 |
| YIDZ_ECODH  | Mesophiles | 319 | 0.0000 |
| YIDZ_ECOL6  | Mesophiles | 319 | 0.0063 |
| YIDZ_ECOLU  | Mesophiles | 319 | 0.0063 |
| YIDZ_SALTY  | Mesophiles | 319 | 0.0063 |
| YIDZ_SHIDS  | Mesophiles | 319 | 0.0063 |
| YIEP_ECOLI  | Mesophiles | 230 | 0.0000 |
| YIHL_ECO57  | Mesophiles | 236 | 0.1356 |
| YIHW_ECOLI  | Mesophiles | 261 | 0.0651 |
| YIJO_ECOLI  | Mesophiles | 283 | 0.0636 |
| YISR_BACSU  | Mesophiles | 287 | 0.0000 |
| YISV_BACSU  | Mesophiles | 484 | 0.0455 |
| YJCO_BACSU  | Mesophiles | 153 | 0.0458 |
| YJDC_ECOL6  | Mesophiles | 191 | 0.0000 |
| YJGJ_ECOLI  | Mesophiles | 197 | 0.0660 |
| YJIE_ECOLI  | Mesophiles | 123 | 0.0000 |
| YJIR_ECOLI  | Mesophiles | 470 | 0.0723 |
| YJJM_ECOLI  | Mesophiles | 304 | 0.0230 |
| YJJQ_ECO57  | Mesophiles | 241 | 0.0249 |
| YKGA_ECOLI  | Mesophiles | 239 | 0.0000 |
| YKGD_ECOLI  | Mesophiles | 284 | 0.0035 |
| YKOM_BACSU  | Mesophiles | 154 | 0.0130 |
| YKUM_BACSU  | Mesophiles | 293 | 0.0000 |
| YKVZ_BACSU  | Mesophiles | 321 | 0.0000 |
| YLA3_LACAC  | Mesophiles | 124 | 0.0565 |
| YLAC_BACSU  | Mesophiles | 173 | 0.0405 |

|            |            |     |        |
|------------|------------|-----|--------|
| YLXM_BACSU | Mesophiles | 110 | 0.0000 |
| YMFC_BACSU | Mesophiles | 241 | 0.0041 |
| YMFN_ECOLI | Mesophiles | 455 | 0.0593 |
| YNEJ_ECOLI | Mesophiles | 293 | 0.0000 |
| YNFL_ECOLI | Mesophiles | 297 | 0.0168 |
| YOAU_BACSU | Mesophiles | 290 | 0.0000 |
| YOBQ_BACSU | Mesophiles | 241 | 0.0000 |
| YOBS_BACSU | Mesophiles | 191 | 0.0000 |
| YOBV_BACSU | Mesophiles | 313 | 0.0000 |
| YOFA_BACSU | Mesophiles | 285 | 0.0632 |
| YOFM_LACLA | Mesophiles | 111 | 0.0000 |
| YPB3_LACLA | Mesophiles | 196 | 0.0000 |
| YPDC_ECOLI | Mesophiles | 285 | 0.0000 |
| YPOP_BACSU | Mesophiles | 141 | 0.0000 |
| YQHC_ECOLI | Mesophiles | 318 | 0.0220 |
| YQIR_BACSU | Mesophiles | 692 | 0.0289 |
| YRAN_BACSU | Mesophiles | 289 | 0.0000 |
| YSMB_BACSU | Mesophiles | 146 | 0.0000 |
| YTDP_BACSU | Mesophiles | 772 | 0.0155 |
| YTLI_BACSU | Mesophiles | 308 | 0.0487 |
| YTRA_BACSU | Mesophiles | 130 | 0.0231 |
| YTTP_BACSU | Mesophiles | 207 | 0.0000 |
| YTZE_BACSU | Mesophiles | 73  | 0.1096 |
| YUAB_ECOLI | Mesophiles | 353 | 0.0000 |
| YULB_BACSU | Mesophiles | 258 | 0.0194 |
| YURK_BACSU | Mesophiles | 242 | 0.0041 |
| YUSO_BACSU | Mesophiles | 155 | 0.1419 |
| YUST_BACSU | Mesophiles | 295 | 0.0000 |
| YUXN_BACSU | Mesophiles | 291 | 0.0000 |
| YVAF_BACSU | Mesophiles | 190 | 0.0105 |
| YVBU_BACSU | Mesophiles | 292 | 0.0034 |
| YVDE_BACSU | Mesophiles | 316 | 0.0000 |
| YVDT_BACSU | Mesophiles | 194 | 0.0000 |
| YVFU_BACSU | Mesophiles | 200 | 0.0000 |
| YVKB_BACSU | Mesophiles | 189 | 0.0053 |
| YVMB_BACSU | Mesophiles | 169 | 0.0769 |
| YVNA_BACSU | Mesophiles | 37  | 0.0000 |
| YVOA_BACSU | Mesophiles | 243 | 0.1481 |
| YWAE_BACSU | Mesophiles | 171 | 0.0994 |
| YWBI_BACSU | Mesophiles | 301 | 0.0000 |
| YWCC_BACSU | Mesophiles | 223 | 0.0000 |
| YWHA_BACSU | Mesophiles | 139 | 0.0791 |
| YWOH_BACSU | Mesophiles | 137 | 0.0000 |
| YWQM_BACSU | Mesophiles | 293 | 0.0034 |
| YWRC_BACSU | Mesophiles | 158 | 0.0000 |
| YXAD_BACSU | Mesophiles | 143 | 0.0000 |
| YXAF_BACSU | Mesophiles | 191 | 0.0576 |
| YXBF_BACSU | Mesophiles | 380 | 0.0105 |
| YXJL_BACSU | Mesophiles | 218 | 0.0092 |
| YXJO_BACSU | Mesophiles | 291 | 0.0172 |

|            |            |     |        |
|------------|------------|-----|--------|
| YYAN_BACSU | Mesophiles | 138 | 0.0000 |
| YYBA_BACSU | Mesophiles | 150 | 0.0200 |
| YYBE_BACSU | Mesophiles | 292 | 0.0000 |
| YYDK_BACSU | Mesophiles | 236 | 0.0000 |
| ZNTR_ECO57 | Mesophiles | 141 | 0.0284 |
| ZNTR_HAEIN | Mesophiles | 135 | 0.0741 |
| ZRAR_ECO57 | Mesophiles | 441 | 0.0113 |
| ZRAR_ECOLI | Mesophiles | 441 | 0.0113 |
| ZRAR_SALTY | Mesophiles | 441 | 0.0159 |
| ZRP_ZYMMO  | Mesophiles | 153 | 0.0000 |
| ZURR_LISIN | Mesophiles | 141 | 0.0000 |
| ZUR_BACSU  | Mesophiles | 145 | 0.0138 |
| ZUR_ECOLI  | Mesophiles | 171 | 0.0468 |
